# Supplementary material for: Total synthesis and structural reassignment of garcinielliptone FC, a polycyclic polyprenylated acylphloroglucinol with diverse bioactivity
Source: Royal Society of Chemistry journal article supplement (doi:10.1039/d3cc01268a), 2023-01-01
Supplement: d3cc01268a1.pdf [file d3cc01268a1.pdf]

# Total synthesis and structural reassignment of garcinielliptone FC, a polycyclic polyprenylated acylphloroglucinol with diverse bioactivity

Yang Luo,<sup>a</sup> Robert B. Grossman,<sup>b</sup> Xiao-Bin Nie,<sup>a</sup> and Xing-Wei Yang<sup>a,\*</sup>

<sup>a</sup> School of Pharmaceutical Sciences (Shenzhen), Sun Yat-sen University, Shenzhen 518107, People's Republic of China

<sup>b</sup> Department of Chemistry, University of Kentucky, Lexington, Kentucky 40506-0055, United States

## Electronic Supplementary Information

### Table of contents

- SI-1. Table for NMR Data of GFC and Xanthochymol (Pages S2–S3)
- SI-2. Experimental Procedures (Pages S4–S17)
- SI-3. The Original NMR and MS Spectra of New Compounds (Pages S18–S53)

## SI-1 Table for NMR Data of GFC and Xanthochymol

**Table S1. The <sup>1</sup>H NMR Data of GFC and Xanthochymol in Different Solvent**

| no. | GFC <sup>a,b</sup>       | xanthochymol <sup>b</sup><br>(synthetic) | xanthochymol <sup>c</sup><br>(synthetic) | xanthochymol <sup>c</sup><br>(natural) <sup>d</sup> |
|-----|--------------------------|------------------------------------------|------------------------------------------|-----------------------------------------------------|
| 6   | 2.37, brd (13.9)         | 2.37, brd (13.9)                         | 2.25, d (14.0)                           | 2.26, m                                             |
|     | 2.07, brd (13.9)         | 2.06, dd (13.9, 6.8)                     | 2.04, m                                  | 2.05, m                                             |
| 7   | 1.45, m                  | 1.43, m                                  | 1.50, m                                  | 1.51, m                                             |
| 10  | 2.74, brd (13.6)         | 2.73, dd (13.5, 9.8)                     | 2.71, dd (13.5, 9.4)                     | 2.77, m                                             |
|     | 2.58, brd (13.6)         | 2.58, brd (13.5)                         | 2.54, m                                  | 2.51, m                                             |
| 11  | 5.09, t (7.2)            | 5.08, t (7.5)                            | 5.03, m                                  | 5.07, m                                             |
| 13  | 1.80, s                  | 1.80, s                                  | 1.73, s                                  | 1.74, s                                             |
| 14  | 1.73, s                  | 1.74, s                                  | 1.68, s                                  | 1.69, s                                             |
| 17  | 7.03, d (1.7)            | 6.99, s                                  | 7.18, d (2.1)                            | 7.21, d (2.1)                                       |
| 20  | 6.67, d (8.2)            | 6.66, d (8.5)                            | 6.70, d (8.3)                            | 6.72, d (8.0)                                       |
| 21  | 7.01, dd (8.2, 1.7)      | 7.00, d (8.5)                            | 6.98, dd (8.3, 2.1)                      | 7.00, dd (8.0, 2.1)                                 |
| 22  |                          | 2.17, m                                  | 2.01, m                                  | 2.02, m                                             |
|     | 1.88, m, 2H <sup>e</sup> | 1.88, m                                  | 1.92, dd, (14.0, 5.7)                    | 1.93, m                                             |
| 23  | 2.64 brd (13.6)          | 2.64, m                                  | 2.54, m                                  | 2.51, m                                             |
| 25  | 4.43, 2H, s              | 4.42, 4.41, s                            | 4.50, brs, 2H                            | 4.53, brs, 2H                                       |
| 26  | 1.56, s                  | 1.55, s                                  | 1.60, s                                  | 1.59, s                                             |
| 27  | 2.12, m <sup>e</sup>     | 1.47, m, 2H                              | 1.46, m                                  | 1.46, m, 2H                                         |
|     | 1.95, m <sup>e</sup>     |                                          | 1.40, m                                  |                                                     |
| 28  | 1.88, m, 2H              | 1.86, m, 2H                              | 1.87, 1.83, m                            | 1.85, m, 2H                                         |
| 30  | 4.66, 4.64, s            | 4.66, 4.63, s                            | 4.64, 4.62, s                            | 4.65, brs, 2H                                       |
| 31  | 1.69, s                  | 1.70, s                                  | 1.68, s                                  | 1.69, s                                             |
| 32  | 2.16, dd (14.5, 8.0)     | 2.13, m                                  | 2.09, m                                  | 2.03, m, 2H                                         |
|     | 1.99, dd (14.5, 7.2)     | 1.95, m                                  | 1.98, m                                  |                                                     |
| 33  | 4.91, t (7.2)            | 4.92, t (7.5)                            | 4.87, overlap                            | 4.88, m                                             |
| 35  | 1.70, s                  | 1.70, s                                  | 1.65, s                                  | 1.67, s                                             |
| 36  | 1.53, s                  | 1.53, s                                  | 1.49, s                                  | 1.50, s                                             |
| 37  | 1.15, s                  | 1.15, s                                  | 1.15, s                                  | 1.17, s                                             |
| 38  | 1.00, s                  | 1.00, s                                  | 0.99, s                                  | 1.01, s                                             |

<sup>a</sup> Data from *J. Nat. Prod.* **2008**, 246-250. <sup>b</sup> Recorded in CDCl<sub>3</sub>. <sup>c</sup> Recorded in methanol-*d*<sub>4</sub>+0.1% TFA. <sup>d</sup> Data from *J. Nat. Prod.* **2000**, 1070-1076. <sup>e</sup> Signals were most probably assigned incorrectly.

**Table S2. The <sup>13</sup>C NMR Data of GFC and Xanthochymol in Different Solvent**

| no. | GFC <sup>a,b</sup> | xanthochymol <sup>b</sup><br>(synthetic) | xanthochymol <sup>c</sup><br>(synthetic) | xanthochymol <sup>c</sup><br>(natural) <sup>d</sup> | Difference<br>in CD <sub>3</sub> OD |
|-----|--------------------|------------------------------------------|------------------------------------------|-----------------------------------------------------|-------------------------------------|
| 1   | 69.1               | 69.7                                     | 69.7                                     | 69.8                                                | -0.1                                |
| 2   | 194.0              | 194.4                                    | 194.1                                    | 194.4                                               | -0.3                                |
| 3   | 116.0              | 115.9                                    | 117.9                                    | 117.9                                               | 0                                   |
| 4   | 198.1              | 198.4                                    | 195.6                                    | 195.7                                               | -0.1                                |
| 5   | 57.8               | 57.9                                     | 59.8                                     | 59.9                                                | -0.1                                |
| 6   | 42.6               | 42.5                                     | 43.7                                     | 43.9                                                | -0.2                                |
| 7   | 46.8               | 46.8                                     | 47.9                                     | 48.1                                                | -0.2                                |
| 8   | 49.6               | 49.6                                     | 50.2                                     | 50.4                                                | -0.1                                |
| 9   | 209.2              | 209.3                                    | 210.6                                    | 209.8                                               | +0.8                                |
| 10  | 26.4               | 26.3                                     | 27.0                                     | 27.2                                                | -0.2                                |
| 11  | 120.2              | 120.2                                    | 121.3                                    | 121.4                                               | -0.1                                |
| 12  | 135.1              | 135.2                                    | 135.9                                    | 136.0                                               | -0.1                                |
| 13  | 26.1               | 25.8                                     | 26.4                                     | 26.6                                                | -0.2                                |
| 14  | 17.9               | 18.2                                     | 18.3                                     | 18.5                                                | -0.2                                |
| 15  | 195.8              | 193.9                                    | 195.7                                    | 196.4                                               | -0.7                                |
| 16  | 128.3              | 128.1                                    | 129.5                                    | 129.5                                               | 0                                   |
| 17  | 116.5              | 116.5                                    | 117.3                                    | 117.5                                               | -0.2                                |
| 18  | 143.3              | 143.4                                    | 147.0                                    | 147.0                                               | 0                                   |
| 19  | 149.4              | 149.5                                    | 152.5                                    | 152.5                                               | 0                                   |
| 20  | 114.4              | 114.3                                    | 115.1                                    | 115.2                                               | -0.1                                |
| 21  | 124.3              | 124.2                                    | 125.2                                    | 125.3                                               | -0.1                                |
| 22  | 36.5 <sup>e</sup>  | 36.6                                     | 37.7                                     | 37.8                                                | -0.1                                |
| 23  | 43.6               | 43.3                                     | 44.7                                     | 44.8                                                | -0.1                                |
| 24  | 148.1              | 147.4                                    | 148.9                                    | 149.0                                               | -0.1                                |
| 25  | 113.2              | 113.2                                    | 113.5                                    | 113.7                                               | -0.2                                |
| 26  | 17.1               | 17.2                                     | 17.7                                     | 17.9                                                | -0.2                                |
| 27  | 31.9               | 31.8                                     | 32.7                                     | 32.9                                                | -0.2                                |
| 28  | 35.5               | 35.5                                     | 36.8                                     | 36.9                                                | -0.1                                |
| 29  | 146.0              | 146.0                                    | 146.3                                    | 146.5                                               | -0.2                                |
| 30  | 109.6              | 109.6                                    | 110.4                                    | 110.6                                               | -0.2                                |
| 31  | 22.5 <sup>e</sup>  | 22.7                                     | 22.8                                     | 23.0                                                | -0.2                                |
| 32  | 29.1 <sup>f</sup>  | 28.9                                     | 30.3                                     | 30.4                                                | -0.1                                |
| 33  | 123.9              | 123.8                                    | 125.6                                    | 125.7                                               | -0.1                                |
| 34  | 132.9              | 132.9                                    | 133.7                                    | 133.7                                               | 0                                   |
| 35  | 25.8 <sup>e</sup>  | 26.1                                     | 26.0                                     | 26.1                                                | -0.1                                |
| 36  | 17.7               | 17.9                                     | 18.2                                     | 18.4                                                | -0.2                                |
| 37  | 22.7               | 22.6                                     | 23.2                                     | 23.3                                                | -0.1                                |
| 38  | 27.0               | 27.0                                     | 27.3                                     | 27.5                                                | -0.2                                |

<sup>a</sup> Data from *J. Nat. Prod.* **2008**, 246-250. <sup>b</sup> Recorded in CDCl<sub>3</sub>. <sup>c</sup> Recorded in methanol-*d*<sub>4</sub> +0.1% TFA. <sup>d</sup> Data from *J. Nat. Prod.* **2000**, 1070-1076. <sup>e</sup> Exchanged signals. <sup>f</sup> Revised data based on the data of its keto-enol tautomeric isomer (*J. Nat. Prod.* **2008**, 246-250).

## SI-2 Experimental Procedures

**General Experimental Procedures.** NMR spectra were recorded on a Bruker DRX-500 or DRX-600 spectrometer with TMS as the internal standard in CDCl<sub>3</sub> or CD<sub>3</sub>OD. Chemical shifts ( $\delta$ ) are expressed in ppm with reference to the solvent signals. ESIMS and HREIMS data were acquired on an Agilent Q-TOF mass spectrometer. X-ray data were generated using a Bruker Apex Duo instrument. Preparative HPLC was performed on an Agilent 1260 HPLC with a Waters SunFire C18 OBD 5  $\mu$ m column (19  $\times$  250 mm). Silica gel (200–300 mesh, Qingdao Marine Chemical Co., Ltd.) were used for column chromatography. Fractions were monitored by TLC (GF 254, Qingdao Marine Chemical Co., Ltd.), and spots were visualized by heating silica gel plates immersed in H<sub>2</sub>SO<sub>4</sub> in ethanol.

### Synthesis of $\alpha$ -ketoester 7

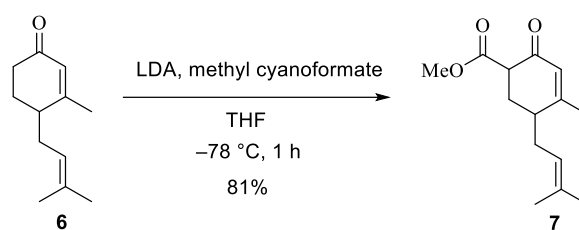

To a solution of cyclohexanone **6** (5.348 g, 30 mmol, 1.0 equiv) in THF (125 mL) was added dropwise a solution of LDA (33 mmol, 1.1 equiv) at  $-78$  °C. After stirring the reaction mixture at that temperature for 1 h, methyl cyanofornate (5.103 g, 60 mmol, 2.0 equiv) was added. The stirring was continued for an additional period of 1 hour, after which the reaction mixture was quenched with saturated aq. NH<sub>4</sub>Cl, allowed to warm to 25 °C, and extracted two times with EtOAc. The combined organic layers were washed with brine, dried over Na<sub>2</sub>SO<sub>4</sub> filtered and concentrated in vacuo. Purification of the residue by column chromatograph (silica gel, petroleum ether/EtOAc, 9:1) to afford  $\alpha$ -ketoester **7** (5.734g, 81% yield).

**<sup>1</sup>H NMR (500 MHz, CDCl<sub>3</sub>)**  $\delta$  5.93 (s, 0.5H, b), 5.87 (s, 1H, a), 5.09 (t,  $J = 7.3$  Hz, 1.1H, a), 5.02 (t,  $J = 7.0$  Hz, 0.6H, b), 3.75 (s, 1.5H, b), 3.74 (s, 3.3H, a), 3.46 (dd,  $J = 11.3, 5.1$  Hz, 1H, a), 3.36 (dd,  $J = 13.7, 4.7$  Hz, 0.5H, b), 2.48 – 2.29 (m, 4.6H, a + b), 2.21 – 2.10 (m, 2.4H, a + b), 2.08 – 2.03 (m, 1.7H, a + b), 1.98 (s, 3H, a), 1.97 (s, 1.7H, b), 1.71 (s, 2.9H, a), 1.70 (s, 1.9H, b), 1.62 (s,

2.9H, a), 5.93 (s, 1.7H, b);  $^{13}\text{C}$  NMR (125 MHz,  $\text{CDCl}_3$ )  $\delta$  194.0 (b), 193.7 (a), 171.3 (b), 171.2 (a), 166.3 (a), 165.4 (b), 134.8 (b), 134.7 (a), 127.2 (b), 126.0 (a), 121.4 (a), 120.3 (b), 53.6 (b), 52.4 (a), 52.3 (b), 49.7 (a), 39.6 (b), 39.0 (a), 30.9 (b), 30.5 (b), 29.9 (a), 29.6 (a), 26.0 (b), 26.0 (a), 23.2 (a), 22.4 (b), 18.1 (b), 18.0 (a).

MS positive ESIMS  $m/z$  259  $[\text{M} + \text{Na}]^+$ , 495  $[2\text{M} + \text{Na}]^+$ .

### Synthesis of ester **9**

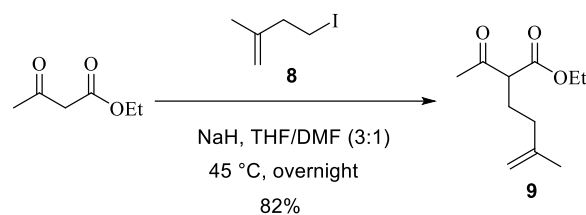

To a solution of ethyl acetoacetate (10.2 mL, 80 mmol, 1.0 equiv) in anhydrous THF (150 mL) was added portion-wise NaH (60 % in mineral oil, 3.68 g, 92 mmol, 1.15 equiv) under argon at 0 °C. After stirring for 1 h the iodide **8** (10 mL, 80mmol, 1.0 equiv) in DMF (50 mL) was added to the mixture. The reaction mixture was now allowed to warm to 45 °C and stirred overnight in the dark. The mixture was quenched with saturated aq.  $\text{NH}_4\text{Cl}$  and diluted with EtOAc, extracted three times with EtOAc. The combined organic layers were washed with brine, dried over  $\text{Na}_2\text{SO}_4$ , filtered and concentrated. Purification of the residue by column chromatography (silica gel, petroleum ether/EtOAc, 10:1) to afford ester **9** (12.988 g, 82% yield).

The spectral data of ester **9** matched with those in the literature.<sup>[1]</sup>

### Synthesis of enone **10**

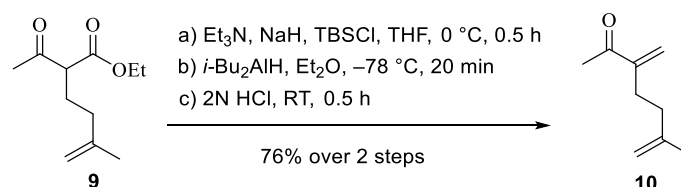

To a solution of corresponding ester **9** (9.9 g, 50 mmol, 1.0 equiv) in anhydrous THF (120 mL) was successively added  $\text{Et}_3\text{N}$  (6.9 mL, 50 mmol, 1.0 equiv) and NaH (60 % in mineral oil, 2.256 g, 56.4 mmol, 1.15 equiv) under argon at 0 °C. After stirring for 10 min at this temperature TBSCl (11.304 g, 75 mmol, 1.5 equiv) was added and the mixture was stirred for 30 min at 0 °C. The

solution was quenched with saturated aq.  $\text{NaHCO}_3$  and diluted with EtOAc, extracted three times with EtOAc. The combined organic layers were washed with brine, dried over  $\text{Na}_2\text{SO}_4$ , filtered and concentrated. The crude product was used without further purification.

To a solution of the crude product in anhydrous  $\text{Et}_2\text{O}$  (10 mL) was added dropwise *i*- $\text{Bu}_2\text{AlH}$  (150 mL, 3M in hexanes, 3.0 equiv) under argon at  $-78^\circ\text{C}$ . The resulting solution was allowed to stir at the same temperature for 20 min. The reaction was quenched with saturated aq. potassium sodium tartrate at  $-78^\circ\text{C}$  and gradually warm to room temperature. The resulting suspension was diluted with EtOAc, extracted three times with EtOAc. The combined organic layers were washed with brine, dried over  $\text{Na}_2\text{SO}_4$ , filtered and concentrated. The crude product was used without further purification.

The crude product was added aq. 2N HCl (10 mL) at room temperature. After stirring at that temperature for 30 min, the resulting mixture was extracted three times with *n*-pentane. The combined organic layers were washed with brine, dried over  $\text{Na}_2\text{SO}_4$ , filtered and concentrated. Purification of the residue by column chromatography (silica gel, *n*-pentane/acetone, 50:1) to afford enone **10** (5.244 g, 76% overall yield).

The spectral data of enone **10** matched with those in the literature.<sup>[2]</sup>

## Synthesis of compound 11

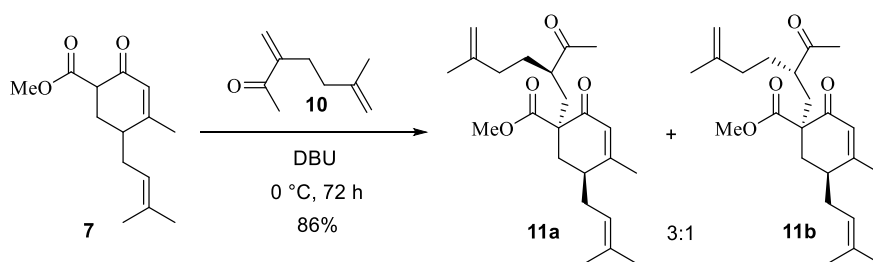

$\alpha$ -Ketoester **7** (2.36 g, 10 mmol, 1.0 equiv) was charged to a flame dried flask and enone **10** (2.76 g, 20 mmol, 2.0 equiv) was added under argon. The resulting mixture was cooled to  $0^\circ\text{C}$  and 1,8-diazabicyclo[5.4.0]undec-7-ene (DBU) (299  $\mu\text{L}$ , 2 mmol, 0.2 equiv) was added to obtain a yellow solution. After stirring the solution for 72 hours at  $0^\circ\text{C}$ , the reaction was quenched with aq. 2N HCl, and extracted three times with EtOAc. The combined organic layers were washed with brine, dried over  $\text{Na}_2\text{SO}_4$ , filtered and concentrated. Purification of the residue by column chromatography to

(silica gel, petroleum ether/EtOAc, 6:1) afford a pair of diastereoisomers **11a** and **11b** (2.412 g for **11a** and 0.801 g for **11b**, 3:1, 86% yield).

**11a:** <sup>1</sup>H NMR (600 MHz, CDCl<sub>3</sub>) δ 5.86 (s, 1H), 5.01 (t, *J* = 7.1 Hz, 1H), 4.70 (s, 1H), 4.64 (s, 1H), 3.72 (s, 3H), 2.72 – 2.68 (m, 1H), 2.42 (brs, 2H), 2.28 – 2.22 (m, 2H), 2.20 (s, 3H), 2.07 – 2.02 (m, 1H), 1.98 (s, 3H), 1.96 – 1.89 (m, 2H), 1.80 – 1.72 (m, 2H), 1.71 (s, 3H), 1.69 – 1.65 (m, 1H), 1.68 (s, 3H), 1.61 (s, 3H), 1.51 – 1.45 (m, 1H); <sup>13</sup>C NMR (150 MHz, CDCl<sub>3</sub>) δ 210.9, 195.6, 172.1, 164.0, 144.1, 133.6, 124.9, 119.7, 109.4, 56.9, 51.5, 47.5, 35.6, 33.75, 33.71, 32.1, 30.9, 29.6, 29.2, 25.0, 21.6, 21.4, 17.1.

MS positive ESIMS *m/z* 375 [M + H]<sup>+</sup>, 413 [M + K]<sup>+</sup>, 771 [2M + Na]<sup>+</sup>. HRESIMS *m/z* 397.2358 [M + Na]<sup>+</sup> (calcd for C<sub>23</sub>H<sub>34</sub>O<sub>4</sub>Na, 397.2349).

**11b:** <sup>1</sup>H NMR (600 MHz, CDCl<sub>3</sub>) δ 5.77 (s, 1H), 5.04 (t, *J* = 7.0 Hz, 1H), 4.71 (s, 1H), 4.67 (s, 1H), 3.70 (s, 3H), 2.89 – 2.85 (m, 1H), 2.58 (brs, 1H), 2.47 – 2.39 (m, 2H), 2.20 (dd, *J* = 13.8, 10.3 Hz, 1H), 2.09 (s, 3H), 2.04 – 2.00 (m, 2H), 1.98 (s, 3H), 1.95 (dd, *J* = 13.7, 4.9 Hz, 1H), 1.72 – 1.67 (m, 3H), 1.71 (s, 3H), 1.61 (s, 3H), 1.50 – 1.42 (m, 1H); <sup>13</sup>C NMR (150 MHz, CDCl<sub>3</sub>) δ 210.4, 196.1, 172.9, 162.9, 144.3, 133.7, 126.0, 119.6, 109.3, 55.9, 51.4, 47.0, 36.5, 35.7, 33.8, 31.9, 30.7, 29.5, 28.7, 25.0, 21.7, 21.4, 17.1.

MS positive ESIMS *m/z* 375 [M + H]<sup>+</sup>, 397 [M + Na]<sup>+</sup>, 413 [M + K]<sup>+</sup>, 771 [2M + Na]<sup>+</sup>. HRESIMS *m/z* 397.2357 [M + Na]<sup>+</sup> (calcd for C<sub>23</sub>H<sub>34</sub>O<sub>4</sub>Na, 397.2349).

**Crystal data for 11b:** C<sub>23</sub>H<sub>34</sub>O<sub>4</sub>, *M* = 374.50, *a* = 9.1816(5) Å, *b* = 23.6417(12) Å, *c* = 10.0047(5) Å, *α* = 90°, *β* = 102.444(2)°, *γ* = 90°, *V* = 2120.69(19) Å<sup>3</sup>, *T* = 100.(2) K, space group *P*121/*n*1, *Z* = 4, *μ*(Cu Kα) = 0.624 mm<sup>-1</sup>, 21766 reflections measured, 4182 independent reflections (*R*<sub>int</sub> = 0.1293). The final *R*<sub>*I*</sub> values were 0.0786 (*I* > 2σ(*I*)). The final *wR*(*F*<sup>2</sup>) values were 0.2113 (*I* > 2σ(*I*)). The final *R*<sub>*I*</sub> values were 0.1086 (all data). The final *wR*(*F*<sup>2</sup>) values were 0.2536 (all data). The goodness of fit on *F*<sup>2</sup> was 1.114.

## Synthesis of silyl-ether **12**

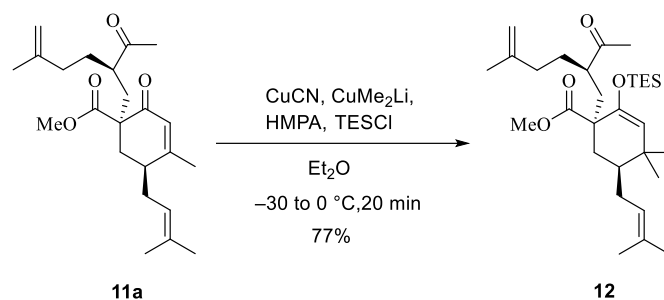

$\text{CuCN}$  (107.5 mg, 1.2 mmol, 0.3 equiv) was charged to a flame dried flask and  $\text{CuMe}_2\text{Li}$  (22.4 mL, 0.5 M in  $\text{Et}_2\text{O}$ , 11.2 mmol, 2.8 equiv) was added dropwise under argon at  $-30$  °C. After stirring 2 min, compound **11a** (1.5 g, 4 mmol, 1.0 equiv) in anhydrous  $\text{Et}_2\text{O}$  (20 mL) was added dropwise. The resulting bright yellow suspension was continued to stir at the same temperature for 20 min.  $\text{HMPA}$  (2.78 mL, 16 mmol, 4.0 equiv) and  $\text{TESCl}$  (1.68 mL, 10 mmol, 2.5 equiv) were successively added and the reaction mixture was gradually warmed to  $0$  °C and additionally stirred for 5 min at  $0$  °C. The reaction mixture was quenched by saturated aq.  $\text{NaHCO}_3$  and extracted three times with  $\text{EtOAc}$ . The combined organic layers were washed with brine, dried over  $\text{Na}_2\text{SO}_4$ , filtered and concentrated. Purification of the residue by column chromatography (silica gel, petroleum ether/ $\text{EtOAc}$ , 30:1) to afford silyl-ether **12** (1.552 g, 77% yield).

**$^1\text{H}$  NMR (500 MHz,  $\text{CDCl}_3$ )**  $\delta$  5.02 (t,  $J = 7.2$  Hz, 1H), 4.68 (s, 1H), 4.65 (s, 1H), 4.52 (s, 1H), 3.63 (s, 3H), 2.85 – 2.80 (m, 1H), 2.20 (dd,  $J = 14.3, 6.3$  Hz, 1H), 2.16 (s, 1H), 2.11 – 2.06 (brs, 1H), 1.93 (t,  $J = 8.1$  Hz, 2H), 1.84 (dd,  $J = 14.6, 3.3$  Hz, 1H), 1.79 – 1.72 (m, 2H), 1.69 (s, 6H), 1.67 – 1.59 (m, 2H), 1.57 (s, 3H), 1.41 – 1.35 (m, 2H), 1.01 (s, 3H), 0.95 (t,  $J = 8.0$  Hz, 9H), 0.87 (s, 3H), 0.67 – 0.62 (m, 6H);  **$^{13}\text{C}$  NMR (125 MHz,  $\text{CDCl}_3$ )**  $\delta$  212.4, 176.2, 149.0, 145.7, 132.5, 123.8, 115.4, 110.0, 52.2, 51.9, 48.9, 39.6, 35.9, 35.2, 34.9, 33.5, 31.9, 29.8, 29.7, 29.6, 28.7, 26.2, 23.5, 22.7, 18.0, 14.3, 6.9, 5.2.

**MS** positive ESIMS  $m/z$  505  $[\text{M} + \text{H}]^+$ , 527  $[\text{M} + \text{Na}]^+$ , 1032  $[2\text{M} + \text{Na}]^+$ . **HRESIMS**  $m/z$  527.3523  $[\text{M} + \text{Na}]^+$  (calcd for  $\text{C}_{25}\text{H}_{40}\text{O}_3\text{Na}$ , 527.3527).



## Synthesis of compound 13

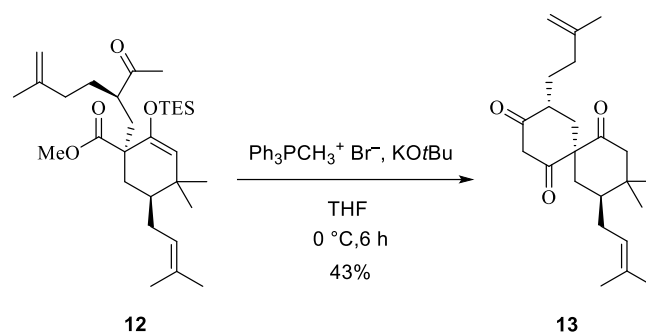

To a solution of  $\text{Ph}_3\text{PCH}_3^+ \text{Br}^-$  (1.072 g, 3 mmol, 3 equiv) in THF (10 mL) was added one portion  $\text{KOtBu}$  (393 mg, 3.5 mmol, 3.5 equiv) under argon at  $0^\circ\text{C}$ . The resulting mixture was allowed to warm to room temperature and stirred for 1 h, the yellow suspension was cooled to  $0^\circ\text{C}$  again followed by dropwise addition of silyl-ether **12** (504 mg, 1 mmol, 1.0 equiv, dissolved in 5 mL THF). Subsequently, the mixture was further stirred at room temperature for 6 hours. The reaction mixture was quenched with saturated aq.  $\text{NH}_4\text{Cl}$  and extracted three times with EtOAc. The combined organic layers were washed with brine, dried over  $\text{Na}_2\text{SO}_4$  filtered and concentrated in vacuo. Purification of the residue by column chromatograph (silica gel, petroleum ether/EtOAc 2:1) to afford compound **13** (154 mg, 43% yield).

**$^1\text{H}$  NMR (600 MHz,  $\text{CDCl}_3$ )**  $\delta$  5.08 (brs, 1H), 4.75 (s, 1H), 4.69 (s, 1H), 3.92 (d,  $J = 17.2$ , 1H), 3.42 (d,  $J = 17.2$ , 1H), 2.68 (dd,  $J = 14.6, 4.9$  Hz, 1H), 2.62 (d,  $J = 13.6$ , 1H), 2.31 – 2.24 (m, 3H), 2.14 – 2.04 (m, 4H), 1.79 – 1.74 (m, 2H), 1.72 (s, 3H), 1.70 (s, 3H), 1.65 – 1.60 (m, 2H), 1.62 (s, 3H), 1.45 – 1.38 (m, 2H), 1.12 (s, 3H), 0.83 (s, 3H);  **$^{13}\text{C}$  NMR (150 MHz,  $\text{CDCl}_3$ )**  $\delta$  211.8, 203.7, 203.0, 144.9, 133.5, 122.9, 111.2, 63.1, 59.0, 53.1, 45.3, 42.3, 39.9, 35.5, 35.0, 34.9, 29.9, 28.2, 26.1, 26.0, 22.2, 19.9, 18.1.

**MS** positive ESIMS  $m/z$  359  $[\text{M} + \text{H}]^+$ , 381  $[\text{M} + \text{Na}]^+$ , 397  $[\text{M} + \text{K}]^+$ , 739  $[2\text{M} + \text{Na}]^+$ . **HRESIMS**  $m/z$  381.2404  $[\text{M} + \text{Na}]^+$  (calcd for  $\text{C}_{25}\text{H}_{40}\text{O}_3\text{Na}$ , 381.2400).

## Synthesis of cyclohexanone 14

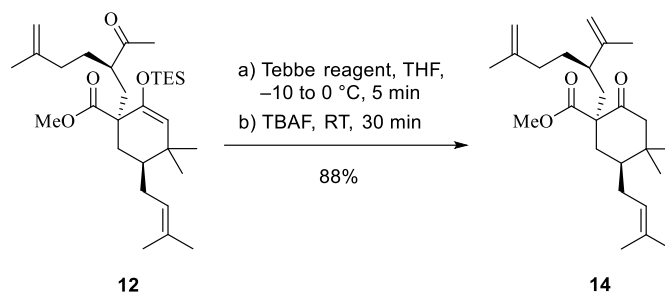

Preparation of Tebbe reagent: To a solution of titanocene dichloride (3.734 g, 15 mmol, 1.0 equiv) in anhydrous toluene (13.5 mL) was added dropwise  $\text{AlCl}_3$  (31.5 mL, 1M in hexanes, 2.1 equiv) under argon at  $0$  °C. The resulting suspension was allowed to warm to  $45$  °C and stirred for 48 hours. The crude product was used for Tebbe olefination without purification.

To a solution of silyl-ether **12** (1.008 g, 2.0 mmol, 1.0 equiv) in anhydrous THF (6 mL) was added dropwise Tebbe reagent (30 mL, 10 mmol, 5 equiv) under argon at  $-10$  °C. After stirring for 5 min, the resulting suspension was gradually warm to  $0$  °C and then quenched with saturated aq. potassium sodium tartrate, extracted three times with EtOAc. The combined organic layers were washed with brine, dried over  $\text{Na}_2\text{SO}_4$ , filtered and concentrated. The crude product was used without further purification.

The crude product was dissolved in THF (3 mL) and tetrabutylammonium fluoride (3 mL) was added at room temperature. After stirring for 30 min, the resulting mixture was quenched with aq. 2N HCl and extracted three times with EtOAc. The combined organic layers were washed with brine, dried over  $\text{Na}_2\text{SO}_4$ , filtered and concentrated. Purification of the residue by column chromatography (silica gel, petroleum ether/EtOAc, 50:1) to afford cyclohexanone **14** (683 mg, 88% overall yield).

$^1\text{H NMR}$  (500 MHz,  $\text{CDCl}_3$ )  $\delta$  5.11 (t,  $J = 7.4$  Hz, 1H), 4.75 (s, H), 4.71 (s, H), 4.66 (s, H), 4.60 (s, H), 3.73 (s, 3H), 2.50 (d,  $J = 13.6$  Hz, 1H), 2.23 – 2.19 (brs, 1H), 2.15 – 1.75 (m, 8H), 1.73 – 1.52 (m, 2H), 1.70 (s, 3H), 1.66 (s, 3H), 1.65 (s, 3H), 1.59 (s, 3H), 1.41 – 1.35 (m, 2H), 1.04 (s, 3H), 0.82 (s, 3H);  $^{13}\text{C NMR}$  (125 MHz,  $\text{CDCl}_3$ )  $\delta$  209.2, 172.9, 147.3, 145.8, 132.7, 123.2, 112.9, 109.8, 62.3, 53.0, 52.1, 43.9, 42.4, 39.1, 35.8, 35.4, 32.9, 31.9, 29.8, 28.2, 26.1, 22.7, 20.5, 18.7, 17.9.

**HRESIMS**  $m/z$  411.2875  $[M + Na]^+$  (calcd for  $C_{25}H_{40}O_3Na$ , 411.2870).

## Synthesis of compound **16**

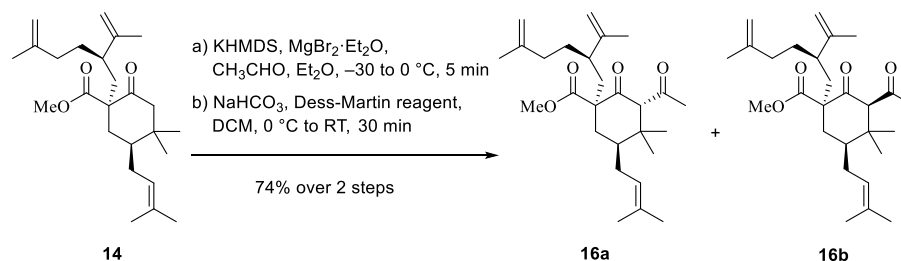

To a solution of cyclohexanone **14** (544 mg, 1.4 mmol, 1.0 equiv) in anhydrous  $Et_2O$  (3 mL) was added dropwise potassium bis(trimethylsilyl)amide (2.8 mL, 1 M in THF, 2.8 mmol, 2.0 equiv) under argon at  $-30$  °C. After stirring the reaction mixture at that temperature for 1 h, a freshly prepared mixture of  $MgBr_2 \cdot Et_2O$  (1.085 g, 4.2 mmol, 3.0 equiv) in  $Et_2O$  (9 mL) was added. After stirring for 10 min at  $-30$  °C, acetaldehyde (0.26 mL, 4.2 mmol, 3.0 equiv) was added at  $-30$  °C and then gradually warm to  $0$  °C and additionally stirred for 5 min at  $0$  °C. The reaction mixture was quenched with saturated aq.  $NH_4Cl$  solution, extracted three times with  $EtOAc$ . The combined organic layers were washed with brine, dried over  $Na_2SO_4$ , filtered and concentrated. The crude product was used without further purification.

To a solution of crude product in DCM (7.5 mL) was successively added  $NaHCO_3$  (118 mg, 1.4 mmol, 1.0 equiv) and Dess-Martin reagent (1.188 g, 2.8 mmol, 2.0 equiv) under argon at  $0$  °C. Subsequently, the reaction mixture was allowed to warm to room temperature. After stirring for 30 min at room temperature, the reaction mixture was quenched with saturated aq.  $NaHCO_3$  and extracted three times with DCM. The combined organic layers were washed with brine, dried over  $Na_2SO_4$ , filtered and concentrated. Purification of the residue by column chromatography (silica gel, petroleum ether/ $EtOAc$ , 15:1) to afford a pair of enantiomers diketones **16a** and **16b** (294 mg for **16a** and 151 mg for **16b**, 1.95:1, 74% overall yield).

**16a**:  $^1H$  NMR (400 MHz,  $CDCl_3$ )  $\delta$  5.08 (t,  $J = 6.5$  Hz, 1H), 4.78 (s, 1H), 4.73 (s, 1H), 4.68 (s, 1H), 4.62 (s, 1H), 3.75 (s, 3H), 3.66 (s, 1H), 2.25 – 2.20 (brs, 1H), 2.18 – 1.95 (m, 5H), 2.13 (s, 3H), 1.90 – 1.79 (m, 2H), 1.79 – 1.56 (m, 6H), 1.71 (s, 3H), 1.68 (s, 3H), 1.60 (s, 3H), 1.44 – 1.39 (m, 2H), 1.10 (s, 3H), 1.04 (s, 3H);  $^{13}C$  NMR (125 MHz,  $CDCl_3$ )  $\delta$  206.5, 204.7, 172.1, 147.0, 145.6, 133.2,

122.8, 113.3, 109.9, 69.7, 62.7, 52.4, 44.3, 44.1, 43.2, 36.2, 35.3, 32.8, 32.7, 32.2, 27.5, 26.8, 26.1, 22.7, 18.8, 17.9, 16.0.

**16b:**  $^1\text{H NMR}$  (400 MHz,  $\text{CDCl}_3$ )  $\delta$  5.16 (t,  $J = 6.8$  Hz, 1H), 4.73 (s, 1H), 4.66 (s, 1H), 4.63 (s, 2H), 3.82 (s, 1H), 3.66 (s, 3H), 2.34 – 2.22 (m, 3H), 2.18 (s, 3H), 1.93 – 1.82 (m, 3H), 1.78 – 1.66 (m, 3H), 1.72 (s, 3H), 1.69 (s, 3H), 1.63 – 1.33 (m, 5H), 1.60 (s, 3H), 1.59 (s, 3H), 1.09 (s, 3H), 1.02 (s, 3H);  $^{13}\text{C NMR}$  (125 MHz,  $\text{CDCl}_3$ )  $\delta$  205.6, 204.4, 173.2, 146.5, 146.1, 133.0, 123.1, 113.1, 109.7, 69.6, 59.9, 51.9, 43.7, 43.5, 42.1, 37.9, 35.4, 35.0, 33.0, 32.2, 26.9, 26.0, 24.6, 22.8, 18.0, 17.7.

**MS** positive ESIMS  $m/z$  431  $[\text{M} + \text{H}]^+$ , 453  $[\text{M} + \text{Na}]^+$ , 469  $[\text{M} + \text{K}]^+$ . **HRESIMS**  $m/z$  453.2981  $[\text{M} + \text{Na}]^+$ .

### Synthesis of compound 17

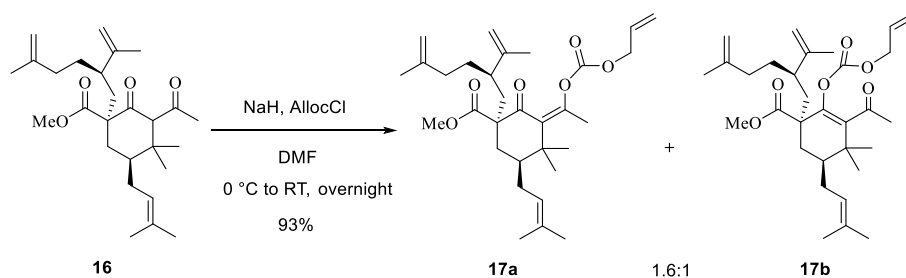

To a solution of diketone **16** (280 mg, 0.65 mmol, 1.0 equiv) in DMF was added portion-wise NaH (60% in mineral oil, 30 mg, 0.75 mmol, 1.15 equiv) under argon at 0 °C. The mixture was stirred for 1 h at this temperature and then allylchloroformiate (172  $\mu\text{L}$ , 1.625 mmol, 2.5 equiv) was added dropwise. The mixture was allowed to warm to room temperature and was further stirred overnight. The reaction mixture was quenched with saturated aq.  $\text{NH}_4\text{Cl}$  and extracted with EtOAc. The combined organic layers were washed with brine, dried over  $\text{Na}_2\text{SO}_4$ , filtered and concentrated. Purification of the residue by column chromatography (silica gel, petroleum ether/EtOAc, 12:1) to afford two regioisomeric allyl vinyl carbonates **17a** and **17b** (192 mg for **17a** and 119 mg for **17b**, 1.6:1, 93% overall yield).

**17a:**  $^1\text{H NMR}$  (500 MHz,  $\text{CDCl}_3$ )  $\delta$  5.98 – 5.90 (m, 1H), 5.38 (d,  $J = 17.2$  Hz, 1H), 5.30 (d,  $J = 10.5$  Hz, 1H), 4.99 (t,  $J = 7.4$  Hz, 1H), 4.71 (s, 1H), 4.68 – 4.65 (m, 4H), 4.61 (s, 1H), 3.69 (s, 3H), 2.42 (t,  $J = 13.9$  Hz, 1H), 2.11 – 2.02 (m, 3H), 1.93 (s, 3H), 1.89 (dd,  $J = 14.6, 3.4$  Hz, 1H), 1.85 –

1.80 (m, 2H), 1.74 (q,  $J = 7.0$  Hz, 1H), 1.70 – 1.65 (m, 1H), 1.67 (s, 3H), 1.65 – 1.55 (m, 1H), 1.61 (s, 3H), 1.58 (s, 3H), 1.45 – 1.30 (m, 2H), 1.18 (s, 3H), 1.11 (s, 3H);  $^{13}\text{C}$  NMR (125 MHz,  $\text{CDCl}_3$ )  $\delta$  203.2, 171.9, 151.9, 149.2, 147.5, 145.9, 135.6, 133.4, 131.2, 123.0, 119.7, 112.7, 109.7, 69.2, 60.5, 52.5, 43.9, 42.9, 41.9, 37.6, 35.4, 32.8, 32.3, 27.5, 26.5, 26.0, 22.7, 18.9, 18.2, 18.1, 18.0.

MS positive ESIMS  $m/z$  515  $[\text{M} + \text{H}]^+$ , 537  $[\text{M} + \text{Na}]^+$ , 553  $[\text{M} + \text{K}]^+$ . HRESIMS  $m/z$  537.3188  $[\text{M} + \text{Na}]^+$  (calcd for  $\text{C}_{31}\text{H}_{46}\text{O}_6\text{Na}$ , 537.3187).

**17b:**  $^1\text{H}$  NMR (500 MHz,  $\text{CDCl}_3$ )  $\delta$  5.93 – 5.85 (m, 1H), 5.35 (d,  $J = 17.2$  Hz, 1H), 5.27 (d,  $J = 10.5$  Hz, 1H), 4.74 (s, 1H), 4.70 (s, 1H), 4.66 (s, 1H), 4.61 (s, 1H), 4.58 (d,  $J = 5.8$  Hz, 2H), 3.61 (s, 3H), 2.26 (s, 3H), 2.22 – 2.05 (m, 4H), 1.96 (dd,  $J = 14.5, 2.7$  Hz, 1H), 1.88 – 1.58 (m, 5H), 1.71 (s, 3H), 1.67 (s, 3H), 1.63 (s, 3H), 1.61 (s, 3H), 1.43 – 1.34 (m, 3H), 1.15 (s, 3H), 1.04 (s, 3H);  $^{13}\text{C}$  NMR (125 MHz,  $\text{CDCl}_3$ )  $\delta$  204.2, 173.2, 152.6, 147.4, 145.9, 144.5, 140.2, 133.1, 131.2, 123.1, 119.6, 112.8, 109.7, 69.4, 52.6, 50.1, 43.8, 40.7, 38.7, 37.9, 35.4, 32.3, 31.6, 29.5, 28.0, 26.1, 25.1, 22.8, 21.1, 18.4, 17.9.

HRESIMS  $m/z$  537.3197  $[\text{M} + \text{Na}]^+$  (calcd for  $\text{C}_{31}\text{H}_{46}\text{O}_6\text{Na}$ , 537.3187).

### Synthesis of compound 18

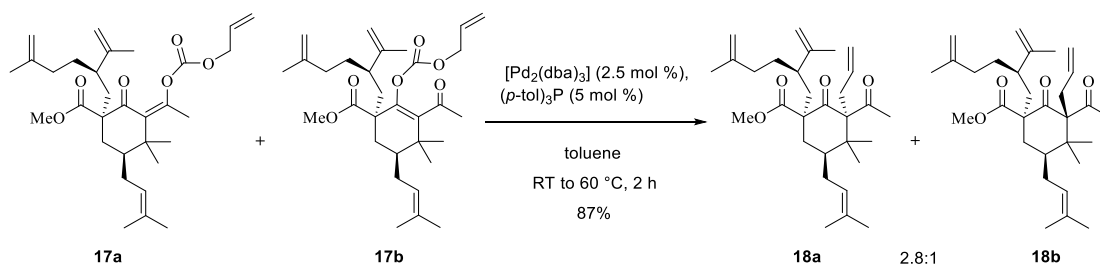

Tris(dibenzylideneacetone)dipalladium(0) (8.3 mg, 0.009 mmol, 0.025 equiv) and tri(*p*-tolyl)phosphine (6.6 mg, 0.0216 mmol, 0.06 equiv) were dissolved in toluene (5 mL) and stirred for 30 min at room temperature. Then, a solution of the pair of regioisomers **17** (185 mg, 0.36 mmol, 1.0 equiv) in toluene (2 mL) was added slowly. The resulting mixture was stirred at 60 °C for 2 h, and then filtered through a plug of silica gel using petroleum ether/ethyl acetate (7:1) to afford C-allylated diketone **18a** and **18b**. The desired product **18a** was purified by HPLC (MeOH/ $\text{H}_2\text{O}$ , 93:7). (108 mg for **18a** and 38 mg for **18b**, 2.8:1, 87% overall yield).

**18a:**  $^1\text{H}$  NMR (500 MHz,  $\text{CDCl}_3$ )  $\delta$  5.36 – 5.28 (m, 1H), 5.10 (t,  $J = 6.0$  Hz, 1H), 4.93 (d,  $J = 10.2$

Hz, 1H), 4.88 (d,  $J = 16.9$  Hz, 1H), 4.80 (s, 1H), 4.76 (s, 1H), 4.67 (s, 1H), 4.63 (s, 1H), 3.74 (s, 3H), 3.17 (dd,  $J = 14.3, 5.0$  Hz, 1H), 2.26 – 2.17 (m, 3H), 2.10 (s, 3H), 1.89 – 1.75 (m, 6H), 1.74 – 1.58 (m, 2H), 1.79 (s, 3H), 1.69 (s, 3H), 1.65 (s, 3H), 1.61 (s, 3H), 1.51 – 1.38 (m, 2H), 1.03 (s, 3H), 0.96 (s, 3H);  $^{13}\text{C}$  NMR (125 MHz,  $\text{CDCl}_3$ )  $\delta$  208.0, 205.6, 172.3, 146.2, 145.1, 133.2, 132.0, 122.0, 116.4, 112.0, 108.7, 72.9, 59.6, 51.5, 42.6, 39.5, 36.9, 36.5, 36.0, 34.4, 32.0, 31.4, 30.1, 27.0, 25.2, 21.8, 21.3, 20.8, 18.1, 17.0.

**HRESIMS**  $m/z$  493.3293  $[\text{M} + \text{Na}]^+$  (calcd for  $\text{C}_{30}\text{H}_{46}\text{O}_4\text{Na}$ , 493.3288).

**18b**:  $^1\text{H}$  NMR (500 MHz,  $\text{CDCl}_3$ )  $\delta$  5.69 – 5.61 (m, 1H), 5.10 – 5.02 (m, 2H), 5.01 (d,  $J = 10.1$  Hz, 1H), 4.77 (s, 1H), 4.68 (s, 1H), 4.66 (s, 1H), 4.61 (s, 1H), 3.74 (s, 3H), 3.04 (dd,  $J = 16.5, 5.7$  Hz, 1H), 2.62 (q,  $J = 8.2$  Hz, 1H), 2.32 – 2.22 (brs, 2H), 2.08 – 2.01 (m, 3H), 2.05 (s, 3H), 1.87 – 1.84 (m, 3H), 1.79 – 1.66 (m, 2H), 1.70 (s, 3H), 1.67 (s, 3H), 1.64 – 1.57 (m, 2H), 1.61 (s, 3H), 1.60 (s, 3H), 1.49 – 1.36 (m, 3H), 0.82 (s, 6H);  $^{13}\text{C}$  NMR (125 MHz,  $\text{CDCl}_3$ )  $\delta$  207.9, 204.8, 172.7, 146.9, 145.9, 135.5, 132.5, 123.4, 117.4, 113.3, 109.8, 75.0, 64.0, 52.4, 44.5, 42.9, 37.9, 36.3, 35.4, 35.2, 32.8, 31.3, 29.9, 29.8, 28.4, 26.2, 24.1, 22.8, 20.0, 18.9, 18.0.

**HRESIMS**  $m/z$  493.3295  $[\text{M} + \text{Na}]^+$  (calcd for  $\text{C}_{30}\text{H}_{46}\text{O}_4\text{Na}$ , 493.3288).

### Synthesis of compound 19

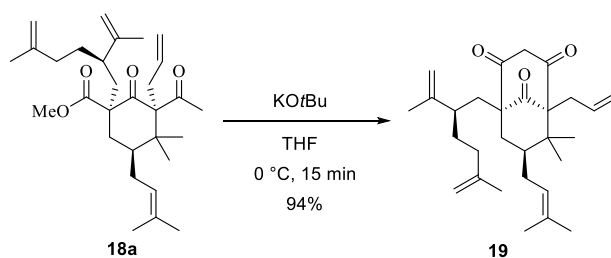

To a solution of diketone **18a** (80 mg, 0.17 mmol, 1.0 equiv) in anhydrous THF (4.5 mL) was added one portion KOtBu (58 mg, 0.51 mmol, 3 equiv) under argon at 0 °C. After stirring for 15 min at this temperature, the reaction was quenched with saturated aq.  $\text{NH}_4\text{Cl}$  and extracted three times with EtOAc. The combined organic layers were washed with brine, dried over  $\text{Na}_2\text{SO}_4$ , filtered and concentrated. Purification of the residue by column chromatography (silica gel, petroleum ether/EtOAc, 15:1) to afford compound **19** (70 mg, 94% yield).

$^1\text{H}$  NMR (500 MHz,  $\text{CDCl}_3$ )  $\delta$  5.69 – 5.60 (m, 1H), 5.08 (d,  $J = 17.1$ , 1H), 5.04 (d,  $J = 10.2$ , 1H),

4.83 (t,  $J = 6.7$  Hz, 1H), 4.68 (d,  $J = 15.7$  Hz, 2H), 4.54 (d,  $J = 11.8$  Hz, 2H), 3.56 (d,  $J = 17.1$  Hz, 2H), 3.40 (d,  $J = 17.2$  Hz, 2H), 2.81 – 2.74 (m, 1H), 2.47 (dd,  $J = 12.5, 8.7$  Hz, 1H), 2.31 (d,  $J = 13.9$  Hz, 1H), 2.16 (brs, 1H), 2.08 (dd,  $J = 14.0, 11.3$  Hz, 1H), 1.97 (dd,  $J = 13.8, 6.3$  Hz, 1H), 1.86 (t,  $J = 8.1$  Hz, 2H), 1.72 (s, 3H), 1.71 – 1.68 (m, 1H), 1.66 (s, 3H), 1.51 (s, 3H), 1.41 (s, 3H), 1.45 – 1.36 (m, 3H), 1.33 – 1.28 (m, 2H), 1.22 (s, 3H), 0.97 (s, 3H);  $^{13}\text{C}$  NMR (125 MHz,  $\text{CDCl}_3$ )  $\delta$  210.8, 202.7, 202.5, 148.6, 146.1, 133.9, 132.5, 122.6, 120.5, 114.6, 109.8, 71.5, 64.0, 63.1, 52.5, 46.8, 44.7, 43.4, 38.4, 35.4, 32.3, 32.2, 29.1, 26.5, 25.9, 23.4, 22.7, 18.1, 16.5.

**HRESIMS**  $m/z$  437.3062  $[\text{M} - \text{H}]^-$  (calcd for  $\text{C}_{29}\text{H}_{41}\text{O}_3$ , 437.3061).

### Synthesis of compound **20**

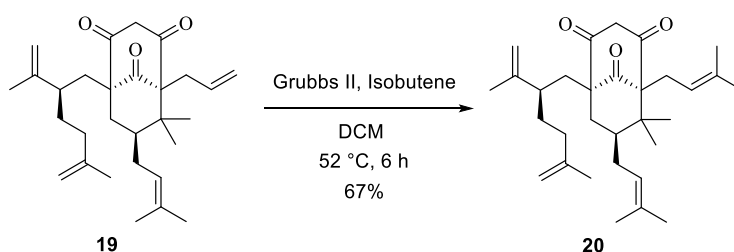

Grubbs 2<sup>nd</sup> generation catalyst (10.2 mg, 0.012 mmol, 0.1 equiv) was added to a dried 15 mL glass pressure tube. The tube was then cooled to  $-78$  °C, compound **19** (53 mg, 0.12 mmol, 1.0 equiv) dissolved in DCM (2 mL) was added quickly under argon. Subsequently, isobutylene (6.8 mL) was condensed along the bottom of the tube at  $-78$  °C. The tube was sealed and slowly warmed to 52 °C. After stirring for 6 h at that temperature, the tube was re-cooled to  $-78$  °C for 5 min before opened to the air. Then, the reaction mixture was allowed to warm to room temperature for evaporation of isobutylene. The resulting solution was concentrated and filtered through a plug of silica gel using petroleum ether/EtOAc (3:1). The product was purified by HPLC (MeOH/ $\text{H}_2\text{O}$ , 93:7) to afford **20** (37.5 mg, 67% yield).

$^1\text{H}$  NMR (600 MHz,  $\text{CDCl}_3$ )  $\delta$  4.91 (t,  $J = 7.3$  Hz, 1H), 4.83 (t,  $J = 6.7$  Hz, 1H), 4.69 (s, 1H), 4.65 (s, 1H), 4.57 (s, 1H), 4.55 (s, 1H), 3.54 (d,  $J = 17.2$  Hz, 1H), 3.46 (d,  $J = 17.3$  Hz, 1H), 2.85 – 2.80 (m, 1H), 2.57 (s, 1H), 2.56 (s, 1H), 2.29 (d,  $J = 13.8$  Hz, 1H), 2.18 – 2.12 (brs, 1H), 2.09 (dd,  $J = 13.8, 11.3$  Hz, 1H), 1.96 (dd,  $J = 13.9, 6.3$  Hz, 1H), 1.90 – 1.82 (m, 2H), 1.73 – 1.69 (m, 1H), 1.72 (s, 3H), 1.66 (s, 3H), 1.64 (s, 3H), 1.62 (s, 3H), 1.50 (s, 3H), 1.47 (s, 3H), 1.46 – 1.36 (m, 3H), 1.31

– 1.27 (m, 1H), 1.24 (s, 3H), 0.97 (s, 3H); <sup>13</sup>C NMR (150 MHz, CDCl<sub>3</sub>) δ 211.2, 203.2, 202.9, 148.7, 146.2, 136.4, 133.8, 122.7, 118.0, 114.5, 109.8, 71.1, 63.8, 63.0, 52.4, 46.8, 44.9, 43.3, 38.4, 35.5, 32.2, 29.1, 27.0, 26.6, 26.2, 25.9, 23.5, 22.7, 18.1, 18.0, 16.6.

MS positive ESIMS *m/z* 467 [M + H]<sup>+</sup>, 489 [M + Na]<sup>+</sup>. HRESIMS *m/z* 489.3342 [M + Na]<sup>+</sup> (calcd for C<sub>29</sub>H<sub>41</sub>O<sub>3</sub>, 489.3339).

### Synthesis of (±)-xanthochymol

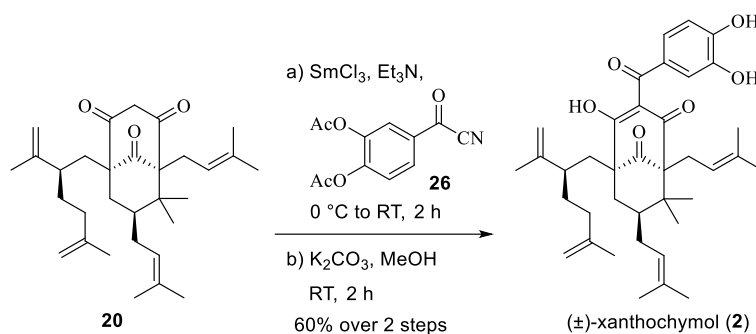

To a solution of compound **20** (23 mg, 0.05 mmol, 1.0 equiv), samarium (III) chloride (4 mg, 0.005 mmol, 0.1 equiv), triethylamine (9 μL, 0.06 mmol, 1.2 equiv) in 3 mL of toluene under argon was stirred at 0 °C for 10 min. After 4-(cyanocarbonyl)-1,2-phenylene diacetate (24.7 mg, 0.1 mmol, 2.0 equiv) was added, the mixture was warmed to room temperature and stirred for 2 hours. Then toluene was evaporated and potassium carbonate (5.6 mg, 0.04 mmol) and methanol (2 mL) were added into the resulting solution and stirred for 2 hours. The reaction was quenched with aq. 2N HCl, and extracted three times with EtOAc. The combined organic layers were washed with brine, dried over Na<sub>2</sub>SO<sub>4</sub>, filtered and concentrated. Purification of the residue by HPLC (MeOH/H<sub>2</sub>O with 0.1% HCOOH, 95:5) to afford (±)-xanthochymol (18.1 mg, 60% overall yield).

### Synthesis of (±)-cycloxanthochymol

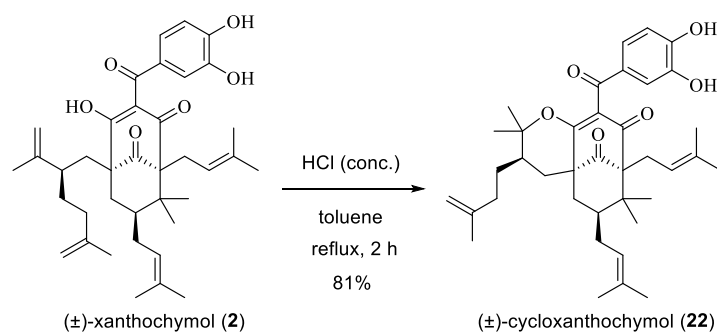



To a solution of (±)-xanthochymol (12 mg, 0.02 mmol, 1.0 equiv) in toluene (5 mL), HCl (37% solution, 5  $\mu$ L) was added under argon. The mixture was refluxed for 2 h and then diluted with water, extracted three times with EtOAc. The combined organic layers were washed with brine, dried over Na<sub>2</sub>SO<sub>4</sub>, filtered and concentrated. Purification of the residue by HPLC (MeOH/H<sub>2</sub>O with 0.1% HCOOH, 95:5) to afford (±)-cycloxanthochymol (9.8 mg, 81% yield).

**<sup>1</sup>H NMR (600 MHz, CD<sub>3</sub>OD)**  $\delta$  7.28 (d,  $J$  = 2.0 Hz, 1H), 6.96 (dd,  $J$  = 8.2, 2.0 Hz, 1H), 6.70 (d,  $J$  = 8.2 Hz, 1H), 4.79 (s, 2H), 4.60 (s, 2H), 3.09 (dd,  $J$  = 14.2, 3.4 Hz, 1H), 2.74 – 2.56 (m, 2H), 2.46 (dd,  $J$  = 13.5, 5.9 Hz, 1H), 2.29 – 2.24 (m, 2H), 2.19 – 2.09 (m, 2H), 2.04 (q,  $J$  = 7.3 Hz, 1H), 1.73 (s, 3H), 1.69 (s, 3H), 1.67 (s, 3H), 1.63 – 1.56 (m, 2H), 1.59 (s, 6H), 1.54 – 1.47 (m, 2H), 1.35 – 1.29 (m, 3H), 1.24 (s, 3H), 1.20 – 1.13 (m, 1H), 1.15 (s, 3H), 1.08 – 0.99 (m, 3H), 1.00 (s, 2H), 0.84 (s, 3H); **<sup>13</sup>C NMR (150 MHz, CD<sub>3</sub>OD)**  $\delta$  207.9, 196.4, 194.2, 173.8, 152.6, 146.7, 146.0, 135.5, 134.0, 131.2, 126.8, 126.3, 124.6, 121.2, 115.9, 115.5, 111.8, 88.5, 69.5, 52.9, 47.5, 47.1, 43.0, 39.8, 36.2, 30.6, 29.4, 28.8, 28.8, 27.0, 26.6, 26.6, 26.1, 22.9, 22.3, 21.5, 18.6, 18.3.

## References

- (1) S. Wolff, W. C. Agosta, *J. Am. Chem. Soc.*, 2002, **105**, 1299-1304.
- (2) K. Żukowska, Ł. Pączek, K. Grela, *Chem. Cat. Chem.*, 2016, **8**, 2817-2823.

## SI-3. The Original NMR and MS Spectra of New Compounds

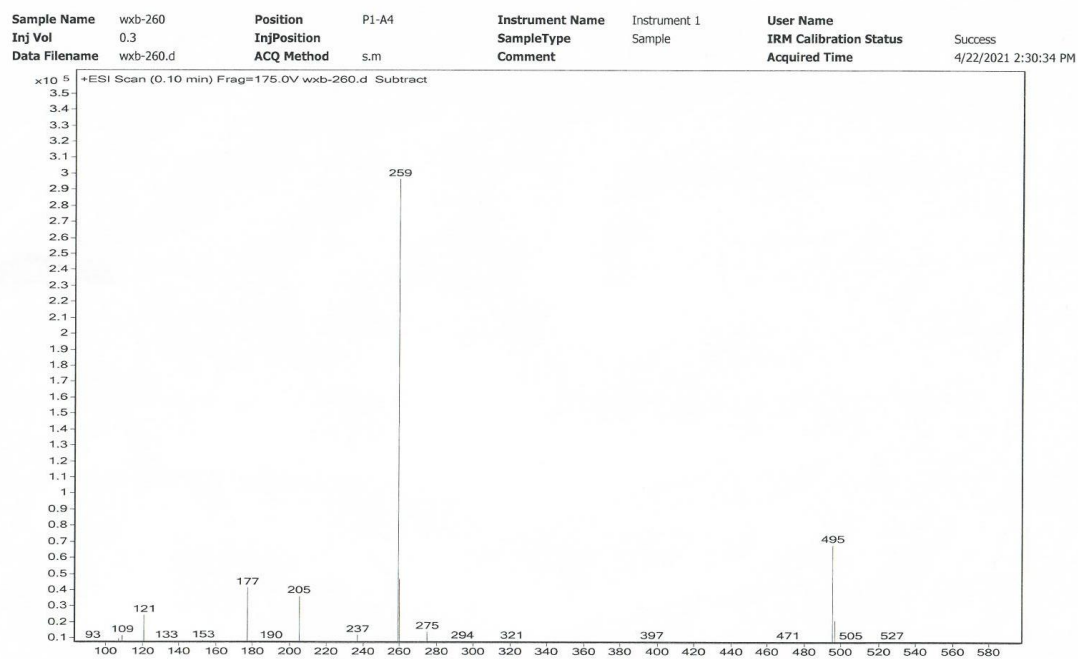

Figure S1. ESIMS of 7.

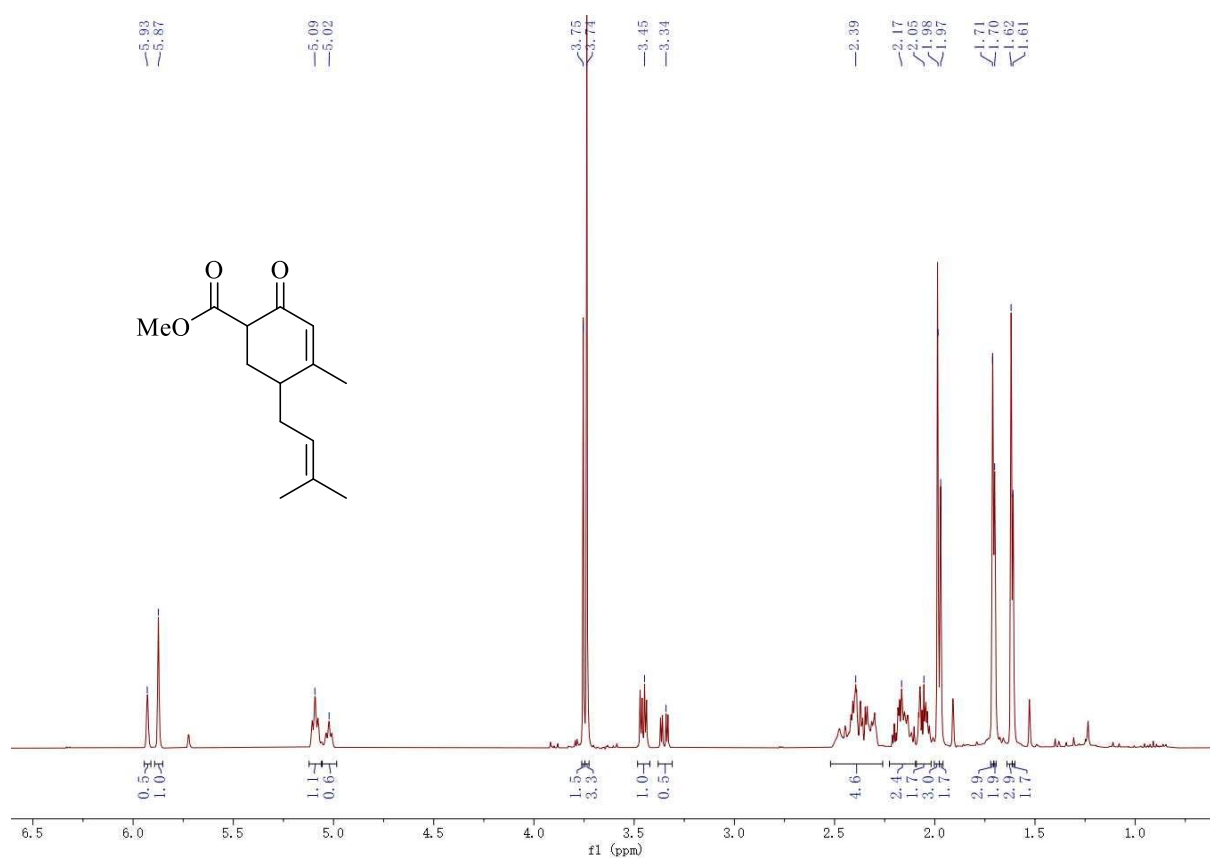

Figure S2. <sup>1</sup>H NMR spectrum of 7 in CDCl<sub>3</sub>.

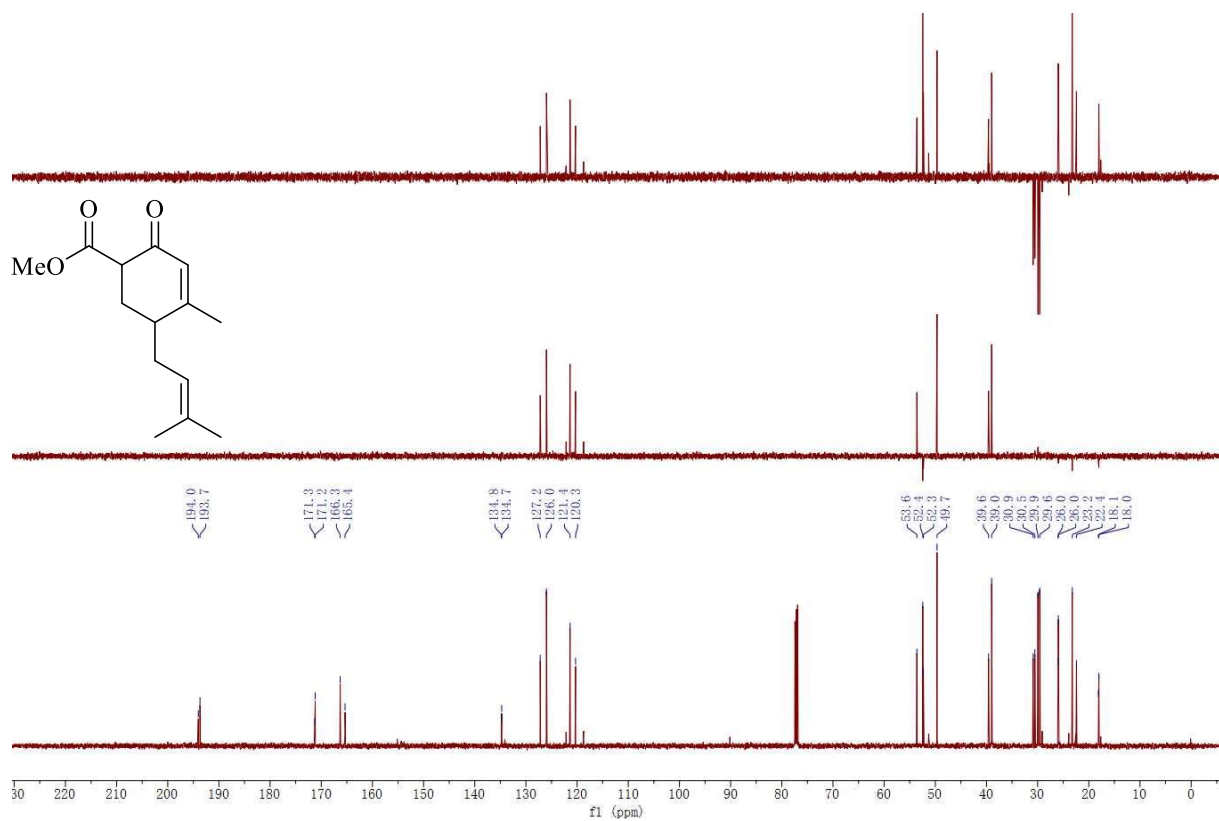

Figure S3. <sup>13</sup>C NMR spectrum of 7 in CDCl<sub>3</sub>.

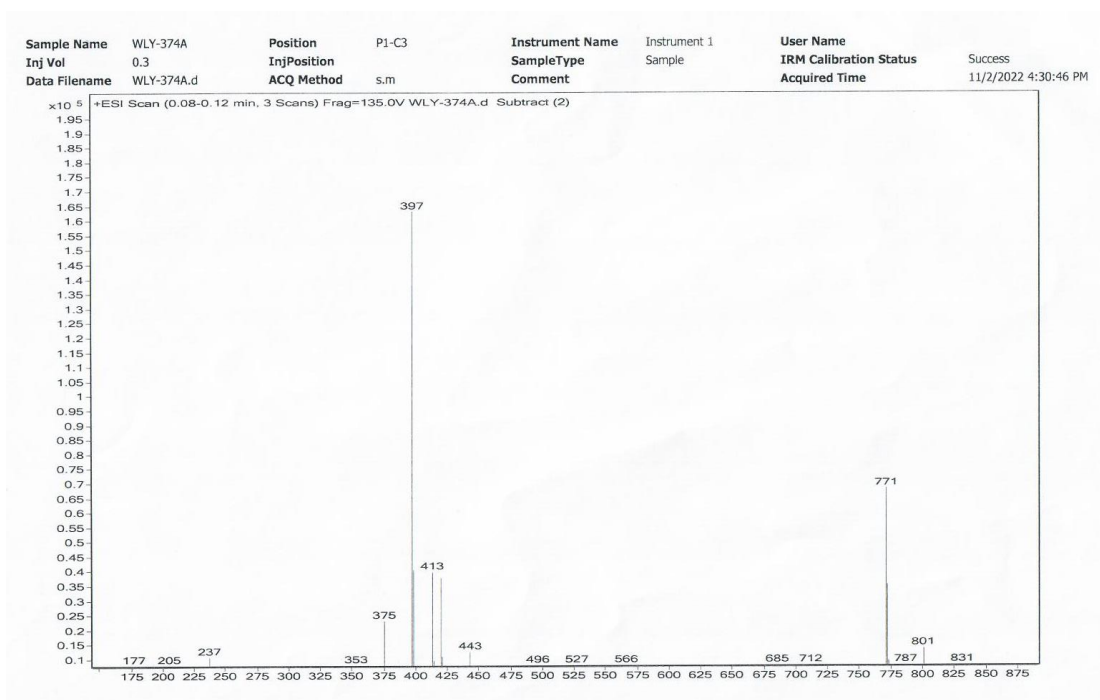

Figure S4. ESIMS of 11a.

## Qualitative Analysis Report

|                        |              |               |                      |
|------------------------|--------------|---------------|----------------------|
| Data Filename          | WLY-374A.d   | Sample Name   | WLY-374A             |
| Sample Type            | Sample       | Position      | P1-C3                |
| Instrument Name        | Instrument 1 | User Name     |                      |
| Acq Method             | s.m          | Acquired Time | 11/2/2022 4:30:46 PM |
| IRM Calibration Status | Success      | DA Method     | PCDL.m               |
| Comment                |              |               |                      |

|                |                             |       |
|----------------|-----------------------------|-------|
| Sample Group   |                             | Info. |
| Acquisition SW | 6200 series TOF/6500 series |       |
| Version        | Q-TOF B.05.01 (B51.25.2)    |       |

### User Spectra

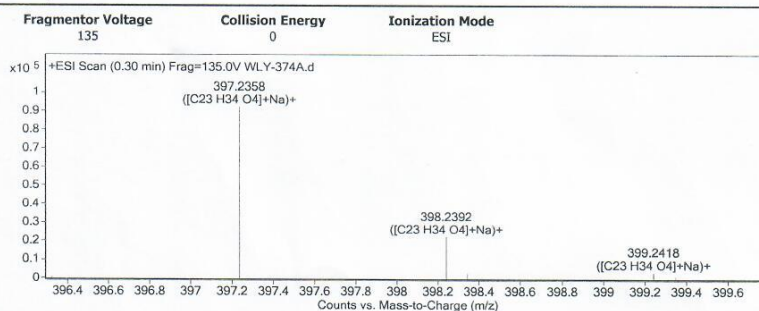

### Peak List

| <i>m/z</i> | <i>z</i> | Abund     | Formula    | Ion     |
|------------|----------|-----------|------------|---------|
| 121.0509   | 1        | 32419.39  |            |         |
| 123.0917   | 1        | 22828.04  |            |         |
| 397.2358   | 1        | 91934.23  | C23 H34 O4 | (M+Na)+ |
| 413.2098   | 1        | 27891.68  |            |         |
| 420.3115   | 1        | 26868.9   |            |         |
| 426.3012   | 1        | 89908.26  |            |         |
| 427.3049   | 1        | 27286.9   |            |         |
| 576.3546   | 1        | 169242.75 |            |         |
| 577.3575   | 1        | 55982.57  |            |         |
| 922.0098   | 1        | 101889.73 |            |         |

### Formula Calculator Element Limits

| Element | Min | Max |
|---------|-----|-----|
| C       | 3   | 60  |
| H       | 0   | 120 |
| O       | 0   | 30  |

### Formula Calculator Results

| Formula    | CalculatedMass | CalculatedMz | Mz       | Diff. (mDa) | Diff. (ppm) | DBE    |
|------------|----------------|--------------|----------|-------------|-------------|--------|
| C23 H34 O4 | 374.2457       | 397.2349     | 397.2358 | -0.90       | -2.27       | 7.0000 |

--- End Of Report ---

**Figure S5. HRESIMS of 11a.**



| Sample Name   | WLY-374A   | Position     | P1-C3 | Instrument Name | Instrument 1 | User Name              |                      |
|---------------|------------|--------------|-------|-----------------|--------------|------------------------|----------------------|
| Inj Vol       | 0.3        | Inj Position |       | Sample Type     | Sample       | IRM Calibration Status | Success              |
| Data Filename | WLY-374A.d | ACQ Method   | s.m   | Comment         |              | Acquired Time          | 11/2/2022 4:30:46 PM |

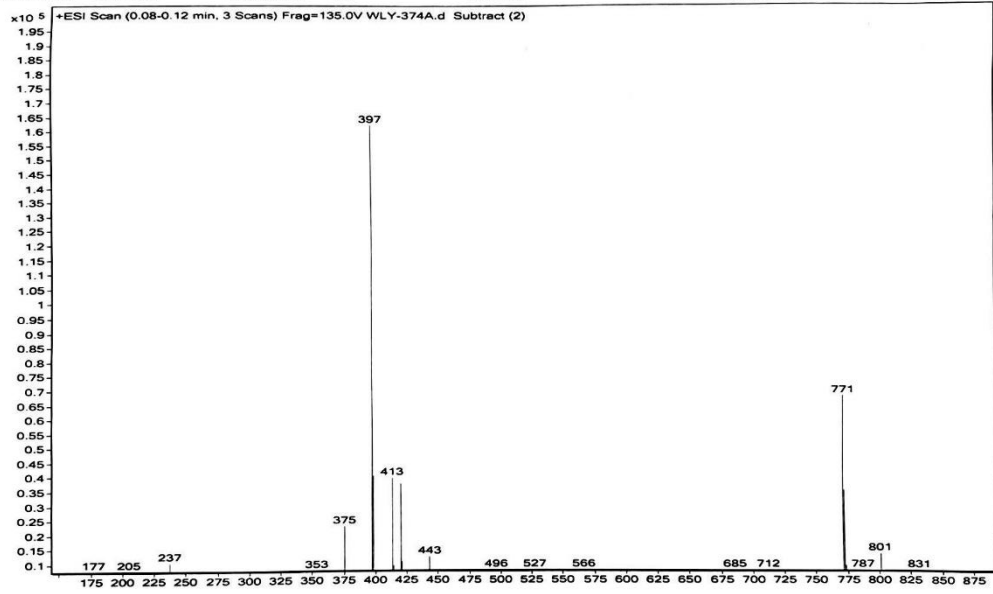

Figure S8. ESIMS of 11b.

## Qualitative Analysis Report

|                        |              |               |                      |
|------------------------|--------------|---------------|----------------------|
| Data Filename          | WLY-374B.d   | Sample Name   | WLY-374B             |
| Sample Type            | Sample       | Position      | P1-C4                |
| Instrument Name        | Instrument 1 | User Name     |                      |
| Acq Method             | s.m          | Acquired Time | 11/2/2022 4:31:57 PM |
| IRM Calibration Status | Success      | DA Method     | PCDL.m               |
| Comment                |              |               |                      |

|                |                             |
|----------------|-----------------------------|
| Sample Group   | Info.                       |
| Acquisition SW | 6200 series TOF/6500 series |
| Version        | Q-TOF B.05.01 (B5125.2)     |

### User Spectra

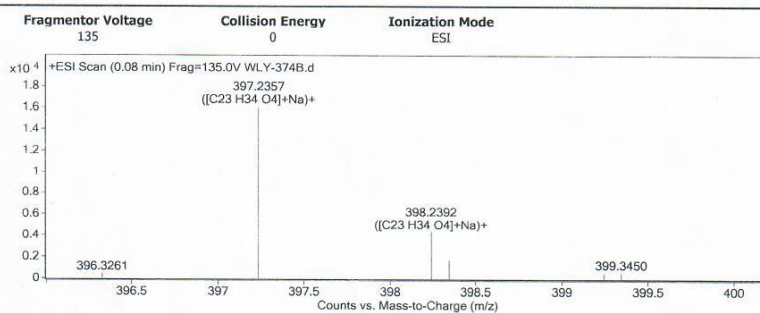

### Peak List

| <i>m/z</i> | z | Abund    | Formula    | Ion     |
|------------|---|----------|------------|---------|
| 121.0509   | 1 | 28877.82 |            |         |
| 123.0917   | 1 | 21653.16 |            |         |
| 397.2357   | 1 | 16017.15 | C23 H34 O4 | (M+Na)+ |
| 413.2094   | 1 | 9873.28  |            |         |
| 426.301    | 1 | 35116.43 |            |         |
| 427.305    | 1 | 9832.37  |            |         |
| 576.3541   | 1 | 65032.89 |            |         |
| 577.3576   | 1 | 25578.9  |            |         |
| 922.0098   | 1 | 89186.45 |            |         |
| 923.012    | 1 | 18342.83 |            |         |

### Formula Calculator Element Limits

| Element | Min | Max |
|---------|-----|-----|
| C       | 3   | 60  |
| H       | 0   | 120 |
| O       | 0   | 30  |

### Formula Calculator Results

| Formula    | CalculatedMass | CalculatedMz | Mz       | Diff. (mDa) | Diff. (ppm) | DBE    |
|------------|----------------|--------------|----------|-------------|-------------|--------|
| C23 H34 O4 | 374.2457       | 397.2349     | 397.2357 | -0.80       | -2.01       | 7.0000 |

--- End Of Report ---

**Figure S9. HRESIMS of 11b.**

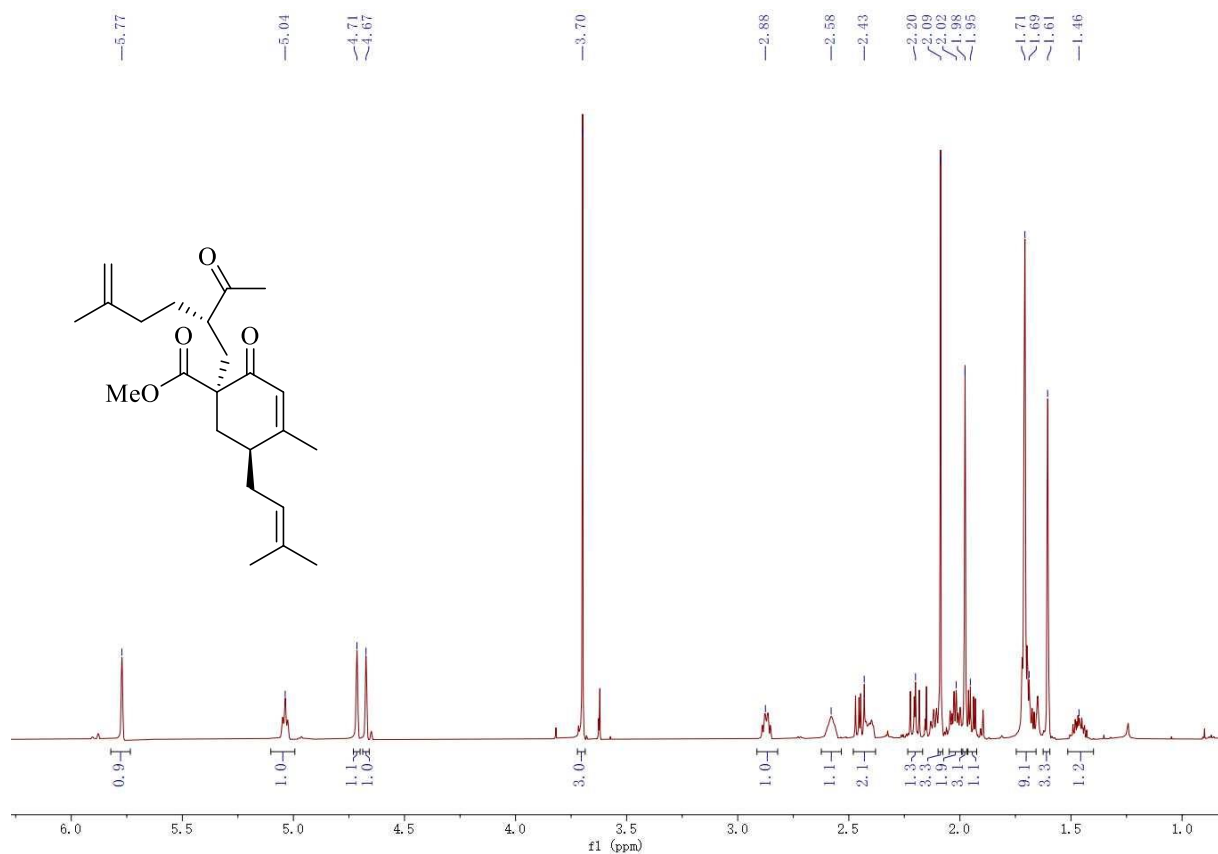

**Figure S10.**  $^1\text{H}$  NMR spectrum of **11b** in  $\text{CDCl}_3$ .

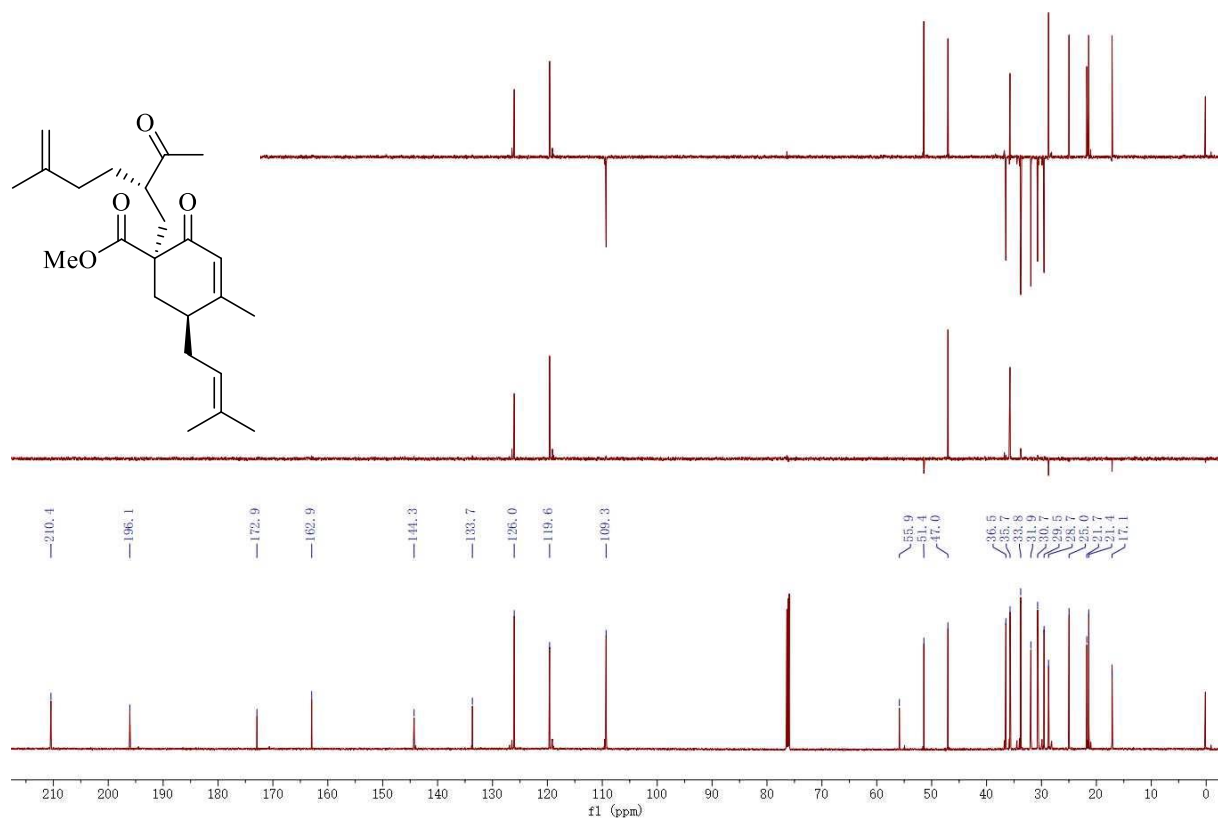

**Figure S11.**  $^{13}\text{C}$  NMR spectrum of **11b** in  $\text{CDCl}_3$ .



|               |           |             |       |                 |              |                        |                       |
|---------------|-----------|-------------|-------|-----------------|--------------|------------------------|-----------------------|
| Sample Name   | wxb-182   | Position    | P1-A1 | Instrument Name | Instrument 1 | User Name              |                       |
| Inj Vol       | 0.3       | InjPosition |       | SampleType      | Sample       | IRM Calibration Status | Success               |
| Data Filename | wxb-182.d | ACQ Method  | s.m   | Comment         |              | Acquired Time          | 12/30/2020 3:07:02 PM |

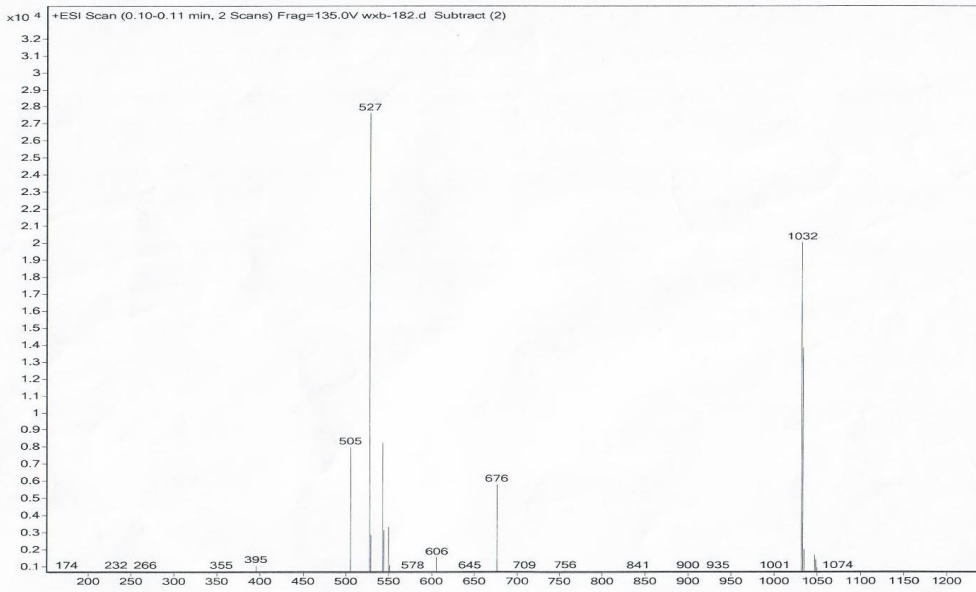

Figure S12. ESIMS of 12.

## Qualitative Analysis Report

|                        |              |               |                      |
|------------------------|--------------|---------------|----------------------|
| Data Filename          | wly-56-1.d   | Sample Name   | wly-56-1             |
| Sample Type            | Sample       | Position      | P1-A3                |
| Instrument Name        | Instrument 1 | User Name     |                      |
| Acq Method             | s.m          | Acquired Time | 2/13/2023 4:06:12 PM |
| IRM Calibration Status | Success      | DA Method     | PCDL.m               |
| Comment                |              |               |                      |

|                |                             |       |
|----------------|-----------------------------|-------|
| Sample Group   |                             | Info. |
| Acquisition SW | 6200 series TOF/6500 series |       |
| Version        | Q-TOF B.05.01 (B5125.2)     |       |

### User Spectra

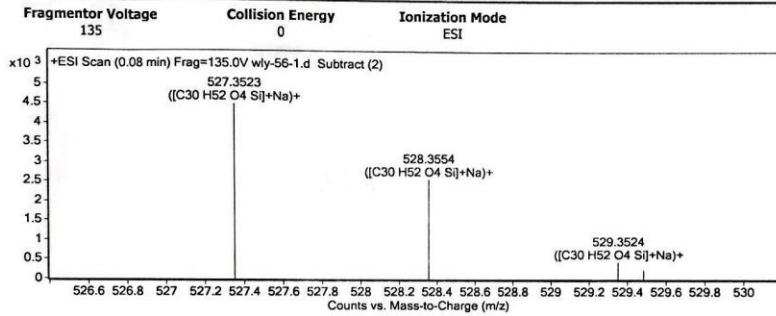

#### Peak List

| m/z      | z | Abund   | Formula       | Ion     |
|----------|---|---------|---------------|---------|
| 94.0402  | 1 | 536.24  |               |         |
| 197.078  | 1 | 536.58  |               |         |
| 205.0859 | 1 | 721.41  |               |         |
| 373.2724 | 1 | 943.29  |               |         |
| 414.221  | 1 | 547.32  |               |         |
| 505.3707 | 1 | 4309.92 |               |         |
| 506.3741 | 1 | 1487.59 |               |         |
| 527.3523 | 1 | 4514.11 | C30 H52 O4 Si | (M+Na)+ |
| 528.3554 | 1 | 2592.71 | C30 H52 O4 Si | (M+Na)+ |
| 543.3266 | 1 | 919.06  |               |         |

#### Formula Calculator Element Limits

| Element | Min | Max |
|---------|-----|-----|
| C       | 3   | 100 |
| H       | 0   | 200 |
| O       | 0   | 20  |
| Si      | 0   | 1   |

#### Formula Calculator Results

| Formula       | CalculatedMass | CalculatedMz | Mz       | Diff. (mDa) | Diff. (ppm) | DBE    |
|---------------|----------------|--------------|----------|-------------|-------------|--------|
| C30 H52 O4 Si | 504.3635       | 527.3527     | 527.3523 | 0.40        | 0.76        | 6.0000 |

--- End Of Report ---

**Figure S13. HRESIMS of 12.**

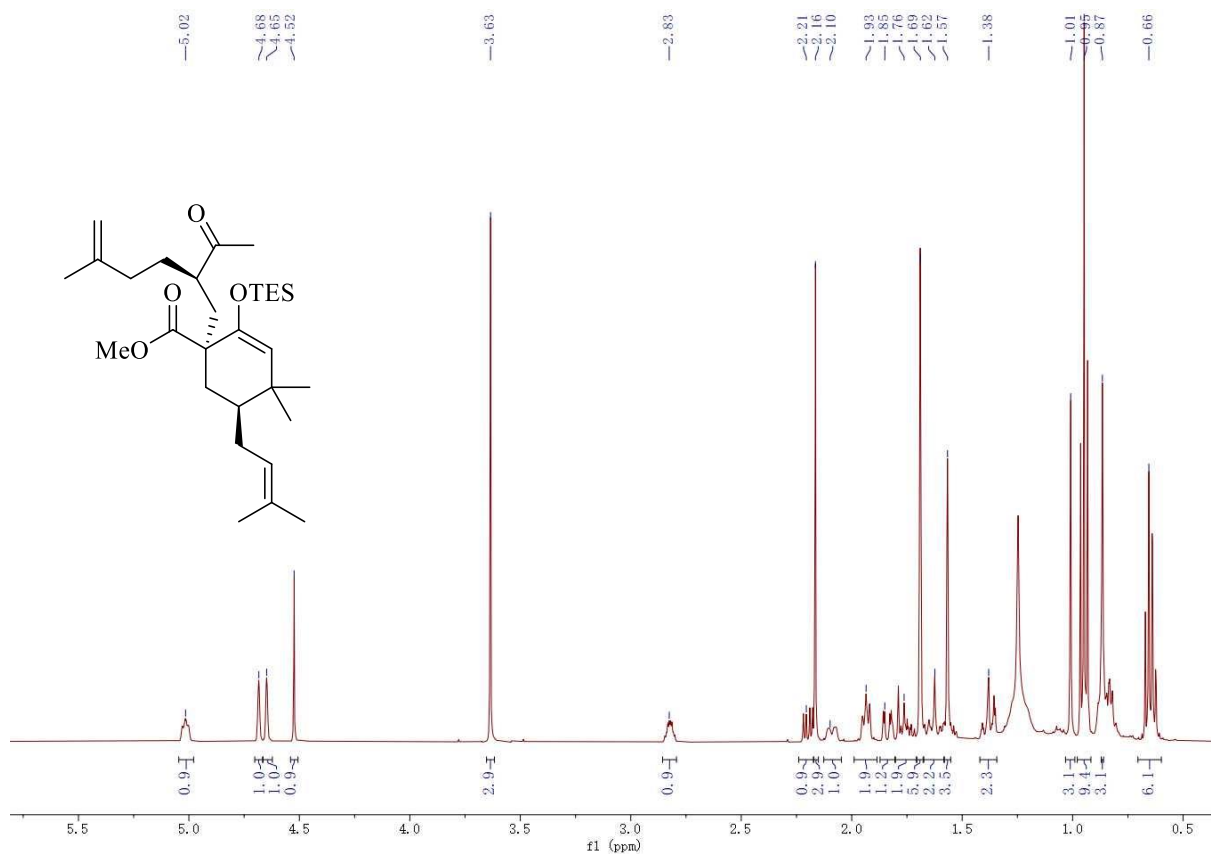

**Figure S14.**  $^1\text{H}$  NMR spectrum of **12** in CDCl<sub>3</sub>.

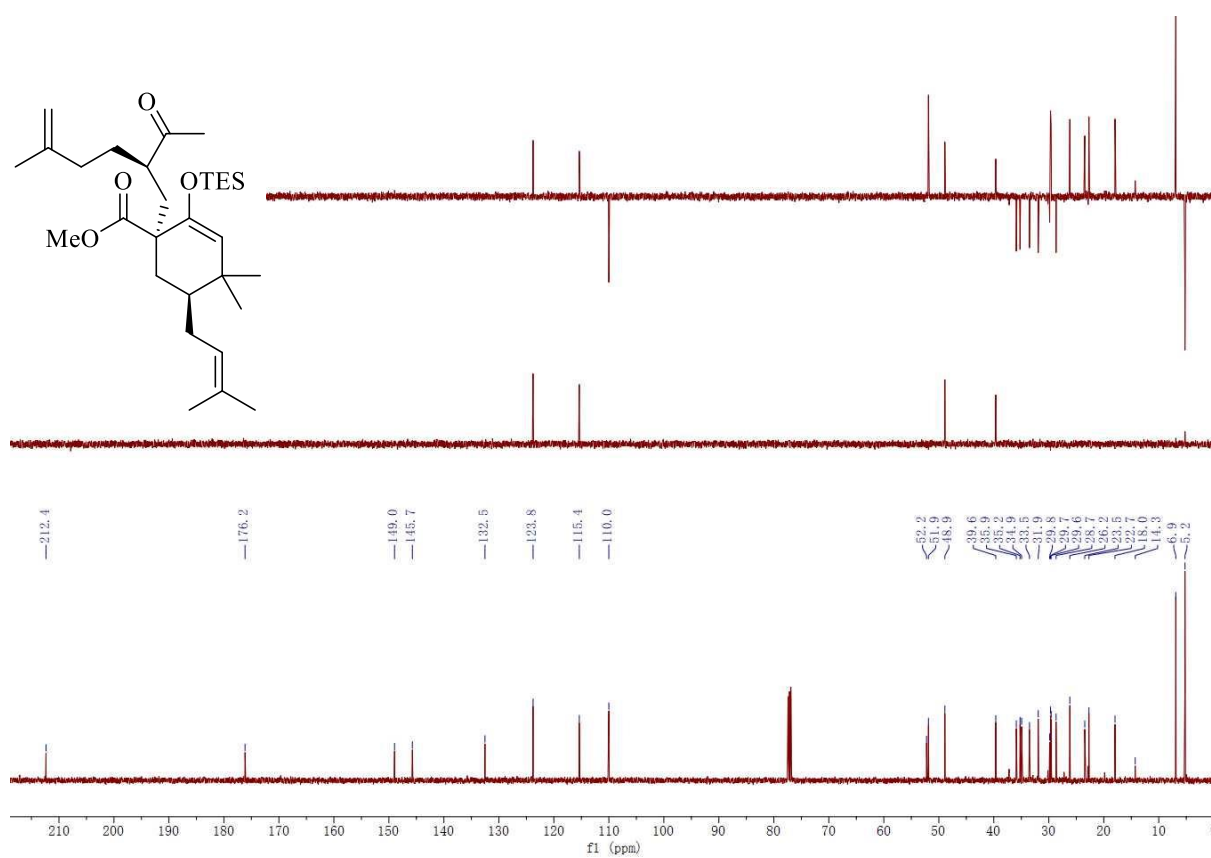

**Figure S15.**  $^{13}\text{C}$  NMR spectrum of **12** in CDCl<sub>3</sub>.

| Sample Name   | WLY-255-P   | Position    | P1-C2 | Instrument Name | Instrument 1 | User Name              |                      |
|---------------|-------------|-------------|-------|-----------------|--------------|------------------------|----------------------|
| Inj Vol       | 1           | InjPosition |       | SampleType      | Sample       | IRM Calibration Status | Success              |
| Data Filename | WLY-255-P.d | ACQ Method  | s.m   | Comment         |              | Acquired Time          | 2/16/2023 2:13:18 PM |

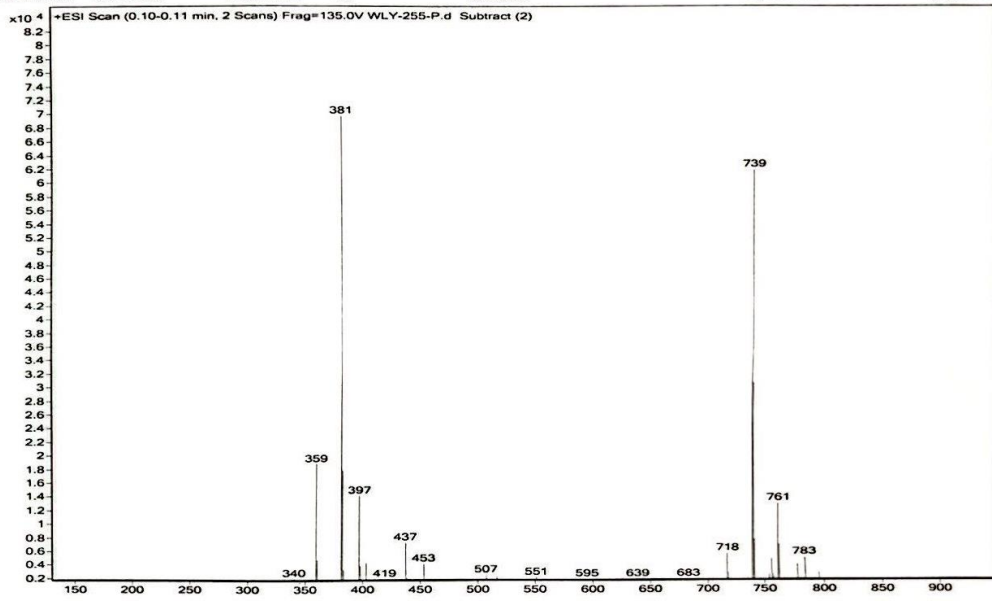

Figure S16. ESIMS of 13.

## Qualitative Analysis Report

|                        |              |               |                      |
|------------------------|--------------|---------------|----------------------|
| Data Filename          | WLY-255-P.d  | Sample Name   | WLY-255-P            |
| Sample Type            | Sample       | Position      | P1-C2                |
| Instrument Name        | Instrument 1 | User Name     |                      |
| Acq Method             | s.m          | Acquired Time | 2/16/2023 2:13:18 PM |
| IRM Calibration Status | Success      | DA Method     | PCDL.m               |
| Comment                |              |               |                      |

|                |                             |       |
|----------------|-----------------------------|-------|
| Sample Group   |                             | Info. |
| Acquisition SW | 6200 series TOF/6500 series |       |
| Version        | Q-TOF B.05.01 (B5125.2)     |       |

### User Spectra

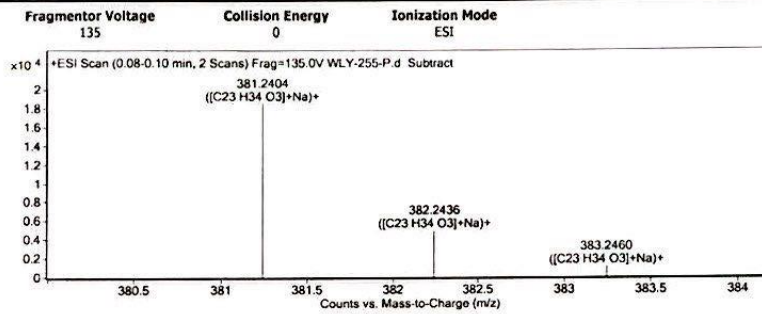

#### Peak List

| m/z      | z | Abund    | Formula    | Ion     |
|----------|---|----------|------------|---------|
| 359.2589 | 1 | 6923.14  |            |         |
| 381.2404 | 1 | 18536.19 | C23 H34 O3 | (M+Na)+ |
| 382.2436 | 1 | 4913.63  | C23 H34 O3 | (M+Na)+ |
| 397.218  | 1 | 2812.57  |            |         |
| 437.1941 | 1 | 2134.92  |            |         |
| 717.5096 | 1 | 1912.54  |            |         |
| 739.4929 | 1 | 12362.87 |            |         |
| 740.4954 | 1 | 7010.28  |            |         |
| 761.4733 | 1 | 2116.29  |            |         |
| 922.0098 | 1 | 10543.73 |            |         |

#### Formula Calculator Element Limits

| Element | Min | Max |
|---------|-----|-----|
| C       | 3   | 60  |
| H       | 0   | 200 |
| O       | 0   | 20  |

#### Formula Calculator Results

| Formula    | CalculatedMass | CalculatedMz | Mz       | Diff. (mDa) | Diff. (ppm) | DBE    |
|------------|----------------|--------------|----------|-------------|-------------|--------|
| C23 H34 O3 | 358.2508       | 381.2400     | 381.2404 | -0.40       | -1.05       | 7.0000 |

--- End Of Report ---

Figure S17. HRESIMS of 13.

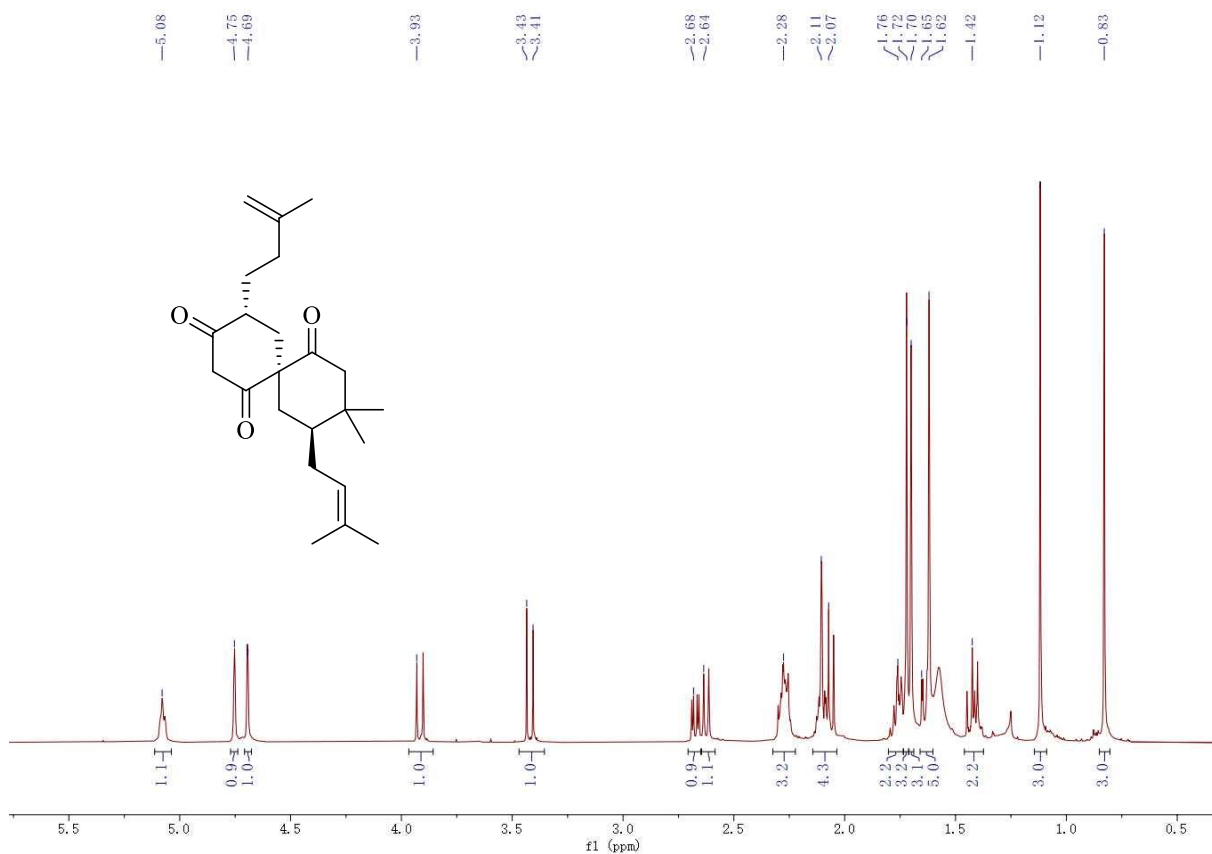

**Figure S18.** <sup>1</sup>H NMR spectrum of **13** in CDCl<sub>3</sub>.

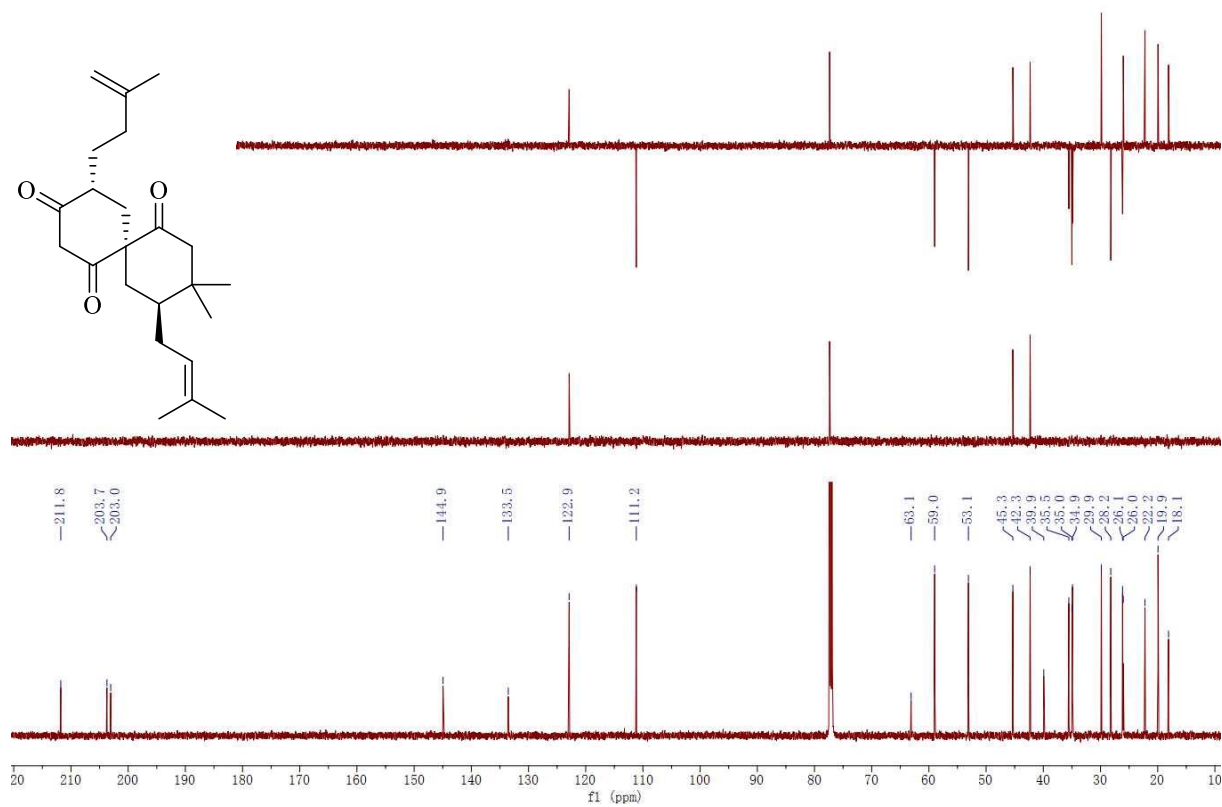

**Figure S19.** <sup>13</sup>C NMR spectrum of **13** in CDCl<sub>3</sub>.

## Qualitative Analysis Report

|                        |              |               |                      |
|------------------------|--------------|---------------|----------------------|
| Data Filename          | wxb-232.d    | Sample Name   | wxb-232              |
| Sample Type            | Sample       | Position      | P1-A1                |
| Instrument Name        | Instrument 1 | User Name     |                      |
| Acq Method             | s.m          | Acquired Time | 3/18/2021 9:33:53 AM |
| IRM Calibration Status | Success      | DA Method     | Default.m            |
| Comment                |              |               |                      |

|                |                             |
|----------------|-----------------------------|
| Sample Group   | Info.                       |
| Acquisition SW | 6200 series TOF/6500 series |
| Version        | Q-TOF B.05.01 (B5125.2)     |

### User Spectra

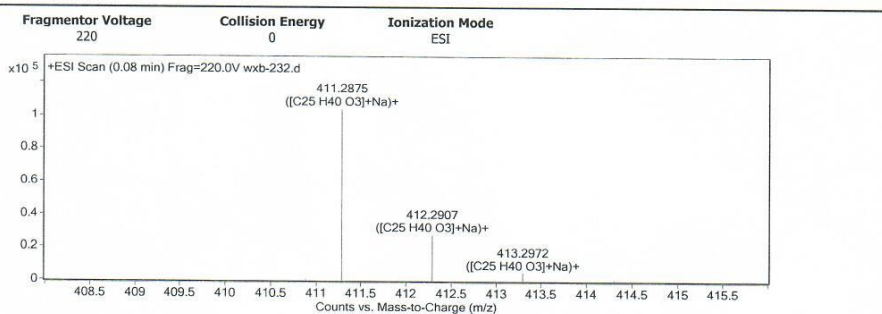

#### Peak List

| m/z      | z | Abund     | Formula    | Ion     |
|----------|---|-----------|------------|---------|
| 128.9533 |   | 20770.53  |            |         |
| 411.2875 | 1 | 103920.65 | C25 H40 O3 | (M+Na)+ |
| 412.2907 | 1 | 27546.24  | C25 H40 O3 | (M+Na)+ |
| 427.3181 | 1 | 17732.37  |            |         |
| 799.5851 | 1 | 26121.45  |            |         |
| 800.5885 | 1 | 11877.6   |            |         |
| 801.5912 | 1 | 5134.71   |            |         |
| 815.6172 | 1 | 9831.85   |            |         |
| 816.619  | 1 | 5399.65   |            |         |
| 959.9647 | 1 | 13225.54  |            |         |

#### Formula Calculator Element Limits

| Element | Min | Max |
|---------|-----|-----|
| C       | 3   | 120 |
| H       | 0   | 240 |
| O       | 0   | 30  |

#### Formula Calculator Results

| Formula    | CalculatedMass | CalculatedMz | Mz       | Diff. (mDa) | Diff. (ppm) | DBE    |
|------------|----------------|--------------|----------|-------------|-------------|--------|
| C25 H40 O3 | 388.2978       | 411.2870     | 411.2875 | -0.50       | -1.22       | 6.0000 |

--- End Of Report ---

**Figure S20. HRESIMS of 14.**



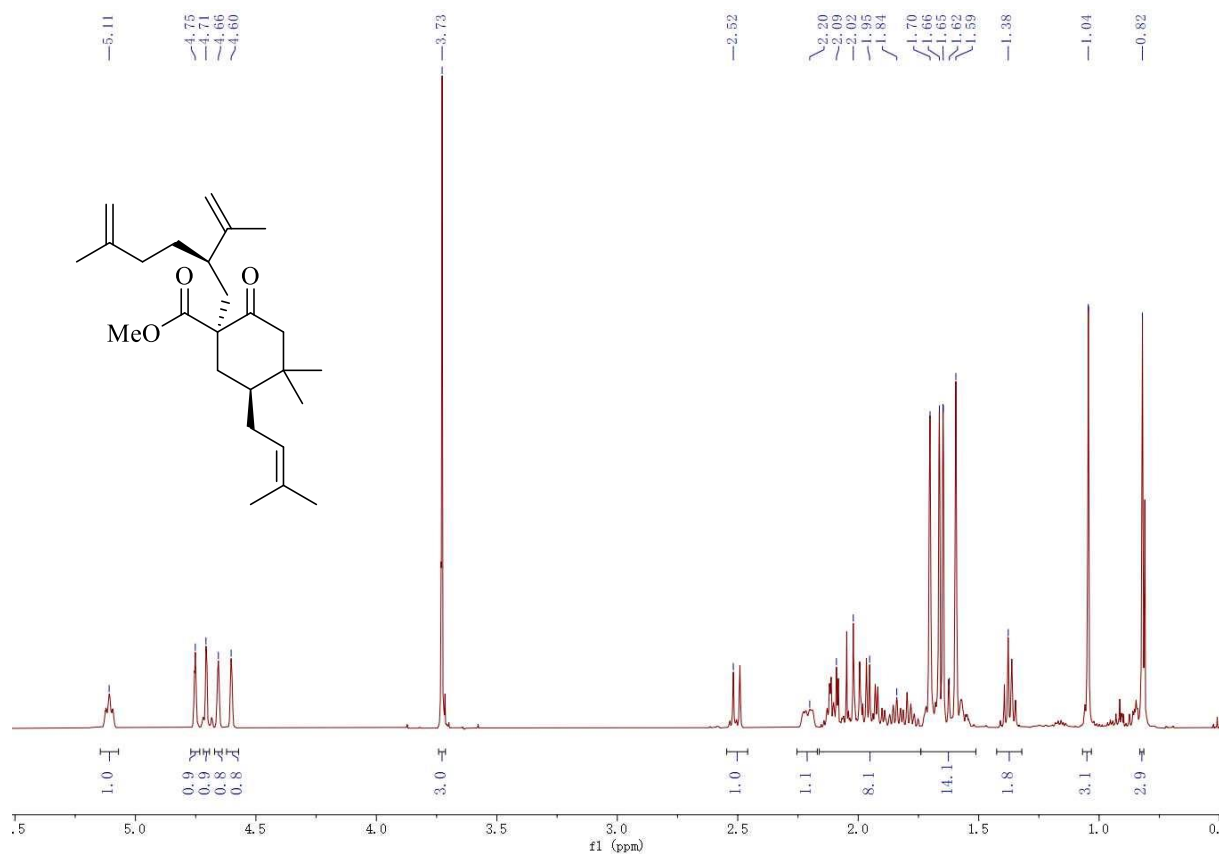

Figure S21. <sup>1</sup>H NMR spectrum of 14 in CDCl<sub>3</sub>.

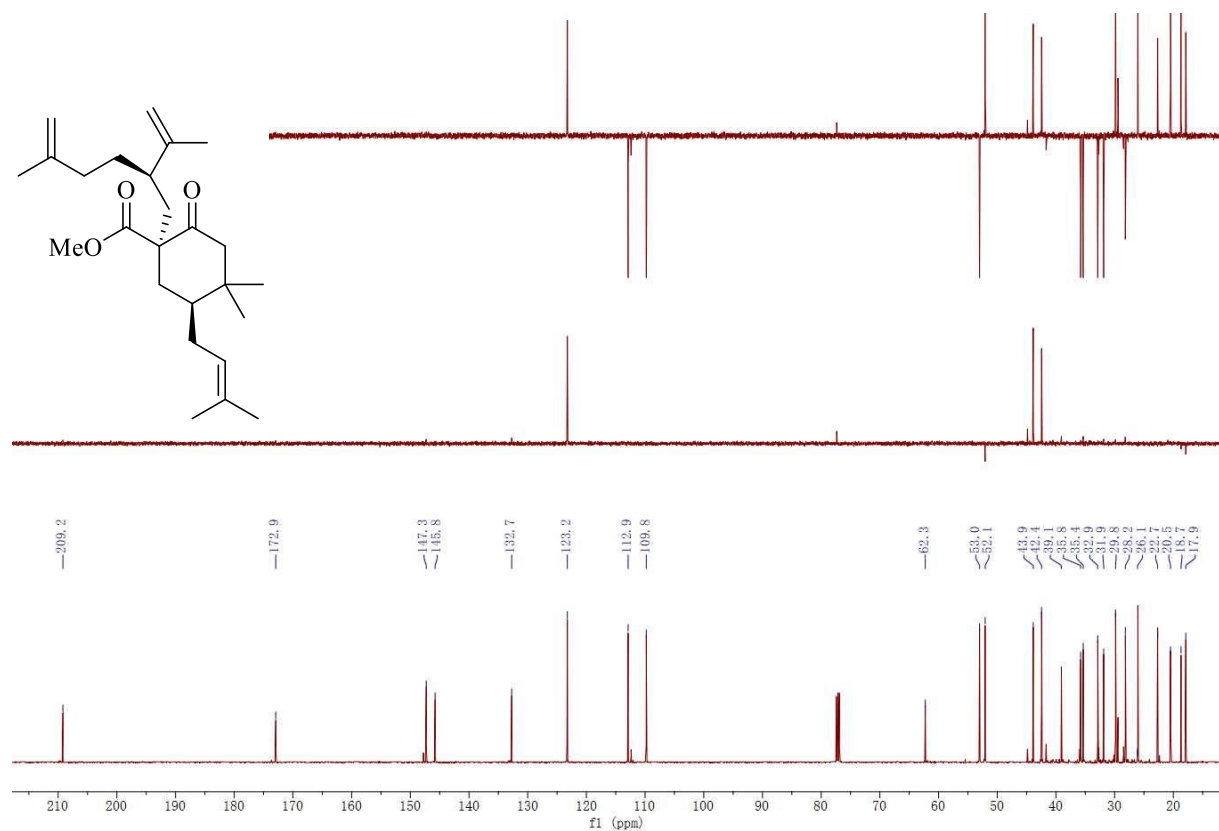

Figure S22. <sup>13</sup>C NMR spectrum of 14 in CDCl<sub>3</sub>.



|               |             |             |       |                 |              |                        |                     |
|---------------|-------------|-------------|-------|-----------------|--------------|------------------------|---------------------|
| Sample Name   | wxb-247-h   | Position    | P1-B3 | Instrument Name | Instrument 1 | User Name              |                     |
| Inj Vol       | 0.3         | InjPosition |       | SampleType      | Sample       | IRM Calibration Status | Success             |
| Data Filename | wxb-247-h.d | ACQ Method  | s.m   | Comment         |              | Acquired Time          | 4/1/2021 9:25:21 AM |

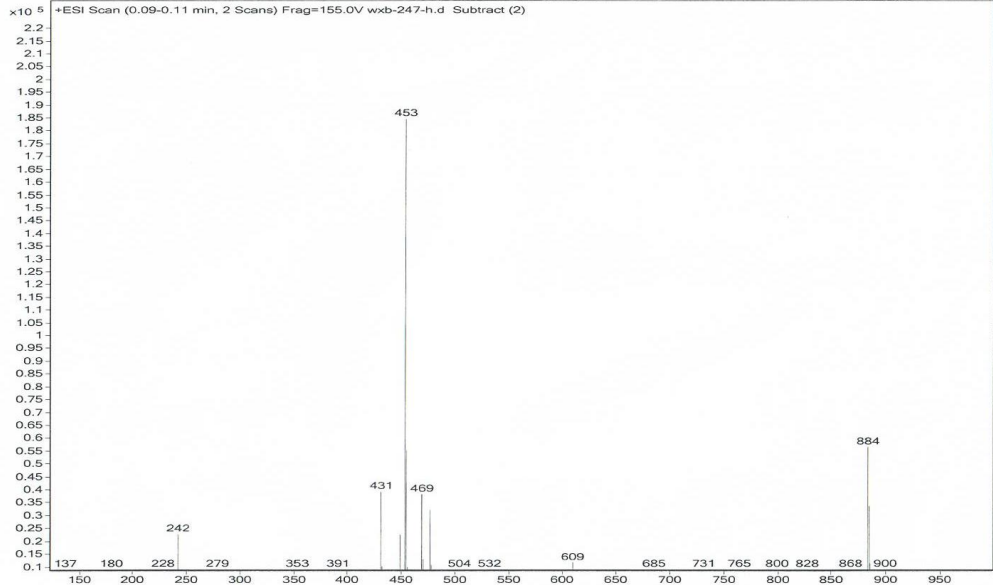

Figure S23. ESIMS of 16.

## Qualitative Analysis Report

|                        |              |               |                     |
|------------------------|--------------|---------------|---------------------|
| Data Filename          | wxb-247-h.d  | Sample Name   | wxb-247-h           |
| Sample Type            | Sample       | Position      | P1-B3               |
| Instrument Name        | Instrument 1 | User Name     |                     |
| Acq Method             | s.m          | Acquired Time | 4/1/2021 9:25:21 AM |
| IRM Calibration Status | Success      | DA Method     | Default.m           |
| Comment                |              |               |                     |

Sample Group Info.  
 Acquisition SW 6200 series TOF/6500 series  
 Version Q-TOF B.05.01 (B5125.2)

### User Spectra

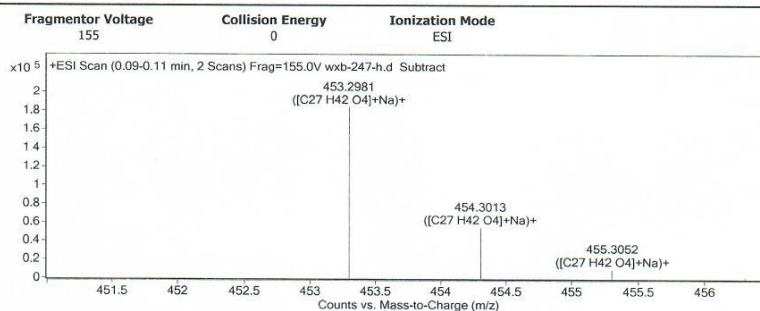

#### Peak List

| m/z      | z | Abund     | Formula    | Ion     |
|----------|---|-----------|------------|---------|
| 242.2847 | 1 | 22669.49  |            |         |
| 431.316  | 1 | 39134.65  |            |         |
| 448.3424 | 1 | 22609.05  |            |         |
| 453.2981 | 1 | 184522.42 | C27 H42 O4 | (M+Na)+ |
| 454.3013 | 1 | 55140.71  | C27 H42 O4 | (M+Na)+ |
| 469.2752 | 1 | 38066.14  |            |         |
| 470.2777 | 1 | 12853.61  |            |         |
| 476.3738 | 1 | 32110.84  |            |         |
| 883.6067 | 1 | 56496.33  |            |         |
| 884.6098 | 1 | 33506.25  |            |         |

#### Formula Calculator Element Limits

| Element | Min | Max |
|---------|-----|-----|
| C       | 3   | 60  |
| H       | 0   | 120 |
| O       | 0   | 30  |

#### Formula Calculator Results

| Formula    | CalculatedMass | CalculatedMz | Mz       | Diff. (mDa) | Diff. (ppm) | DBE    |
|------------|----------------|--------------|----------|-------------|-------------|--------|
| C27 H42 O4 | 430.3083       | 453.2975     | 453.2981 | -0.60       | -1.32       | 7.0000 |

--- End Of Report ---

**Figure S24. HRESIMS of 16.**

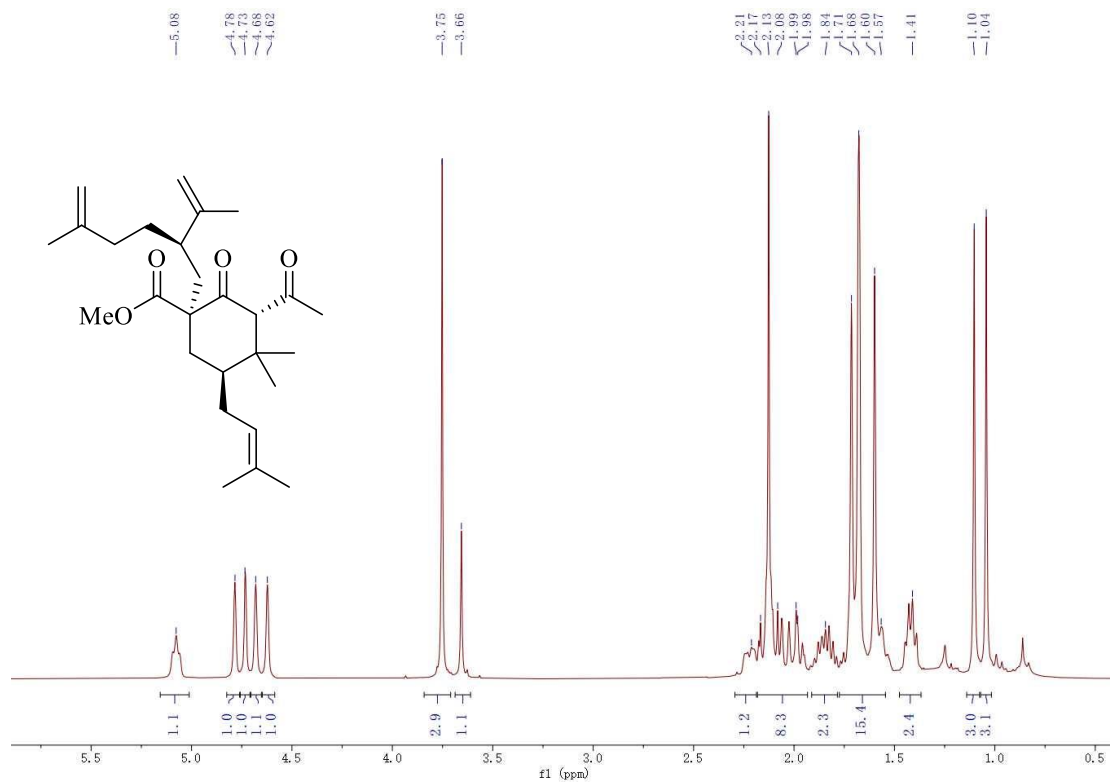

Figure S25. <sup>1</sup>H NMR spectrum of 16a in CDCl<sub>3</sub>.

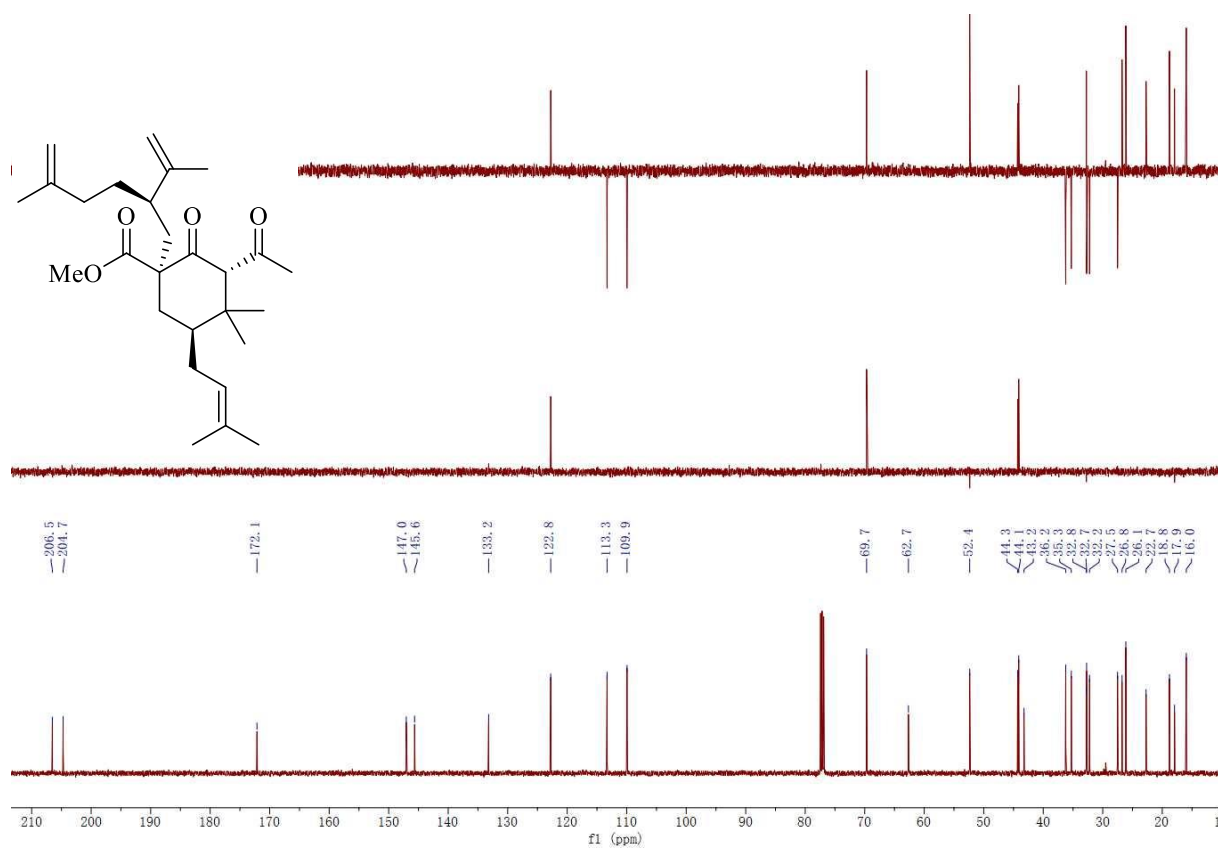

Figure S26. <sup>13</sup>C NMR spectrum of 16a in CDCl<sub>3</sub>.

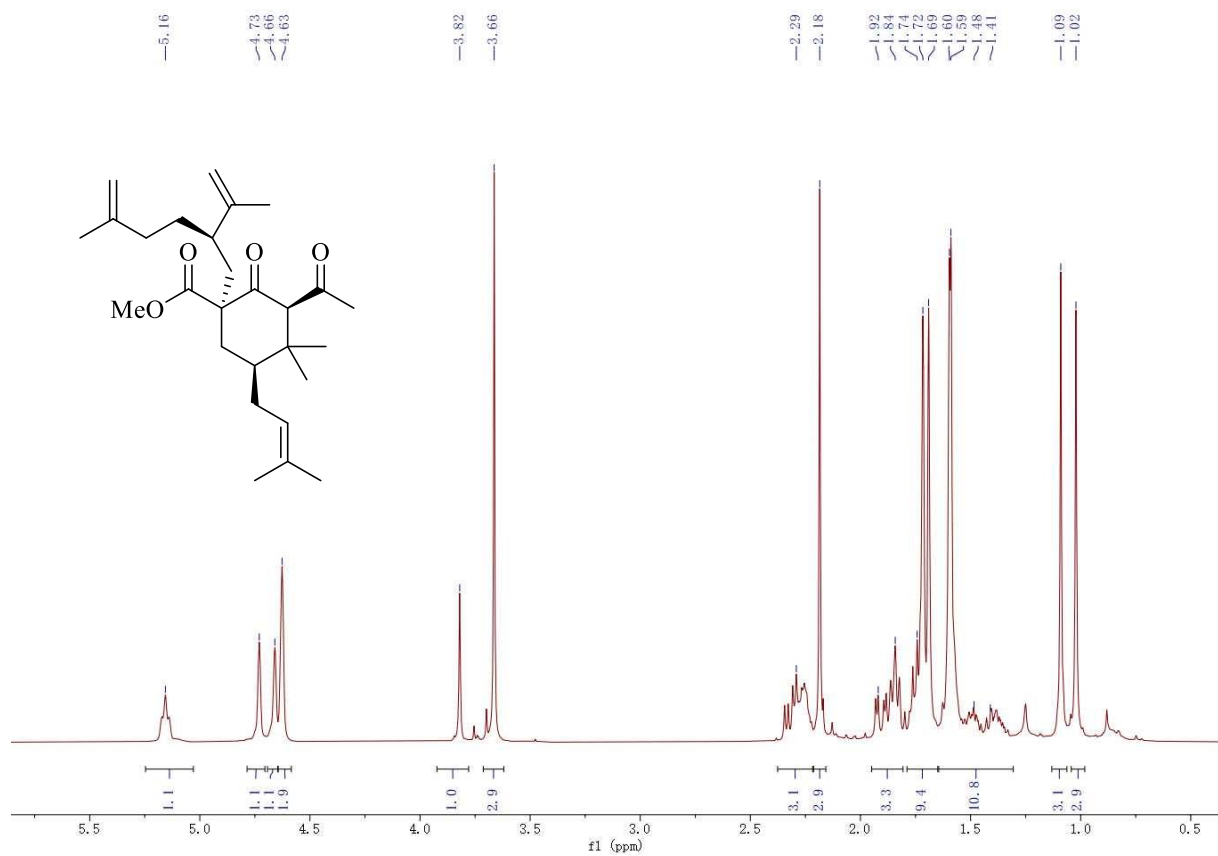

Figure S27. <sup>1</sup>H NMR spectrum of **16b** in CDCl<sub>3</sub>.

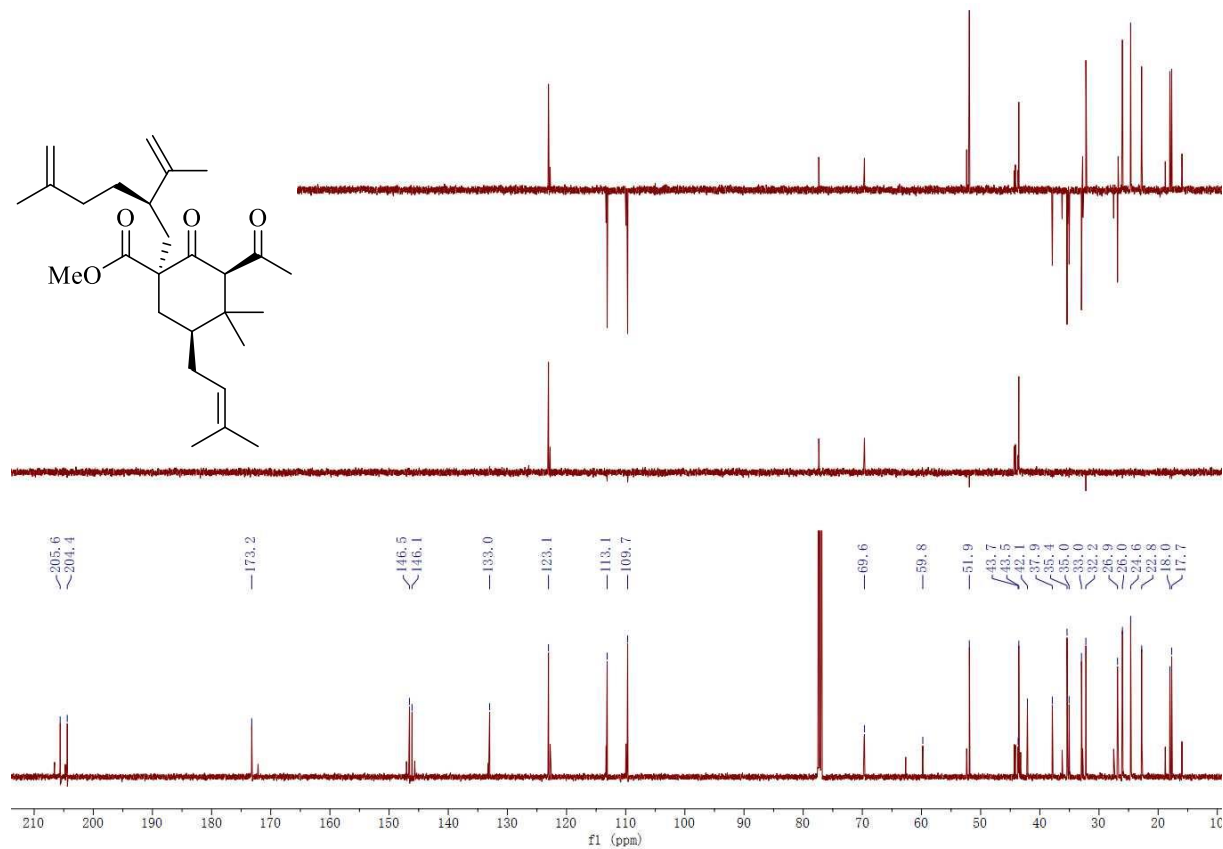

Figure S28. <sup>13</sup>C NMR spectrum of **16b** in CDCl<sub>3</sub>.

|               |             |             |       |                 |              |                        |                       |
|---------------|-------------|-------------|-------|-----------------|--------------|------------------------|-----------------------|
| Sample Name   | wxb-269-1   | Position    | P1-A1 | Instrument Name | Instrument 1 | User Name              |                       |
| Inj Vol       | 0.3         | InjPosition |       | SampleType      | Sample       | IRM Calibration Status | Success               |
| Data Filename | wxb-269-1.d | ACQ Method  | s.m   | Comment         |              | Acquired Time          | 5/12/2021 10:41:11 AM |

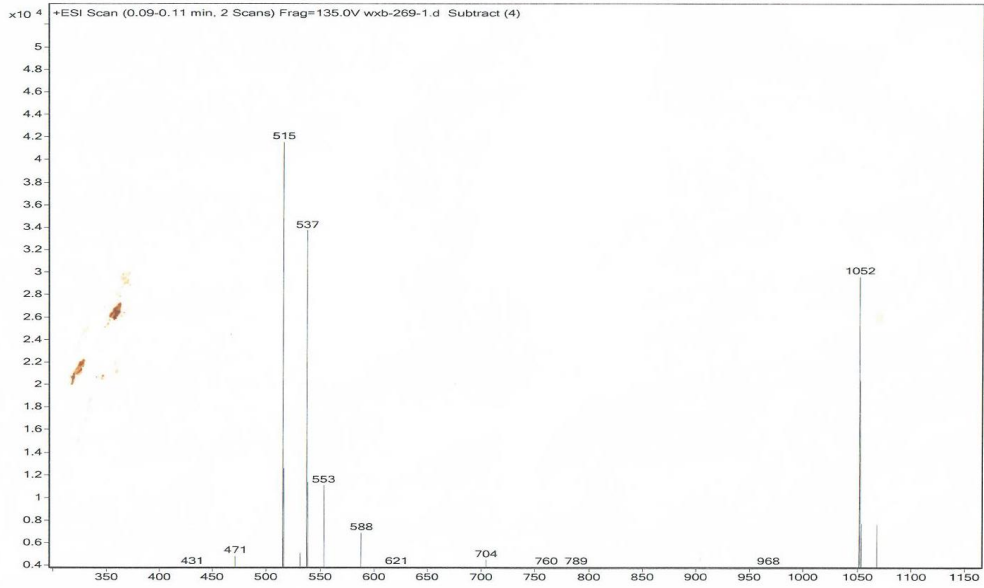

**Figure S29.** ESIMS of 17a.

## Qualitative Analysis Report

|                        |              |               |                       |
|------------------------|--------------|---------------|-----------------------|
| Data Filename          | wxb-269-1.d  | Sample Name   | wxb-269-1             |
| Sample Type            | Sample       | Position      | P1-A1                 |
| Instrument Name        | Instrument 1 | User Name     |                       |
| Acq Method             | s.m          | Acquired Time | 5/12/2021 10:48:39 AM |
| IRM Calibration Status | Success      | DA Method     | Default.m             |
| Comment                |              |               |                       |

Sample Group Info.  
 Acquisition SW 6200 series TOF/6500 series  
 Version Q-TOF B.05.01 (B5125.2)

### User Spectra

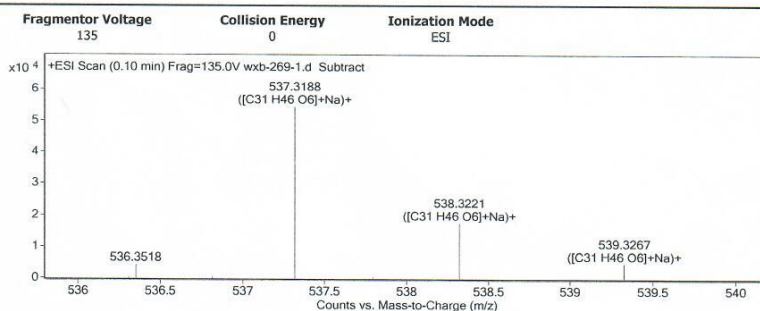

#### Peak List

| m/z       | z | Abund    | Formula    | Ion     |
|-----------|---|----------|------------|---------|
| 102.1288  | 1 | 79509.98 |            |         |
| 130.1598  | 1 | 74187.02 |            |         |
| 153.1389  | 1 | 24169.68 |            |         |
| 242.2849  | 1 | 40659.8  |            |         |
| 264.2327  | 1 | 27779.49 |            |         |
| 515.3366  | 1 | 53373.25 |            |         |
| 537.3188  | 1 | 54265.02 | C31 H46 O6 | (M+Na)+ |
| 704.4148  | 1 | 44123.65 |            |         |
| 1051.6445 | 1 | 39641.26 |            |         |
| 1052.6478 | 1 | 25778.69 |            |         |

#### Formula Calculator Element Limits

| Element | Min | Max |
|---------|-----|-----|
| C       | 3   | 60  |
| H       | 0   | 120 |
| O       | 0   | 30  |

#### Formula Calculator Results

| Formula    | CalculatedMass | CalculatedMz | Mz       | Diff. (mDa) | Diff. (ppm) | DBE    |
|------------|----------------|--------------|----------|-------------|-------------|--------|
| C31 H46 O6 | 514.3294       | 537.3187     | 537.3188 | -0.10       | -0.19       | 9.0000 |

--- End Of Report ---

**Figure S30. HRESIMS of 17a.**

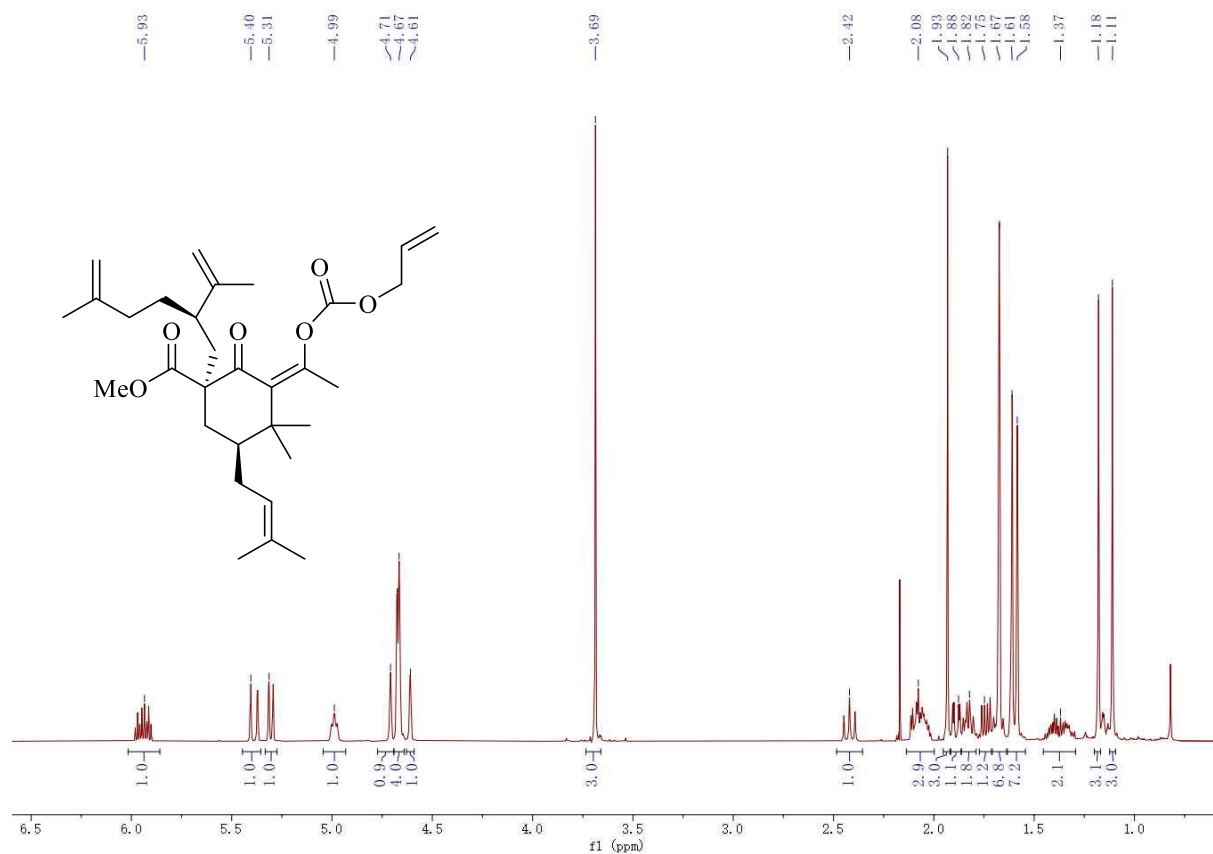

**Figure S31.**  $^1\text{H}$  NMR spectrum of **17a** in  $\text{CDCl}_3$ .

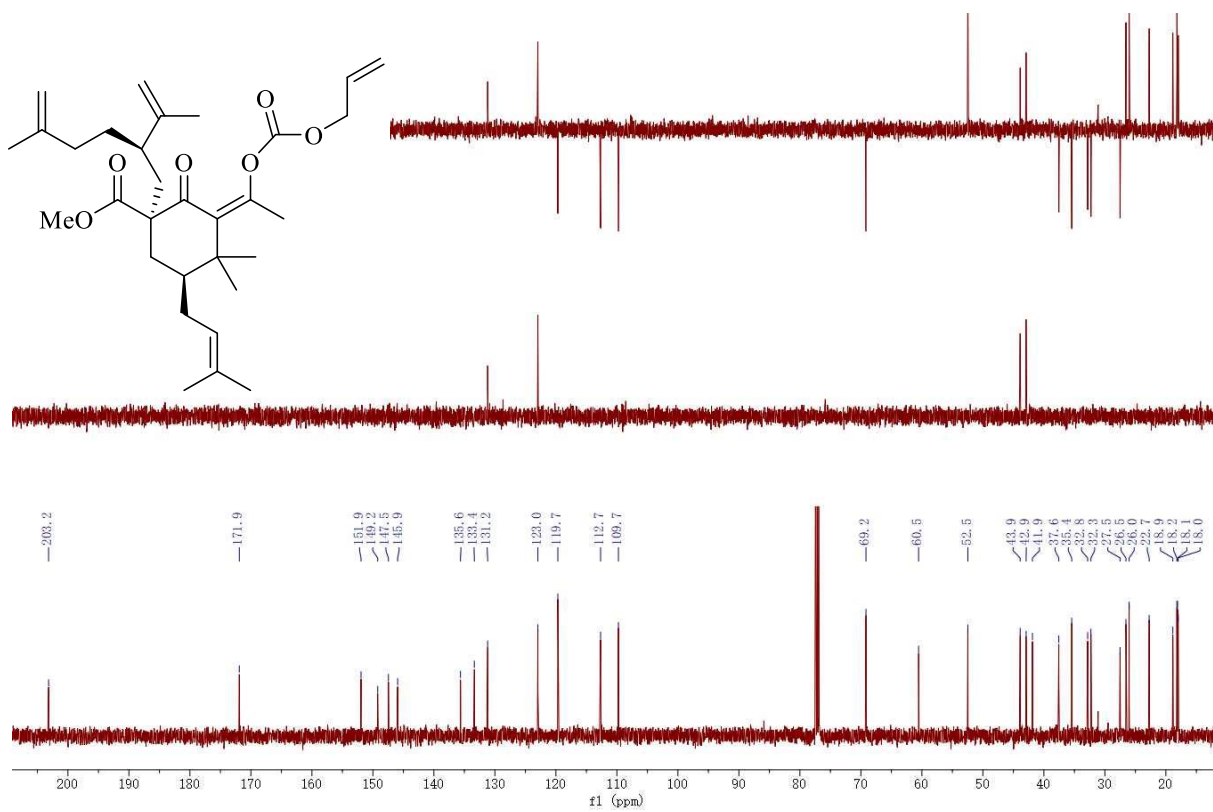

**Figure S32.**  $^{13}\text{C}$  NMR spectrum of **17a** in  $\text{CDCl}_3$ .



## Qualitative Analysis Report

|                        |              |               |                       |
|------------------------|--------------|---------------|-----------------------|
| Data Filename          | wxb-269-2.d  | Sample Name   | wxb-269-2             |
| Sample Type            | Sample       | Position      | P1-A2                 |
| Instrument Name        | Instrument 1 | User Name     |                       |
| Acq Method             | s.m          | Acquired Time | 5/12/2021 10:49:54 AM |
| IRM Calibration Status | Success      | DA Method     | Default.m             |
| Comment                |              |               |                       |

Sample Group Info.  
 Acquisition SW 6200 series TOF/6500 series  
 Version Q-TOF B.05.01 (B5125.2)

### User Spectra

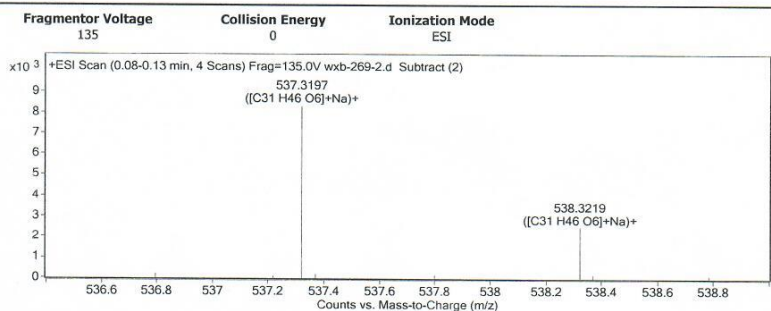

#### Peak List

| m/z      | z | Abund     |
|----------|---|-----------|
| 153.1394 | 1 | 4235841   |
| 154.1423 | 1 | 459318.63 |
| 169.1337 | 1 | 53855.1   |
| 291.2433 | 1 | 27371.02  |
| 321.2653 | 1 | 29003.7   |
| 341.2468 | 1 | 36301.64  |
| 375.2534 | 1 | 27515.32  |
| 397.2353 | 1 | 34005.95  |
| 559.3816 | 1 | 26847.85  |
| 771.4825 |   | 28539.75  |

#### Formula Calculator Element Limits

| Element | Min | Max |
|---------|-----|-----|
| C       | 3   | 60  |
| H       | 0   | 120 |
| O       | 0   | 30  |

#### Formula Calculator Results

| Formula    | CalculatedMass | CalculatedMz | Mz       | Diff. (mDa) | Diff. (ppm) | DBE    |
|------------|----------------|--------------|----------|-------------|-------------|--------|
| C31 H46 O6 | 514.3294       | 537.3187     | 537.3197 | -1.00       | -1.86       | 9.0000 |

--- End Of Report ---

**Figure S33. HRESIMS of 17b.**





## Qualitative Analysis Report

|                        |              |               |                      |
|------------------------|--------------|---------------|----------------------|
| Data Filename          | wxb-271-1.d  | Sample Name   | wxb-271-1            |
| Sample Type            | Sample       | Position      | P1-C1                |
| Instrument Name        | Instrument 1 | User Name     |                      |
| Acq Method             | s.m          | Acquired Time | 5/17/2021 2:04:47 PM |
| IRM Calibration Status | Success      | DA Method     | Default.m            |
| Comment                |              |               |                      |

Sample Group Info.  
 Acquisition SW 6200 series TOF/6500 series  
 Version Q-TOF B.05.01 (B5125.2)

### User Spectra

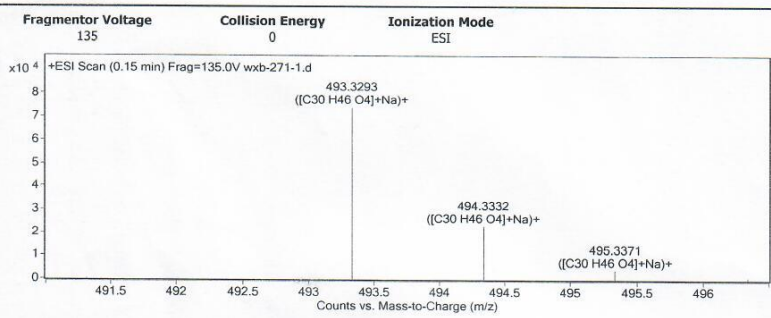

| <i>m/z</i> | z | Abund     | Formula    | Ion     |
|------------|---|-----------|------------|---------|
| 102.1273   | 1 | 460297.94 |            |         |
| 103.1304   | 1 | 35493.7   |            |         |
| 180.1254   | 1 | 17220.6   |            |         |
| 202.1071   | 1 | 15149.2   |            |         |
| 242.2838   | 1 | 18103.5   |            |         |
| 471.3475   | 1 | 22198.11  |            |         |
| 493.3293   | 1 | 73924.98  | C30 H46 O4 | (M+Na)+ |
| 494.3332   | 1 | 22871.47  | C30 H46 O4 | (M+Na)+ |
| 509.3038   | 1 | 39573.56  |            |         |
| 963.672    | 1 | 23217.61  |            |         |

#### Formula Calculator Element Limits

| Element | Min | Max |
|---------|-----|-----|
| C       | 3   | 60  |
| H       | 0   | 120 |
| O       | 0   | 30  |

#### Formula Calculator Results

| Formula    | CalculatedMass | CalculatedMz | Mz       | Diff. (mDa) | Diff. (ppm) | DBE    |
|------------|----------------|--------------|----------|-------------|-------------|--------|
| C30 H46 O4 | 470.3396       | 493.3288     | 493.3293 | -0.50       | -1.01       | 8.0000 |

--- End Of Report ---

**Figure S36. ESIMS of 18a.**

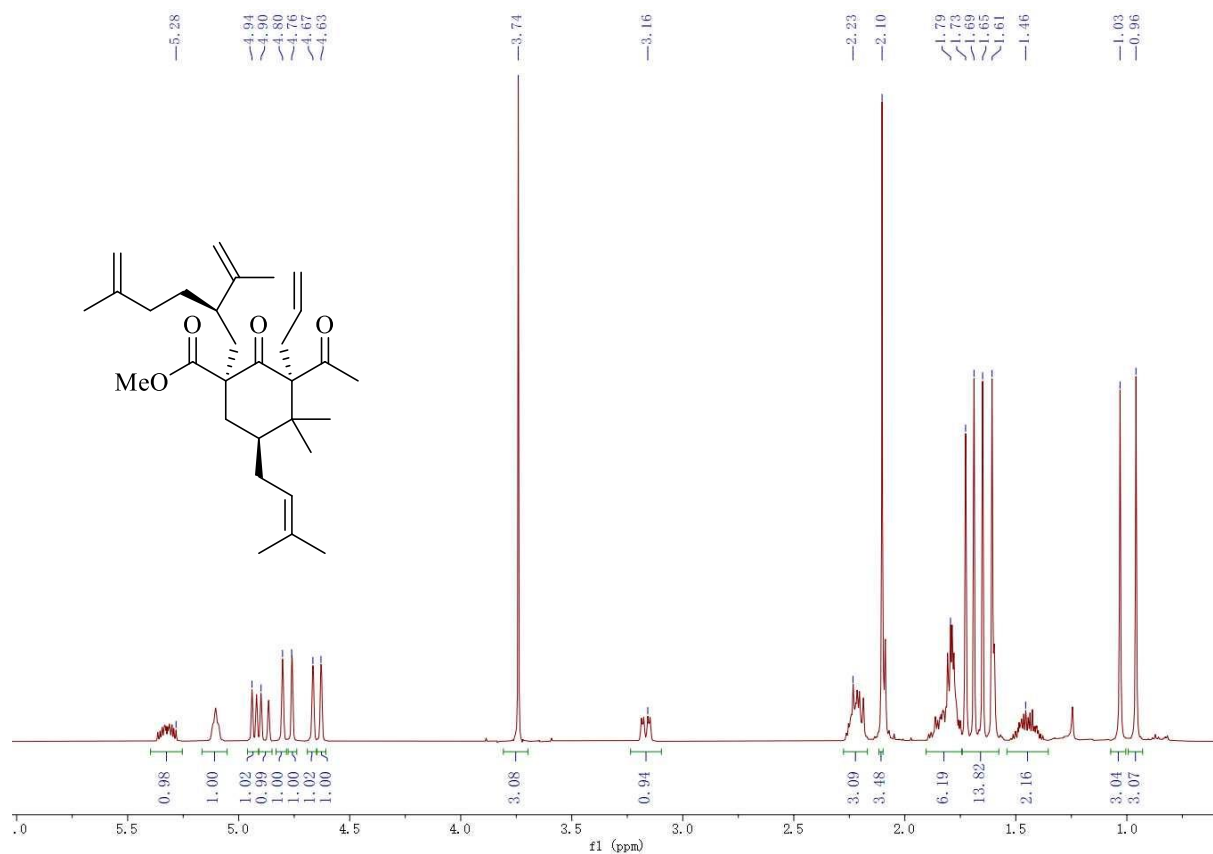

Figure S37.  $^1\text{H}$  NMR spectrum of **18a** in CDCl<sub>3</sub>.

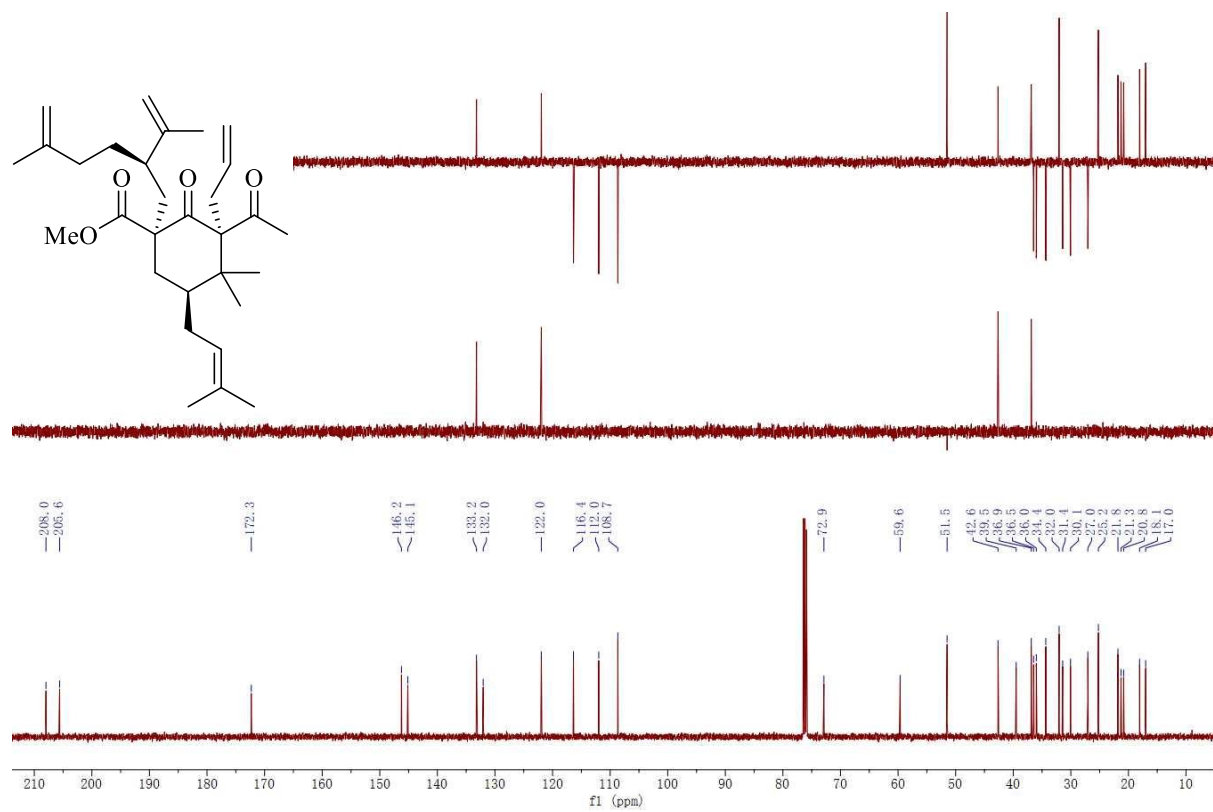

Figure S38.  $^{13}\text{C}$  NMR spectrum of **18a** in CDCl<sub>3</sub>.

## Qualitative Analysis Report

|                        |                             |               |                      |
|------------------------|-----------------------------|---------------|----------------------|
| Data Filename          | wxb-271-2.d                 | Sample Name   | wxb-271-2            |
| Sample Type            | Sample                      | Position      | P1-C1                |
| Instrument Name        | Instrument 1                | User Name     |                      |
| Acq Method             | s.m                         | Acquired Time | 5/21/2021 9:16:39 AM |
| IRM Calibration Status | Success                     | DA Method     | Default.m            |
| Comment                |                             |               |                      |
| Sample Group           |                             | Info.         |                      |
| Acquisition SW         | 6200 series TOF/6500 series |               |                      |
| Version                | Q-TOF B.05.01 (B5125.2)     |               |                      |

### User Spectra

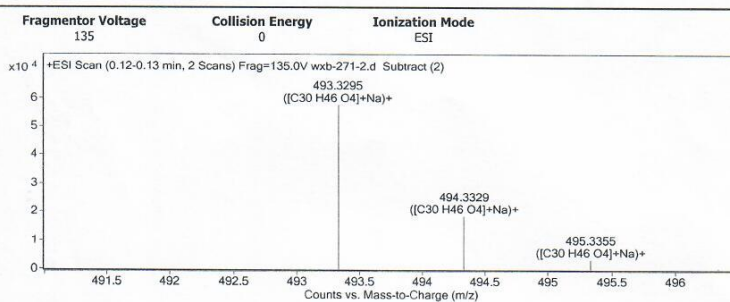

### Peak List

| m/z      | z | Abund    | Formula    | Ion     |
|----------|---|----------|------------|---------|
| 102.1282 |   | 4925.16  |            |         |
| 130.1593 | 1 | 36687.91 |            |         |
| 275.6641 | 2 | 6173.03  |            |         |
| 488.3741 | 1 | 16235.37 |            |         |
| 489.3774 | 1 | 5355.07  |            |         |
| 493.3295 | 1 | 57530.7  | C30 H46 O4 | (M+Na)+ |
| 494.3329 | 1 | 18451.21 | C30 H46 O4 | (M+Na)+ |
| 509.3032 | 1 | 23351.3  |            |         |
| 510.3063 | 1 | 7946.87  |            |         |
| 680.4812 | 1 | 4599.17  |            |         |
| 963.67   | 1 | 7578.02  |            |         |
| 964.6738 | 1 | 4630.06  |            |         |

### Formula Calculator Element Limits

| Element | Min | Max |
|---------|-----|-----|
| C       | 3   | 60  |
| H       | 0   | 120 |
| O       | 0   | 30  |

### Formula Calculator Results

| Formula    | CalculatedMass | CalculatedMz | Mz       | Diff. (mDa) | Diff. (ppm) | DBE    |
|------------|----------------|--------------|----------|-------------|-------------|--------|
| C30 H46 O4 | 470.3396       | 493.3288     | 493.3295 | -0.70       | -1.42       | 8.0000 |

--- End Of Report ---

**Figure S39. ESIMS of 18b.**

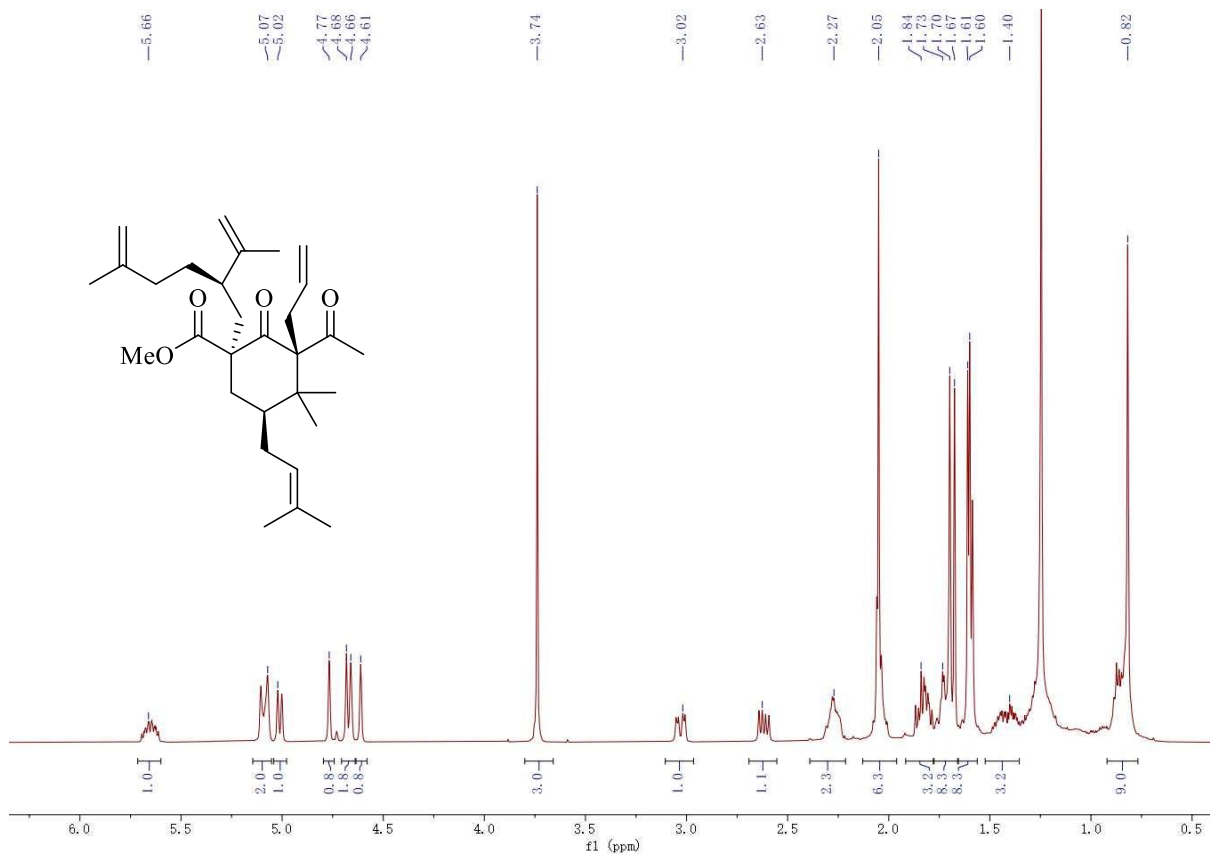

Figure S40.  $^1\text{H}$  NMR spectrum of **18b** in  $\text{CDCl}_3$ .

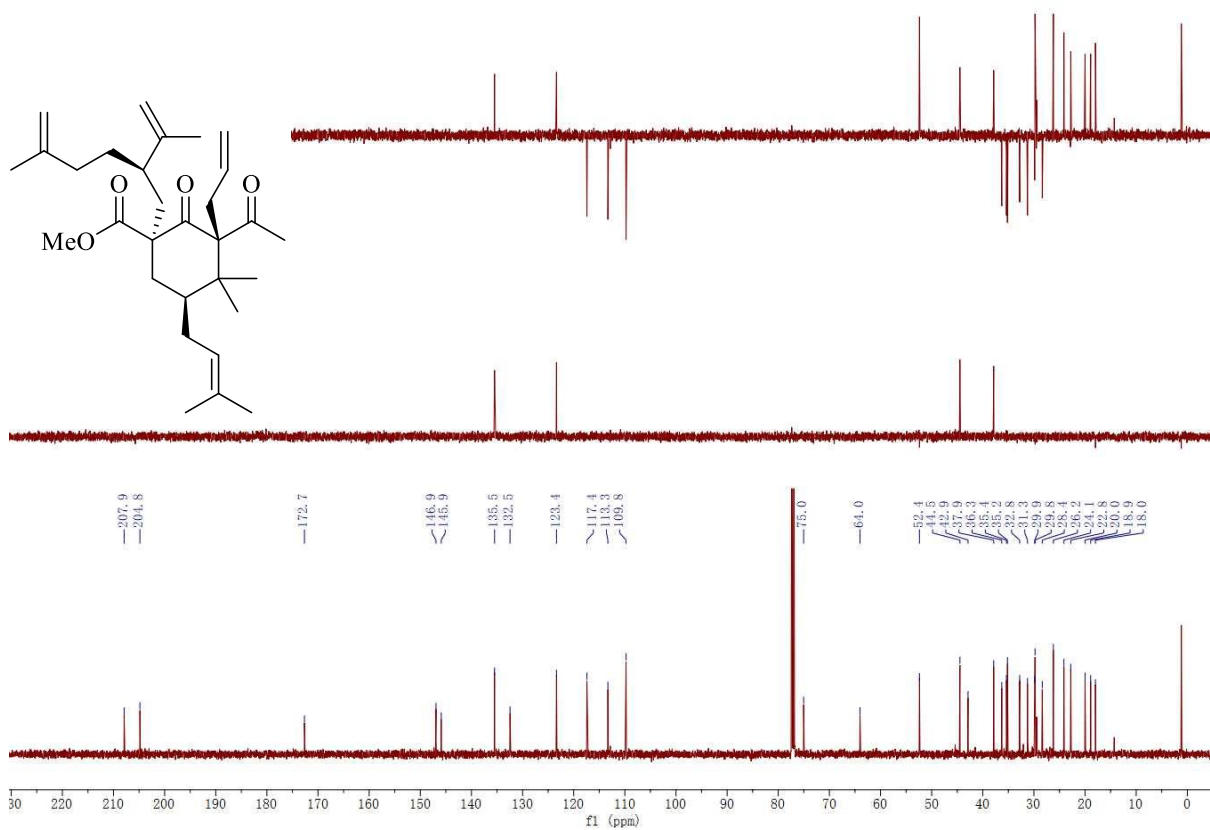

Figure S41.  $^{13}\text{C}$  NMR spectrum of **18b** in  $\text{CDCl}_3$ .

Data File: E:\DATA\2021\0602\wxb-281.lcd

| Elmt | Val. | Min | Max | Use Adduct |
|------|------|-----|-----|------|------|-----|-----|------|------|-----|-----|------|------|-----|-----|------------|
| H    | 1    | 10  | 100 | O    | 2    | 0   | 30  | P    | 3    | 0   | 0   | Se   | 2    | 0   | 0   | H          |
| 2H   | 1    | 0   | 0   | F    | 1    | 0   | 0   | S    | 2    | 0   | 0   | Br   | 1    | 0   | 0   | HCOO       |
| B    | 3    | 0   | 0   | Na   | 1    | 0   | 0   | Cl   | 1    | 0   | 0   | Pd   | 2    | 0   | 0   |            |
| C    | 4    | 5   | 50  | Mg   | 2    | 0   | 0   | Co   | 2    | 0   | 0   | Ag   | 1    | 0   | 0   |            |
| N    | 3    | 0   | 10  | Si   | 4    | 0   | 0   | Cu   | 2    | 0   | 0   | I    | 3    | 0   | 0   |            |

Error Margin (ppm): 5  
 HC Ratio: unlimited  
 Max Isotopes: all  
 MSn Iso RI (%): 75.00

DBE Range: not fixed  
 Apply N Rule: yes  
 Isotope RI (%): 1.00  
 MSn Logic Mode: OR

Electron Ions: both  
 Use MSn Info: yes  
 Isotope Res: 10000  
 Max Results: 20

Event#: 2 MS(E-) Ret. Time : 0.480 Scan#: 74

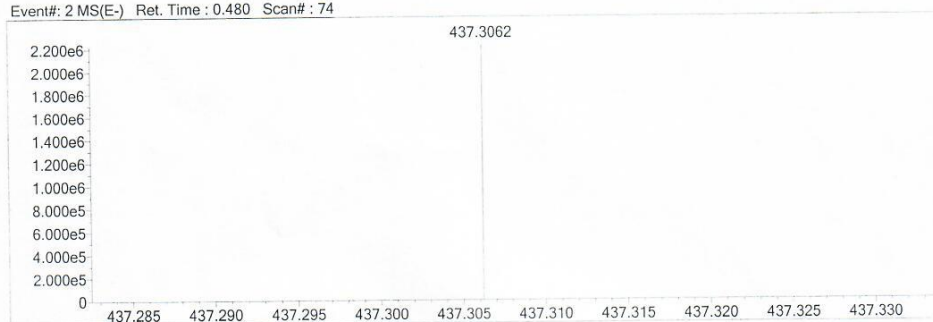

Measured region for 437.3062 m/z

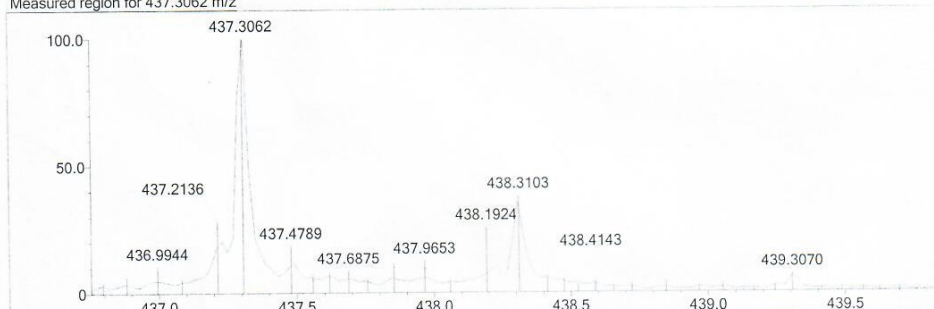

C29 H42 O3 [M-H]- : Predicted region for 437.3061 m/z

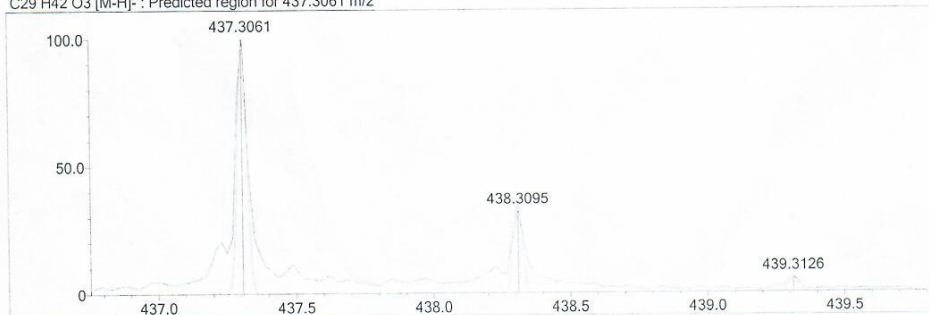

| Formula (M) | Ion    | Meas. m/z | Pred. m/z | Df. (mDa) | Df. (ppm) | DBE |
|-------------|--------|-----------|-----------|-----------|-----------|-----|
| C29 H42 O3  | [M-H]- | 437.3062  | 437.3061  | 0.1       | 0.23      | 9.0 |

Figure S42. HRESIMS of 19.



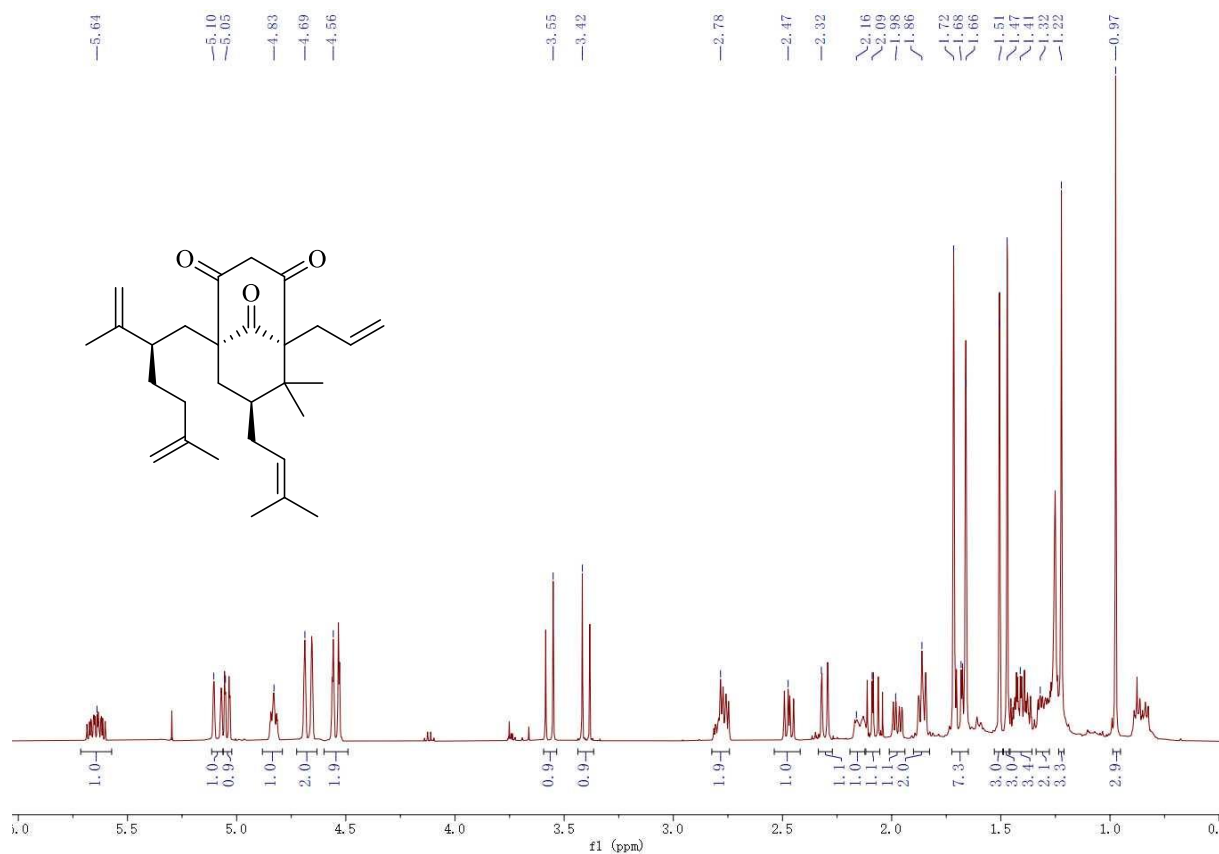

**Figure S43.** <sup>1</sup>H NMR spectrum of **19** in CDCl<sub>3</sub>.

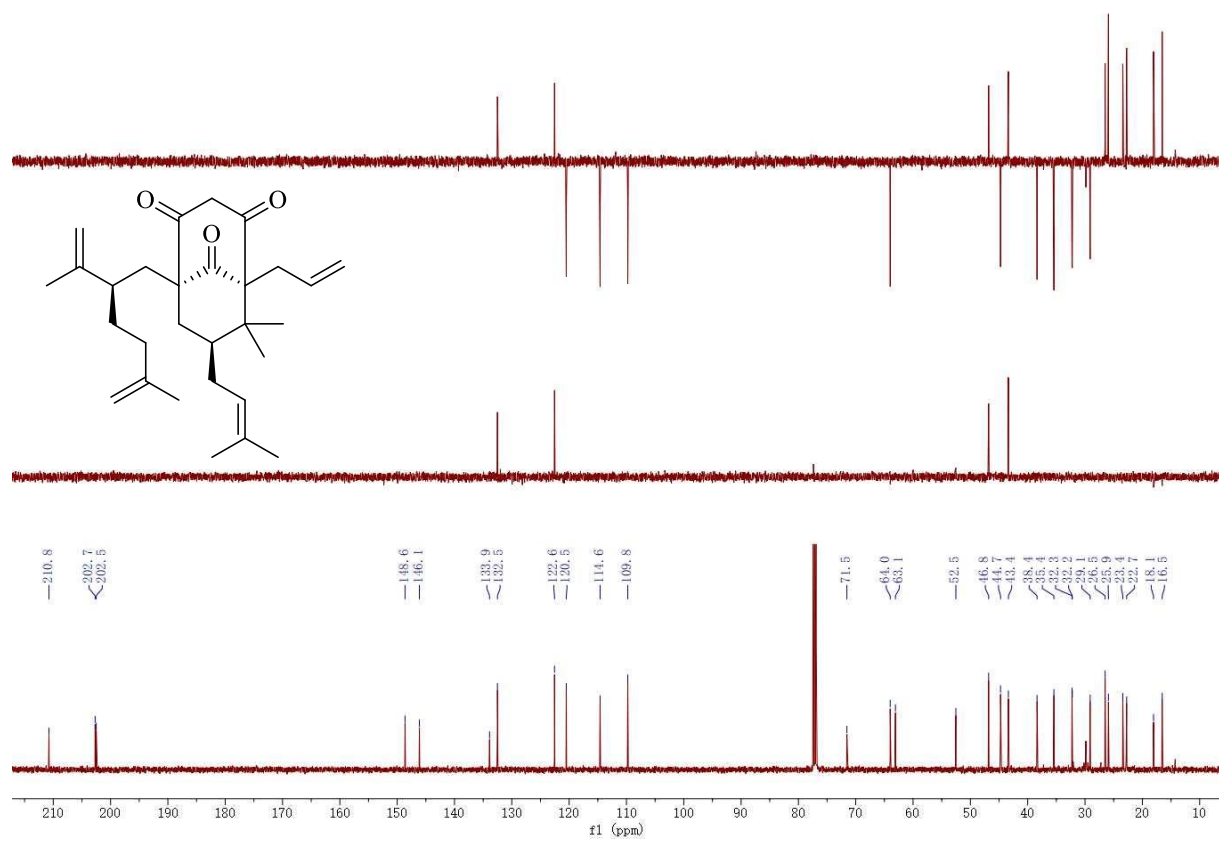

**Figure S44.** <sup>13</sup>C NMR spectrum of **19** in CDCl<sub>3</sub>.

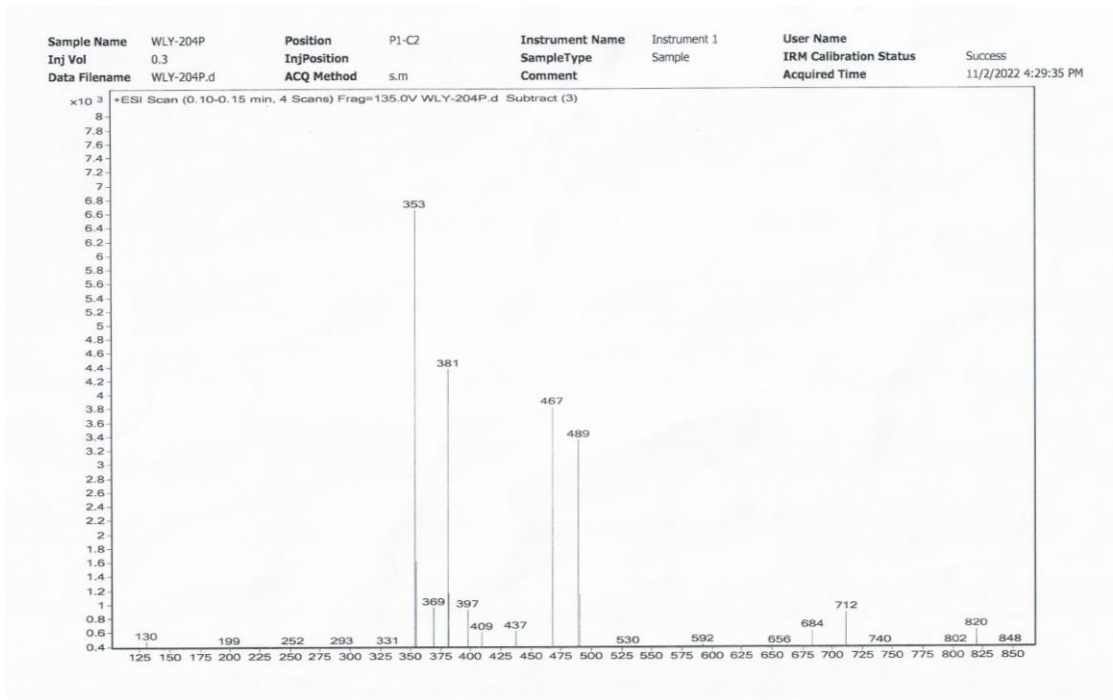

**Figure S45. ESIMS of 20.**



## Qualitative Analysis Report

|                        |              |               |                      |
|------------------------|--------------|---------------|----------------------|
| Data Filename          | WLY-204P.d   | Sample Name   | WLY-204P             |
| Sample Type            | Sample       | Position      | P1-C2                |
| Instrument Name        | Instrument 1 | User Name     |                      |
| Acq Method             | s.m          | Acquired Time | 11/2/2022 4:29:35 PM |
| IRM Calibration Status | Success      | DA Method     | PCDL.m               |

Sample Group Info.  
 Acquisition SW 6200 series TOF/6500 series  
 Version Q-TOF B.05.01 (B5125.2)

### User Spectra

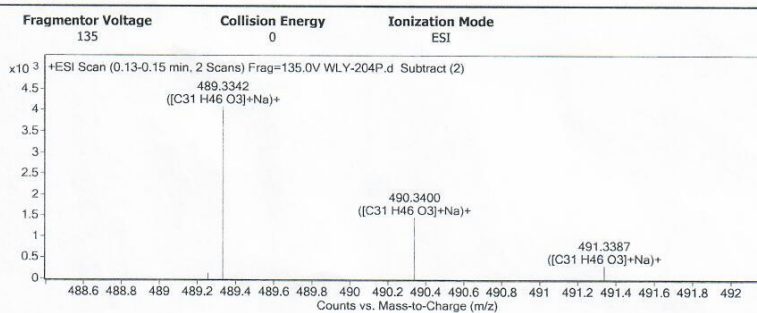

#### Peak List

| m/z       | z | Abund    | Formula    | Ion     |
|-----------|---|----------|------------|---------|
| 353.2672  | 1 | 8412.51  |            |         |
| 354.2699  | 1 | 2029.73  |            |         |
| 381.2984  | 1 | 5447.96  |            |         |
| 467.3522  | 1 | 5047.95  |            |         |
| 489.3342  | 1 | 4072.97  | C31 H46 O3 | (M+Na)+ |
| 1012.5393 | 1 | 1965.36  |            |         |
| 1065.6858 | 1 | 2150.98  |            |         |
| 1173.6836 | 1 | 13457.11 |            |         |
| 1174.687  | 1 | 7883.38  |            |         |
| 1175.69   | 1 | 4353.58  |            |         |

#### Formula Calculator Element Limits

| Element | Min | Max |
|---------|-----|-----|
| C       | 3   | 60  |
| H       | 0   | 120 |
| O       | 0   | 30  |

#### Formula Calculator Results

| Formula    | CalculatedMass | CalculatedMz | Mz       | Diff. (mDa) | Diff. (ppm) | DBE    |
|------------|----------------|--------------|----------|-------------|-------------|--------|
| C31 H46 O3 | 466.3447       | 489.3339     | 489.3342 | -0.30       | -0.61       | 9.0000 |

--- End Of Report ---

**Figure S46. HRESIMS of 20.**

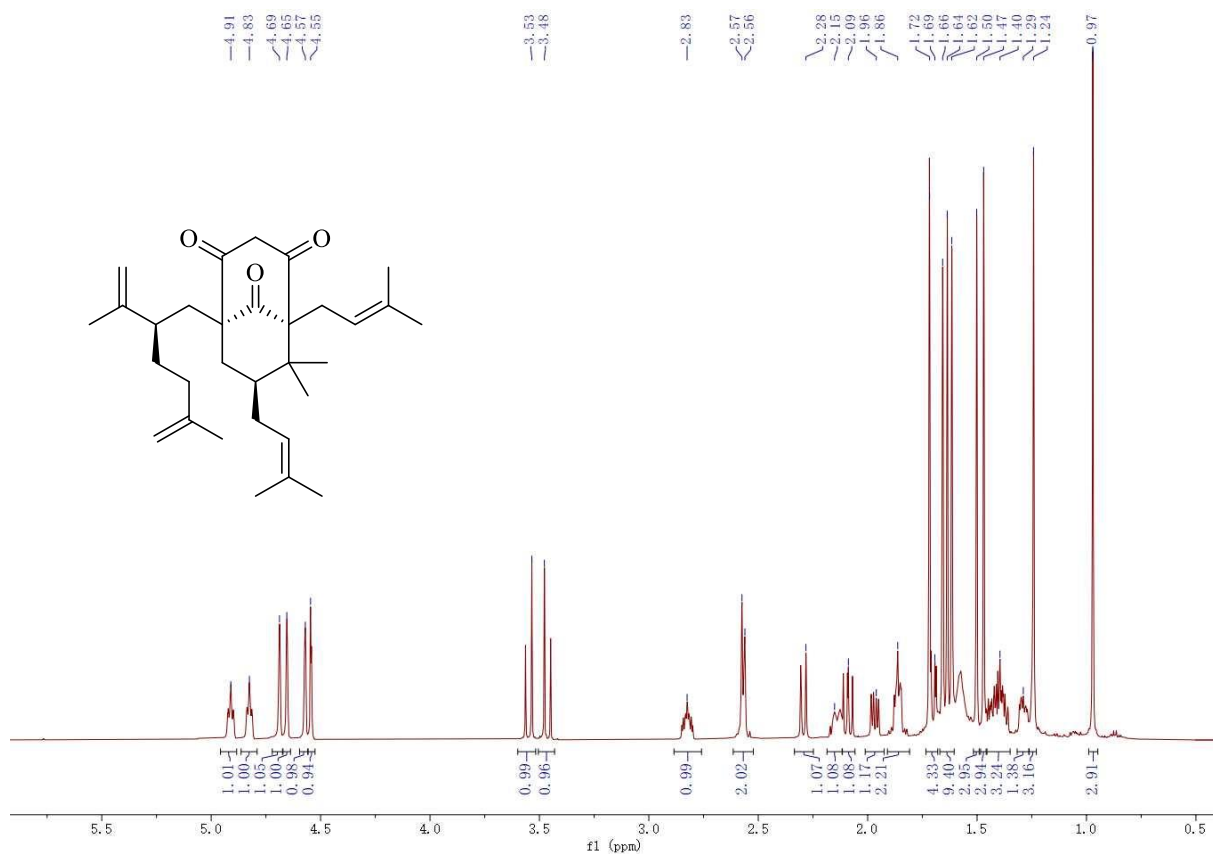

Figure S47. <sup>1</sup>H NMR spectrum of **20** in CDCl<sub>3</sub>.

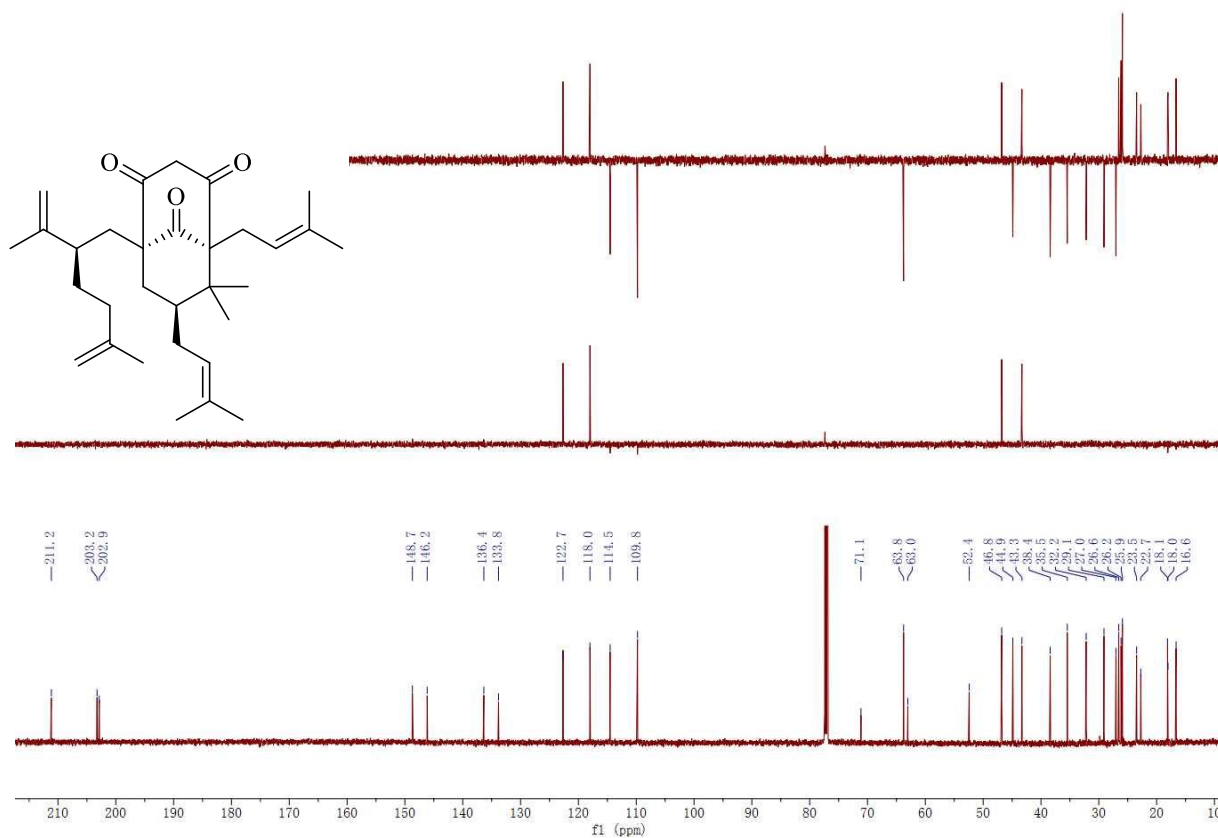

Figure S48. <sup>13</sup>C NMR spectrum of **20** in CDCl<sub>3</sub>.

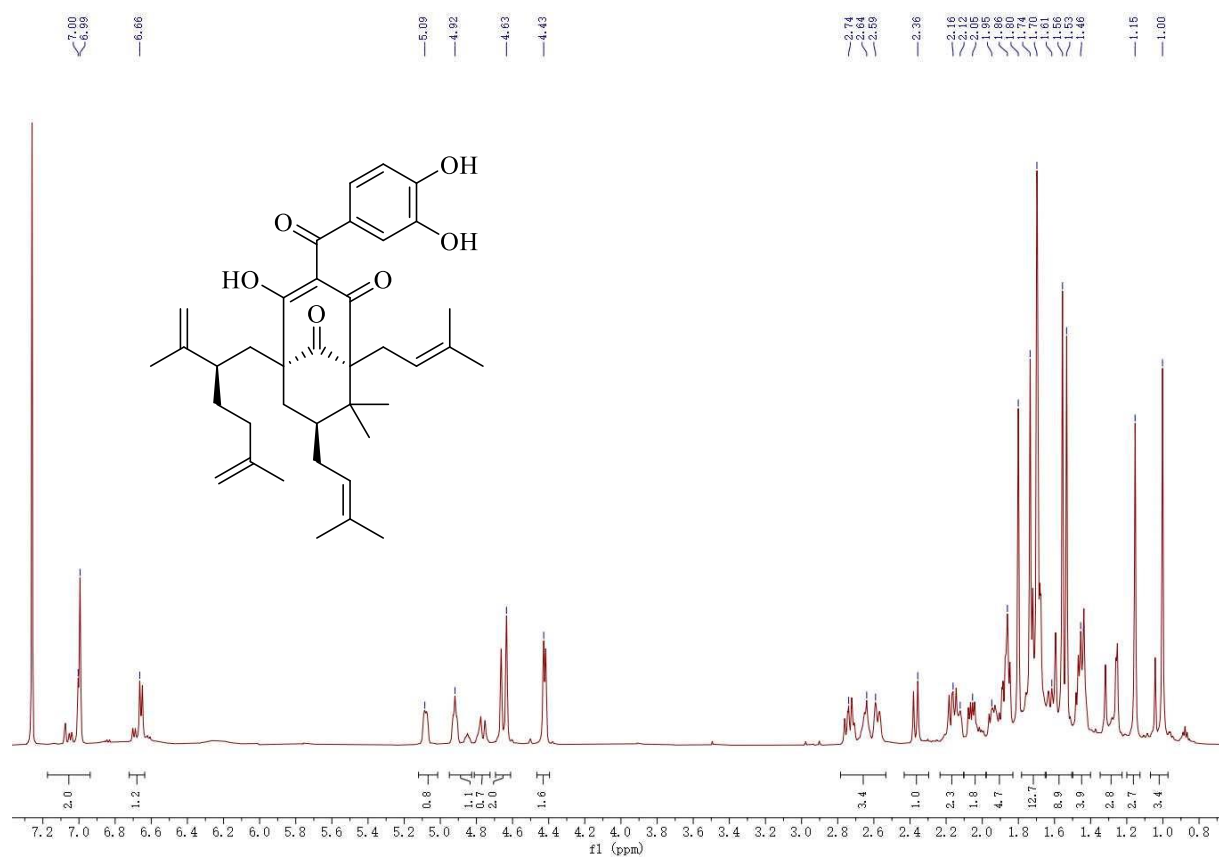

Figure S49.  $^1\text{H}$  NMR spectrum of (±)-xanthochymol in  $\text{CDCl}_3$ .

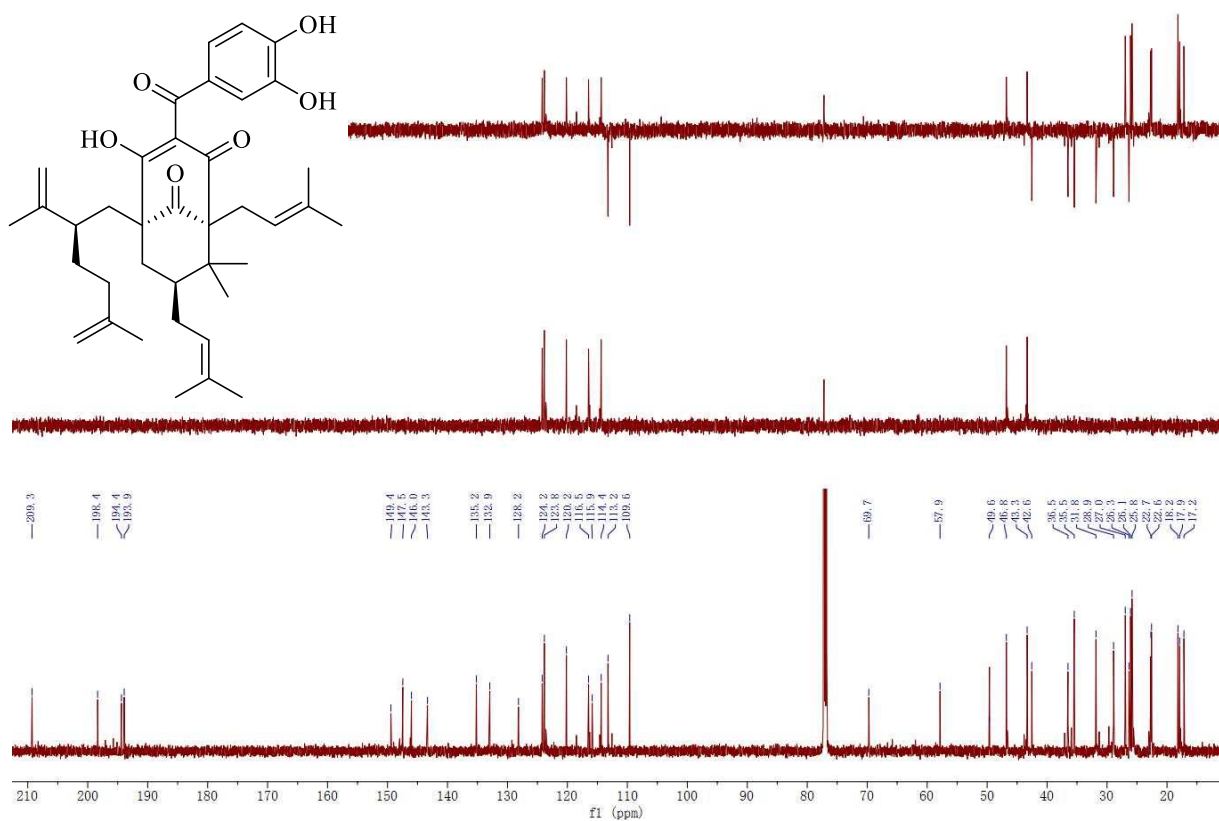

Figure S50.  $^{13}\text{C}$  NMR spectrum of (±)-xanthochymol in  $\text{CDCl}_3$ .

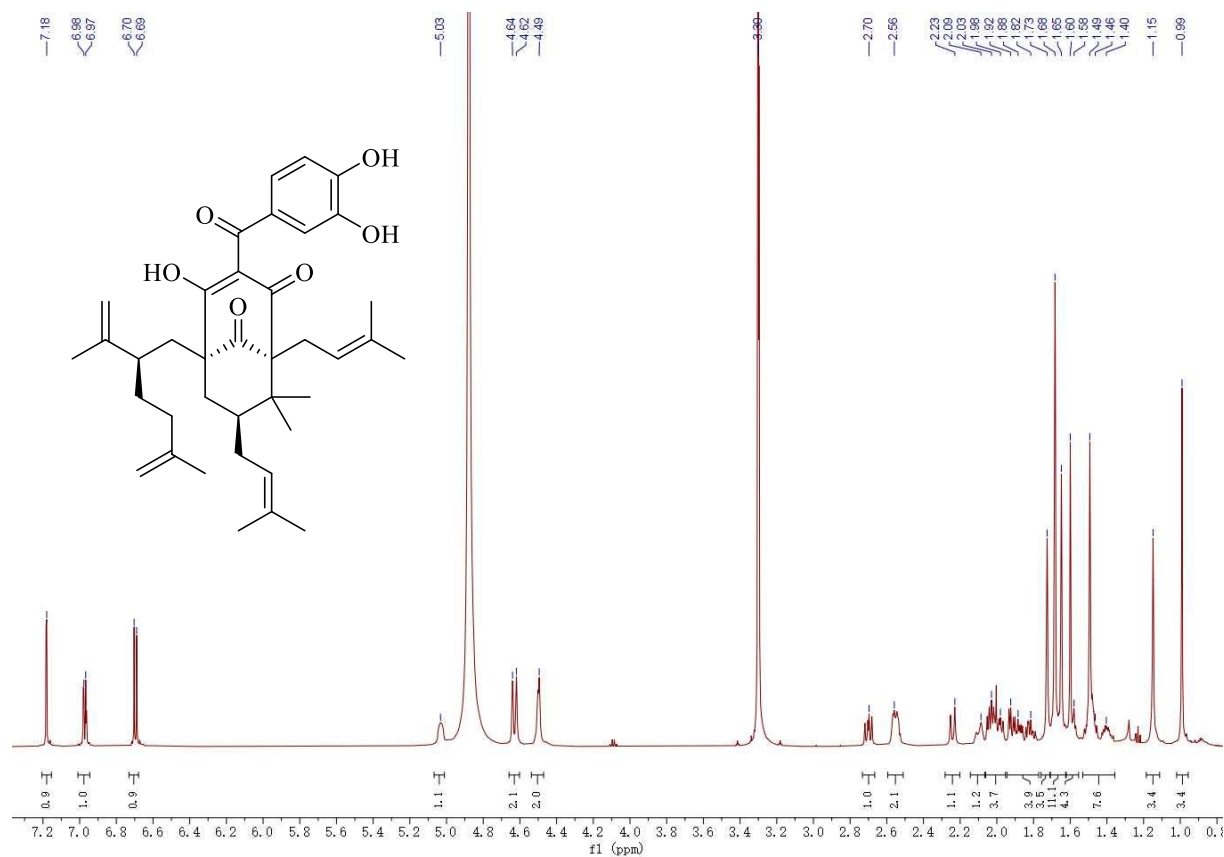

Figure S51. <sup>1</sup>H NMR spectrum of (±)-xanthochymol in CD<sub>3</sub>OD.

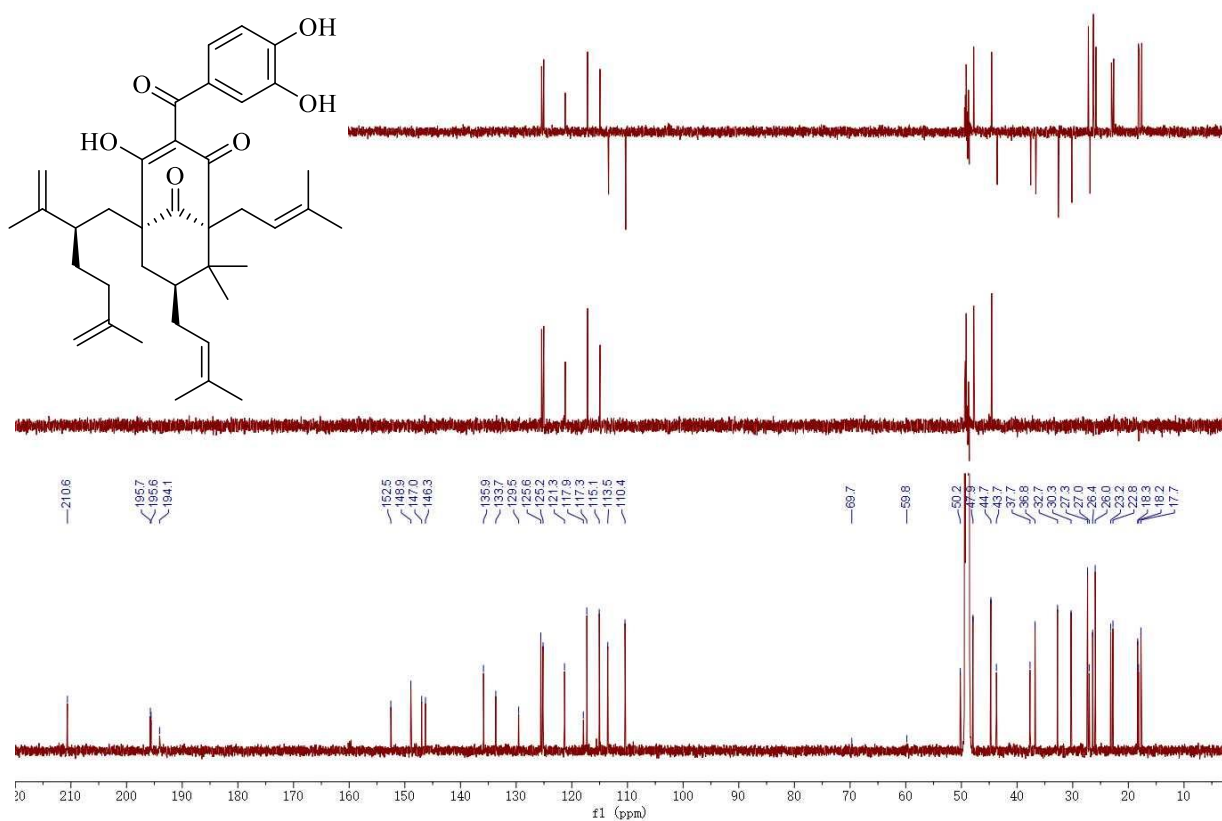

Figure S52. <sup>13</sup>C NMR spectrum of (±)-xanthochymol in CD<sub>3</sub>OD.

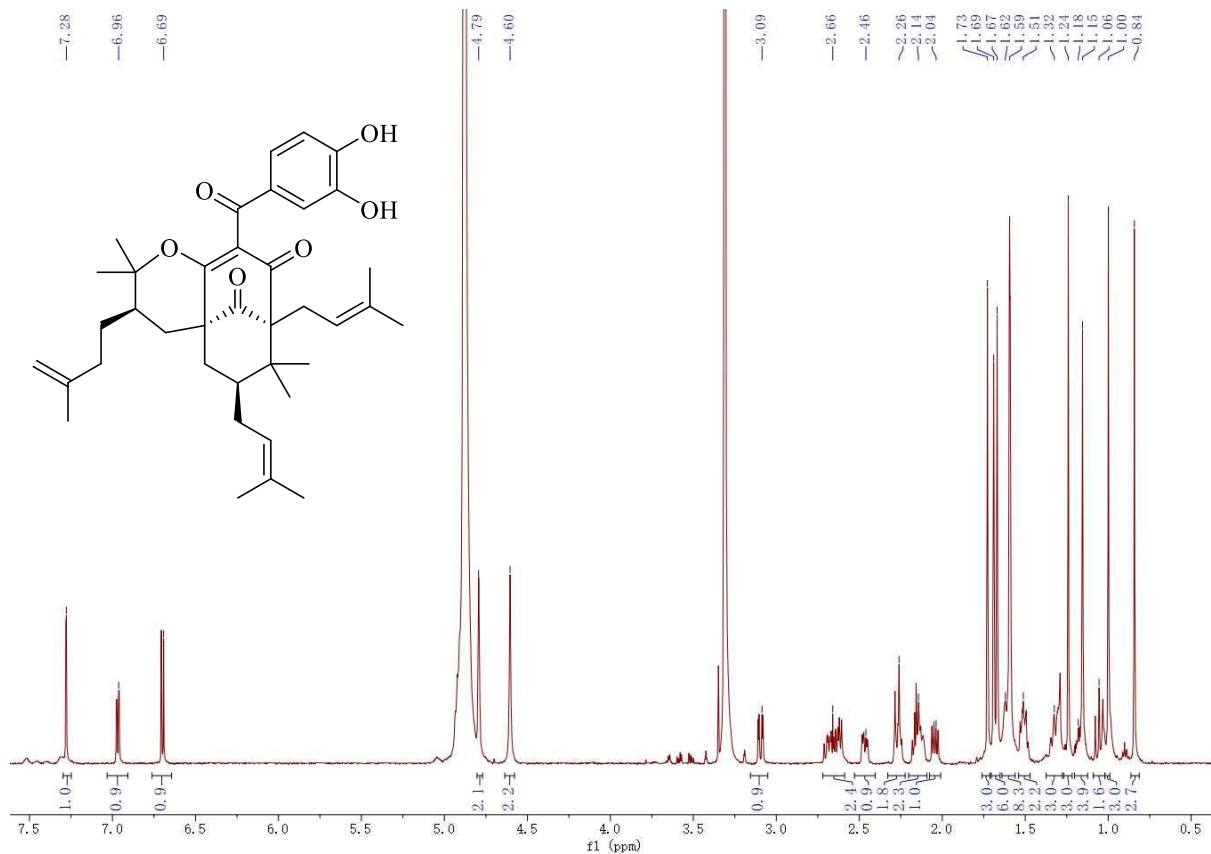

Figure S53. <sup>1</sup>H NMR spectrum of (±)-cycloxanthochymol in CD<sub>3</sub>OD.

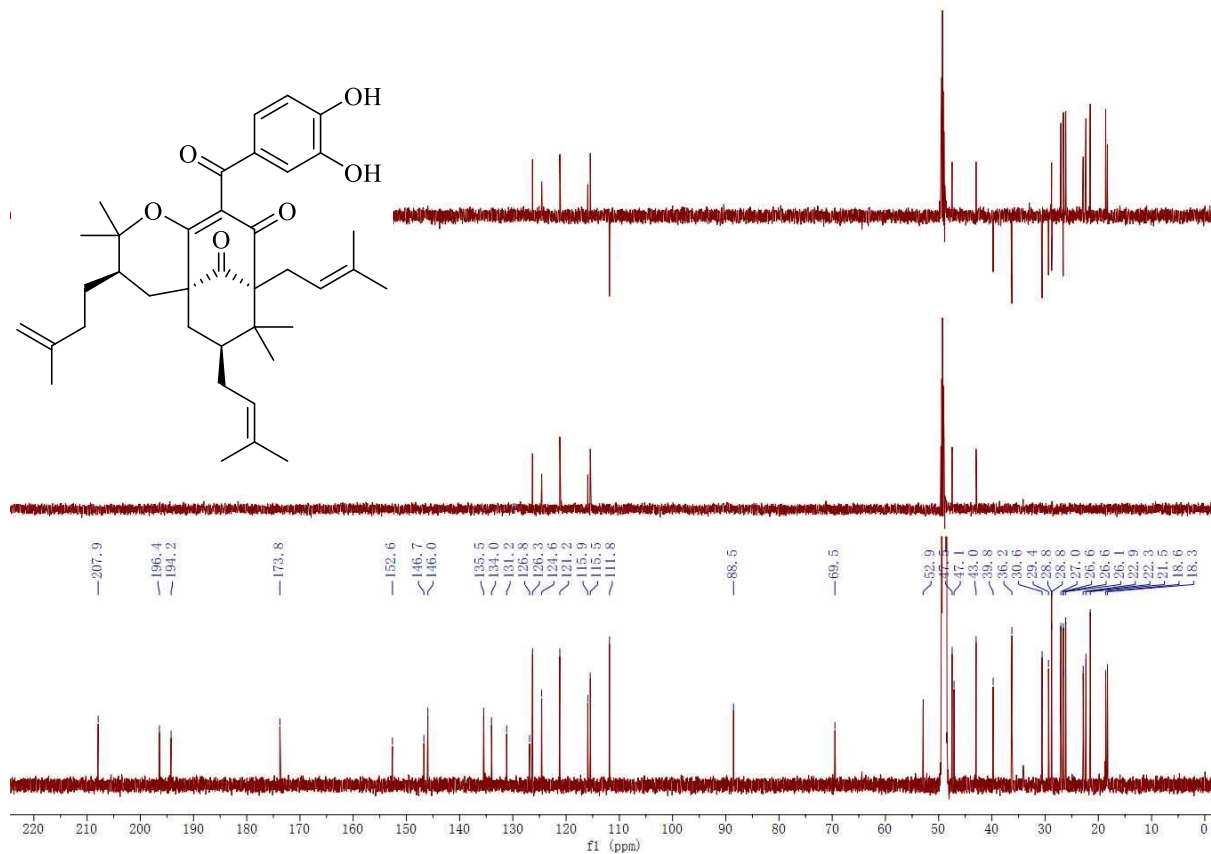

Figure S54. <sup>13</sup>C NMR spectrum of (±)-cycloxanthochymol in CD<sub>3</sub>OD.
